# Supplementary material for: Modelling subglacial fluvial sediment transport with a graph-based model, GraphSSeT
Source: Copernicus journal article supplement (doi:10.5194/egusphere-2024-274), 2024-03-06
Supplement: Supplementary file 1 [file egusphere-2024-274-supplement.pdf]

# 1 Figures for the input hydrology models

## 1.1 A-Series models

### 1.1.1 A4

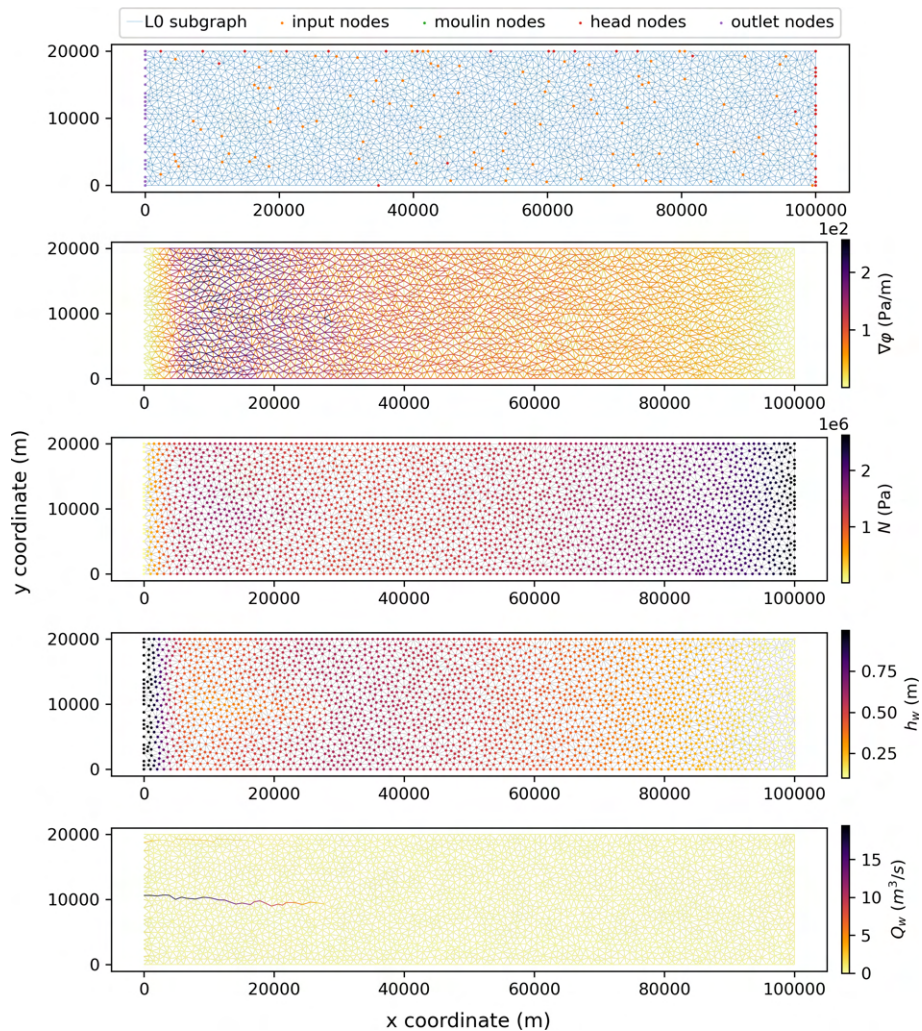

**Figure S1.** Graph representation of the model scenario A4 showing a) network geometry, b) the hydraulic potential gradient (Pa/m) on edges c) effective pressure (Pa) on nodes d) thickness of distributed water flow 'sheet' (m) on nodes and e) the channelised water flux on edges ( $m^3/s$ )

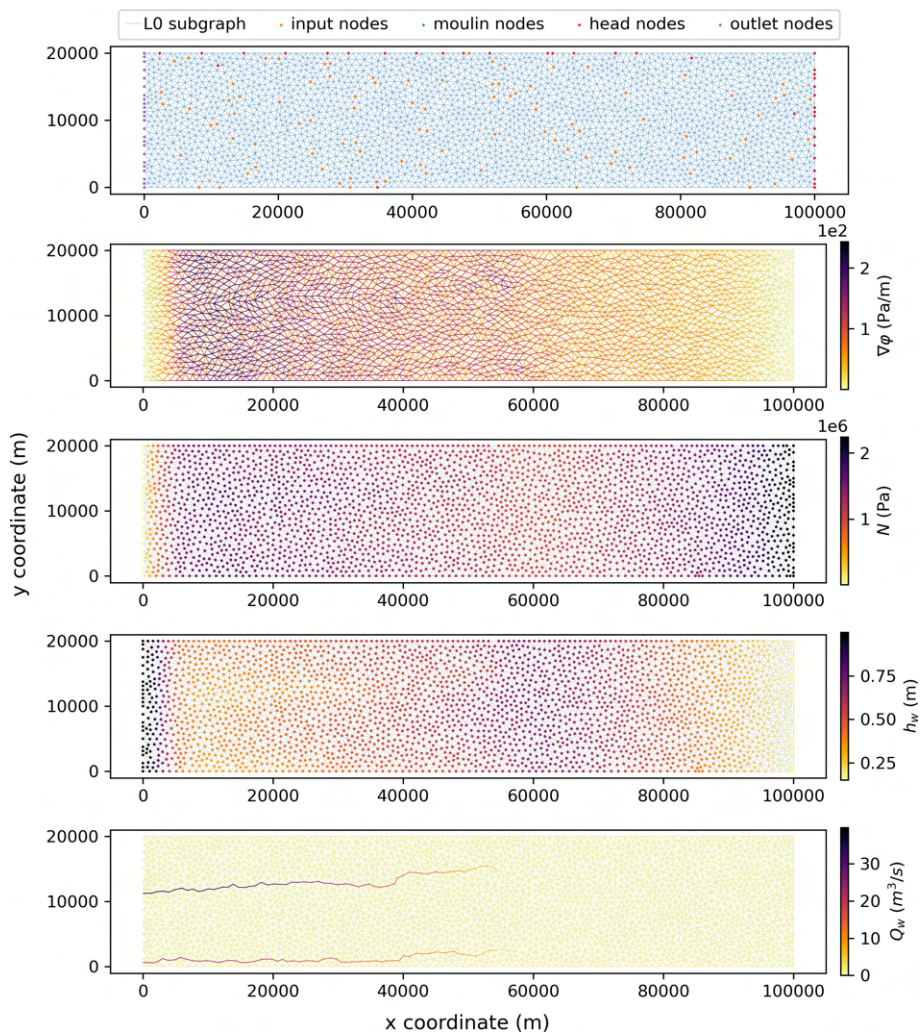

**Figure S2.** Graph representation of the model scenario A5 showing a) network geometry, b) the hydraulic potential gradient (Pa/m) on edges c) effective pressure (Pa) on nodes d) thickness of distributed water flow 'sheet' (m) on nodes and e) the channelised water flux on edges ( $\text{m}^3/\text{s}$ )

### 1.1.3 A7

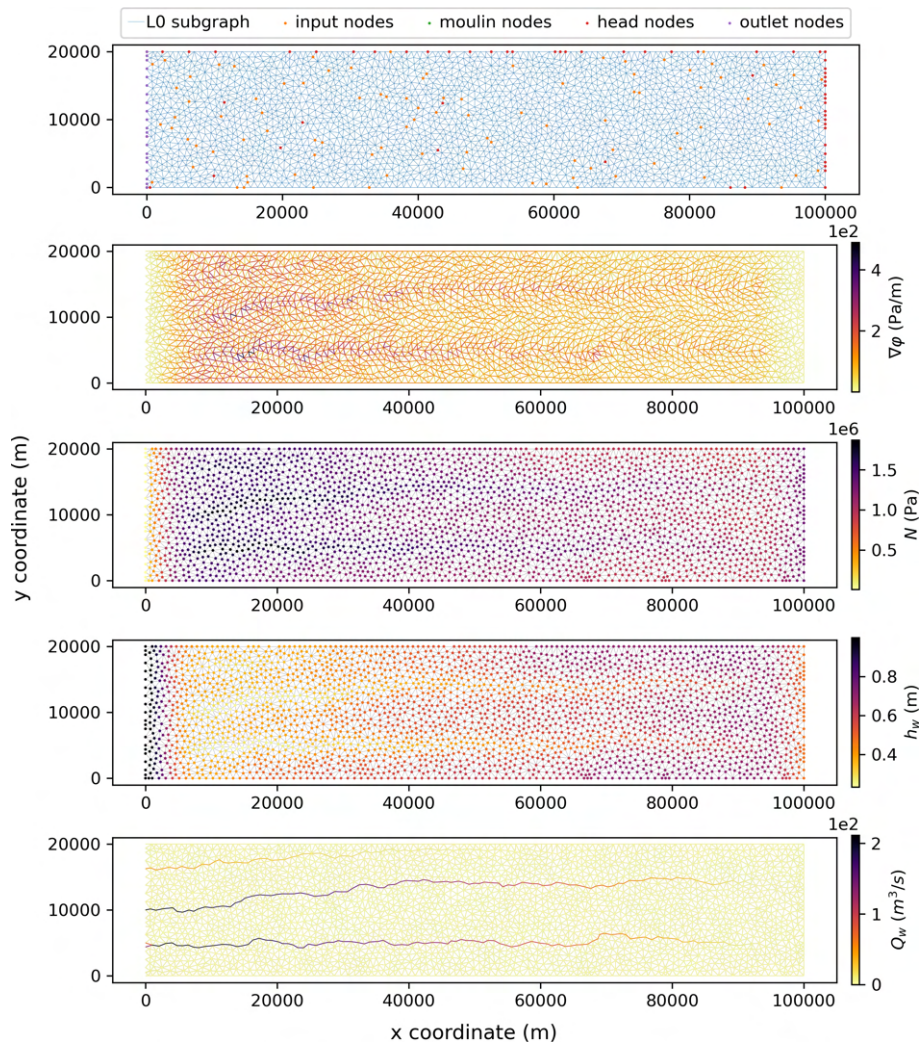

**Figure S3.** Graph representation of the model scenario A7 showing a) network geometry, b) the hydraulic potential gradient (Pa/m) on edges c) effective pressure (Pa) on nodes d) thickness of distributed water flow 'sheet' (m) on nodes and e) the channelised water flux on edges ( $\text{m}^3/\text{s}$ )

### 1.1.4 A8

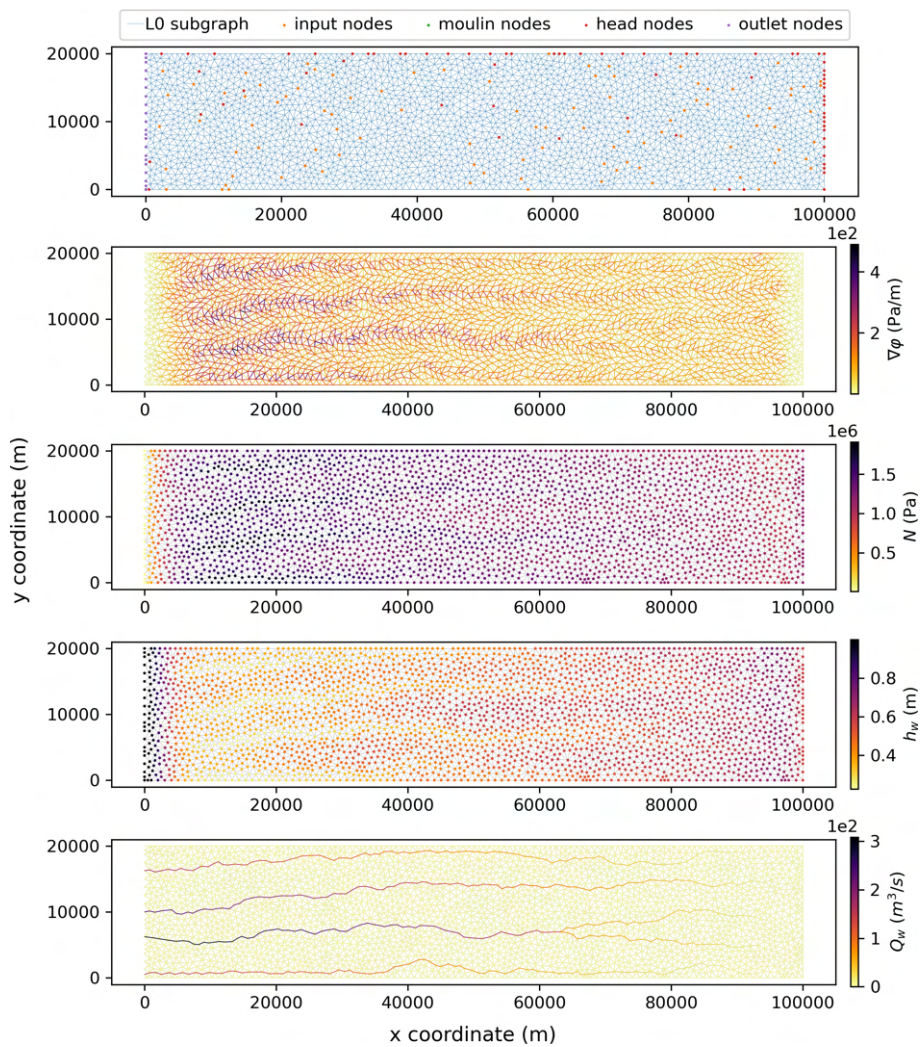

10

**Figure S4.** Graph representation of the model scenario A8 showing a) network geometry, b) the hydraulic potential gradient (Pa/m) on edges c) effective pressure (Pa) on nodes d) thickness of distributed water flow 'sheet' (m) on nodes and e) the channelised water flux on edges ( $\text{m}^3/\text{s}$ )

### 1.1.5 A6

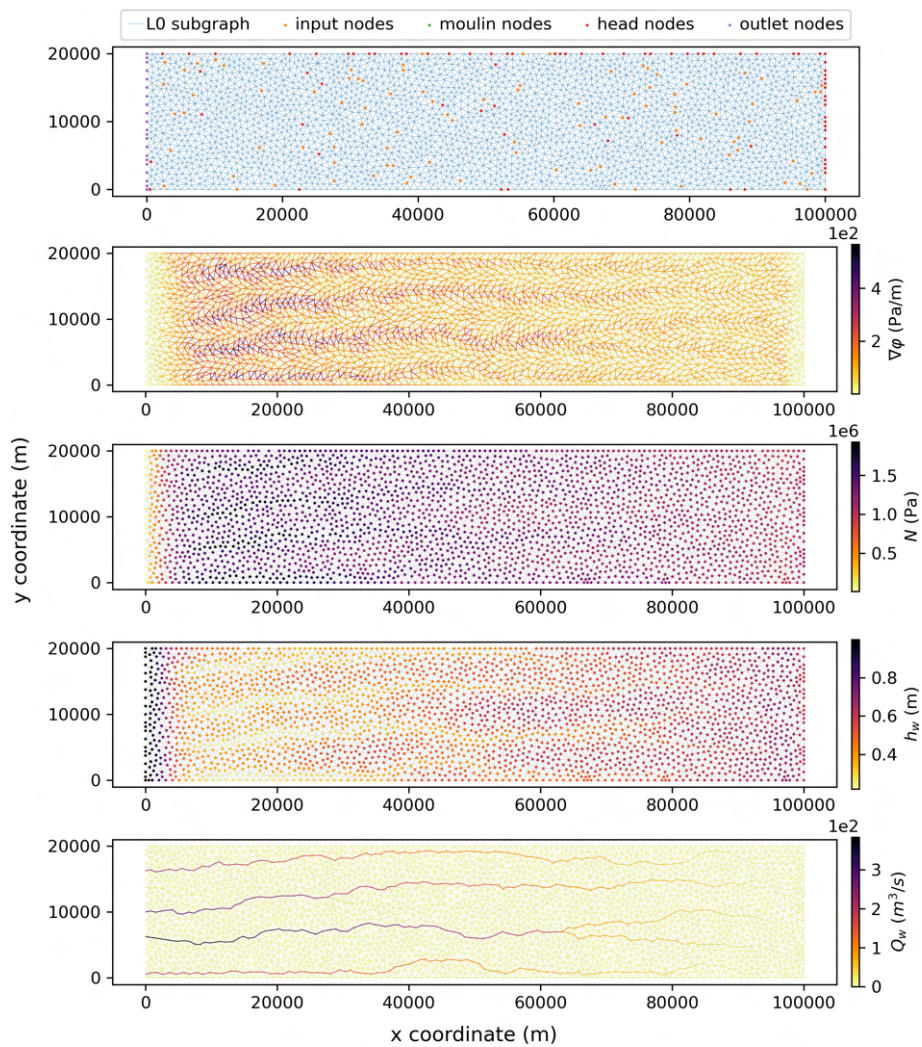

**Figure S5.** Graph representation of the model scenario A6 showing a) network geometry, b) the hydraulic potential gradient (Pa/m) on edges c) effective pressure (Pa) on nodes d) thickness of distributed water flow 'sheet' (m) on nodes and e) the channelised water flux on edges ( $\text{m}^3/\text{s}$ )

### 1.1.6 Edge-betweenness Centrality

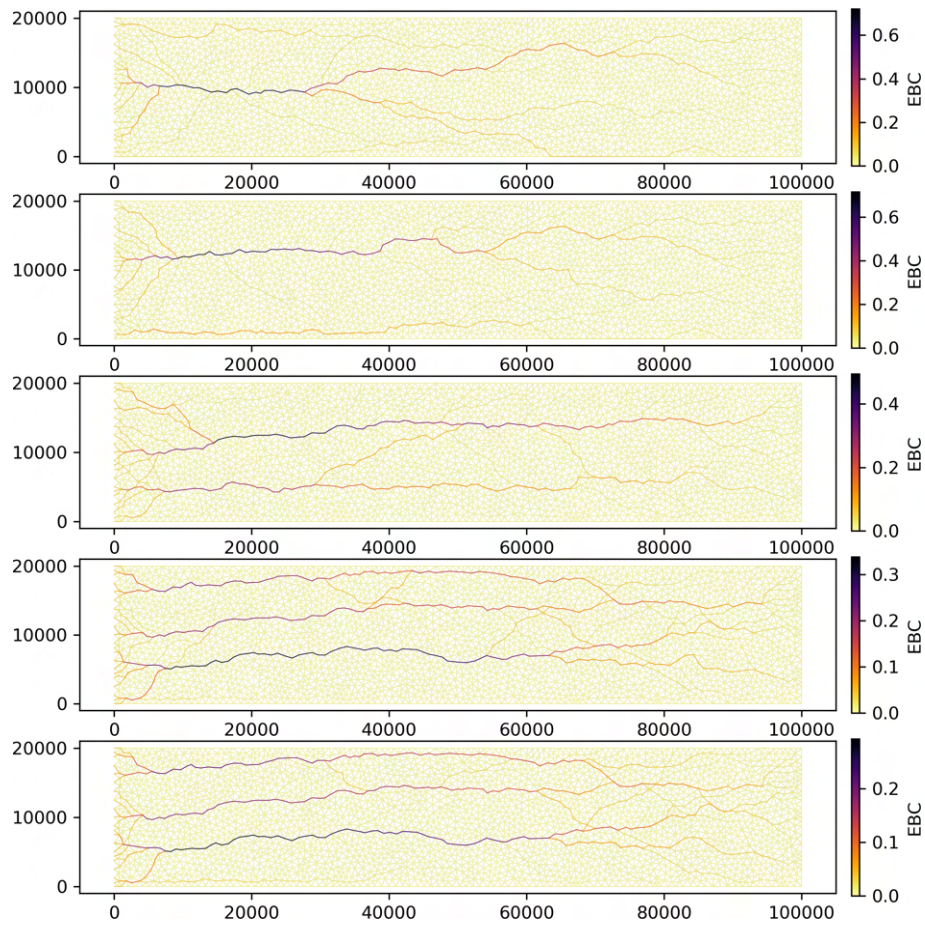

15

**Figure S6.** Edge-betweenness centrality (EBC) with increasing flux a) A4 b) A5 c) A7 d) A8 and e) A6

### 1.1.7 L1 and L2 networks

20

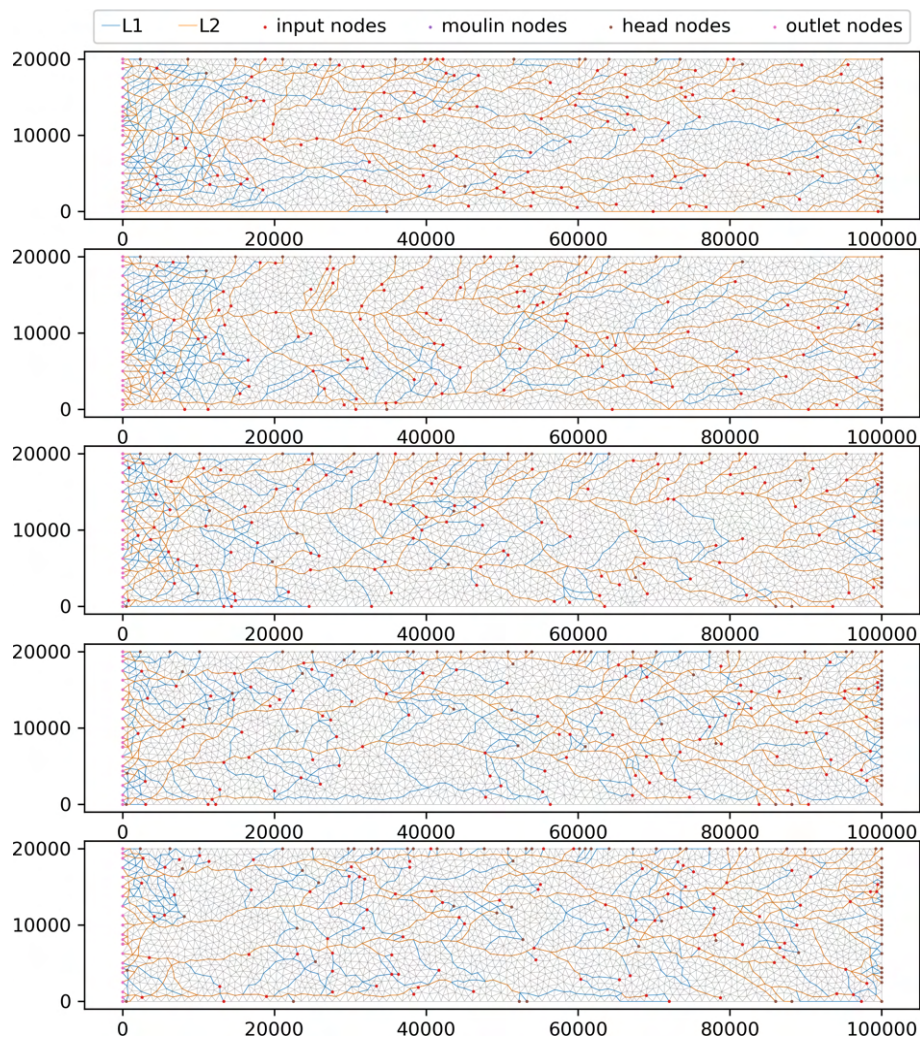

**Figure S7.** L1 and L2 networks for increasing flux a) A4 b) A5 c) A7 d) A8 and e) A6

## 1.2.1 B1

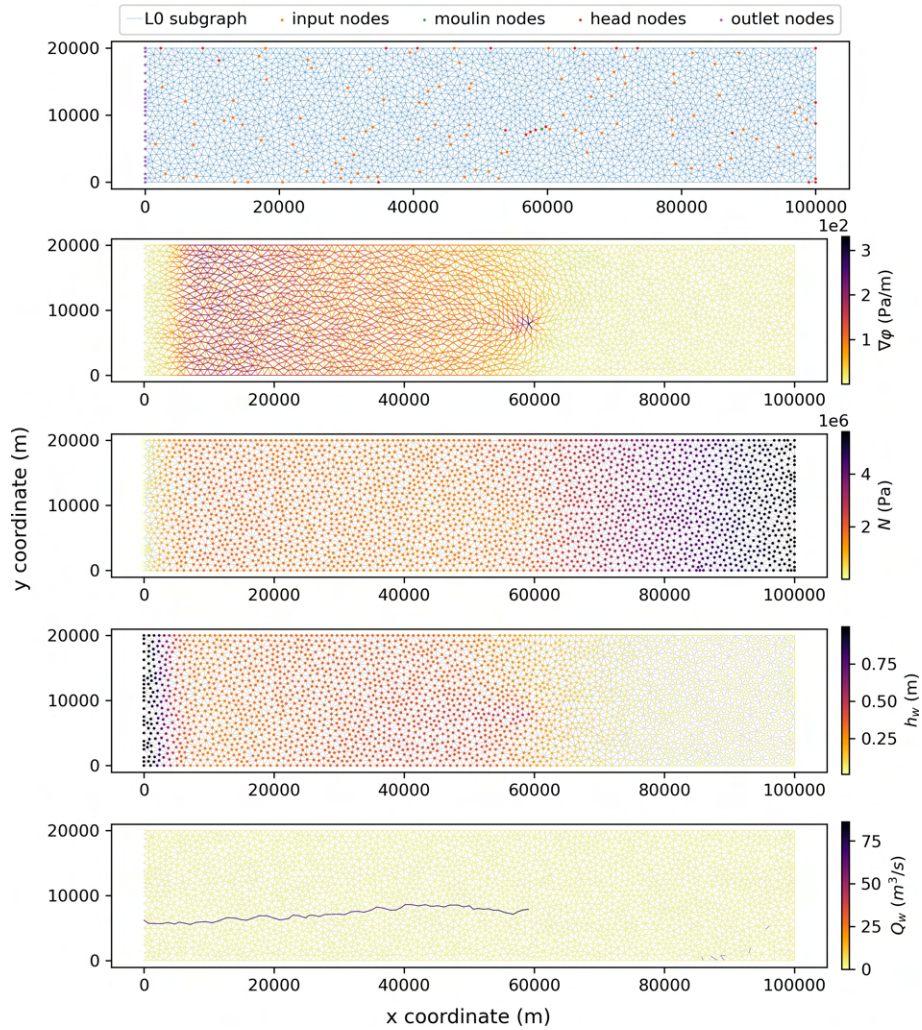

**Figure S8.** Graph representation of the model scenario B1 showing a) network geometry, b) the hydraulic potential gradient (Pa/m) on edges c) effective pressure (Pa) on nodes d) thickness of distributed water flow 'sheet' (m) on nodes and e) the channelised water flux on edges ( $\text{m}^3/\text{s}$ )



## 1.2.2 B2

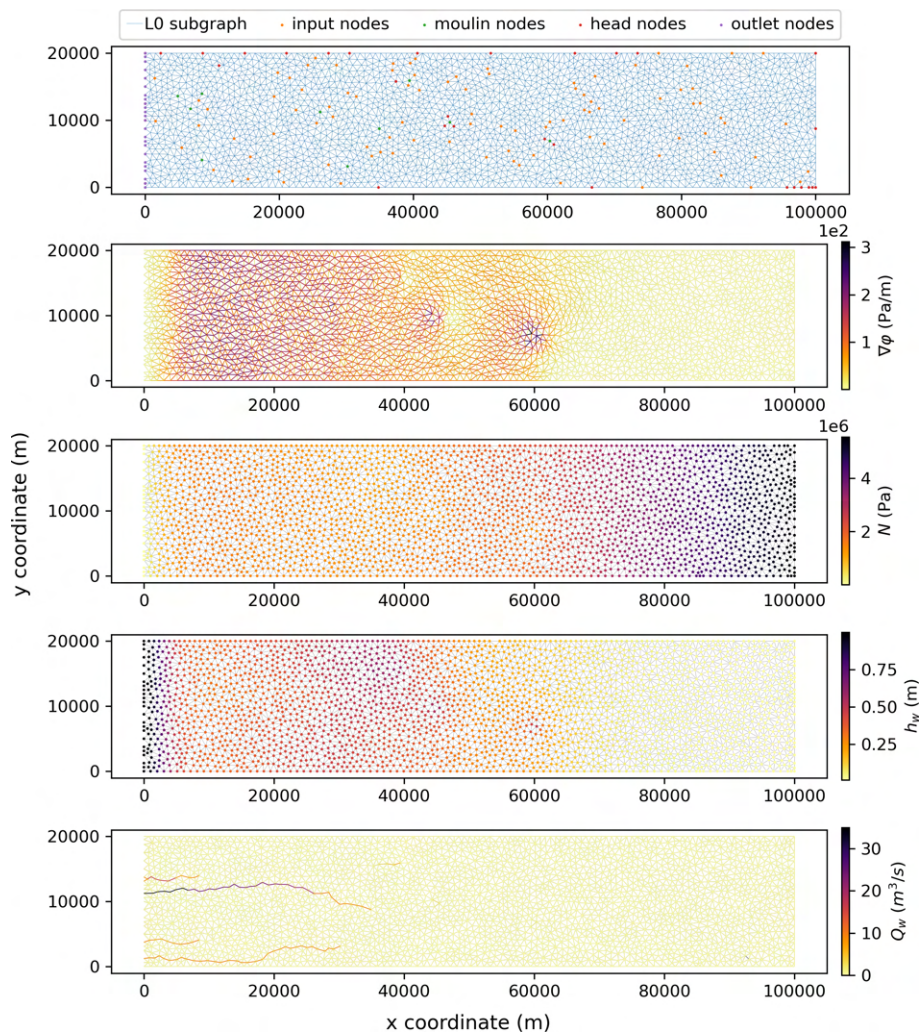

**Figure S9.** Graph representation of the model scenario B2 showing a) network geometry, b) the hydraulic potential gradient (Pa/m) on edges c) effective pressure (Pa) on nodes d) thickness of distributed water flow 'sheet' (m) on nodes and e) the channelised water flux on edges ( $m^3/s$ )

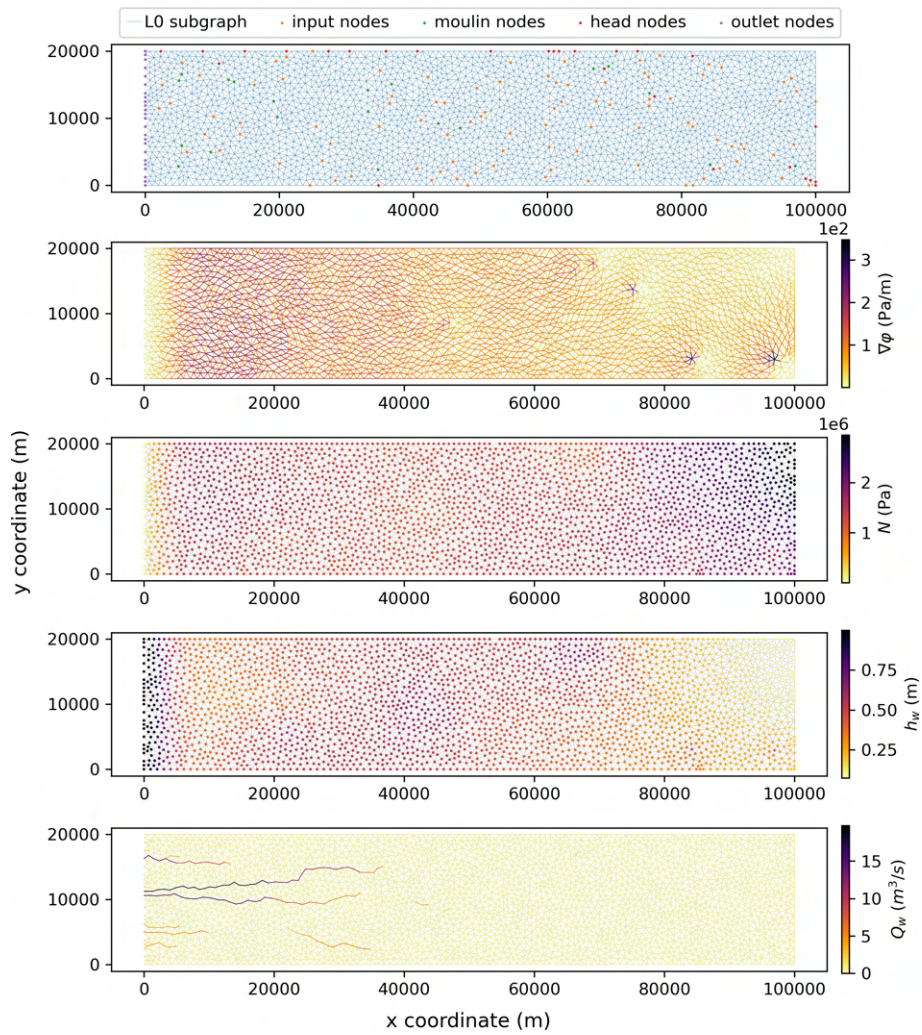

**Figure S10.** Graph representation of the model scenario B3 showing a) network geometry, b) the hydraulic potential gradient (Pa/m) on edges c) effective pressure (Pa) on nodes d) thickness of distributed water flow 'sheet' (m) on nodes and e) the channelised water flux on edges ( $\text{m}^3/\text{s}$ )

## 1.2.4 B4

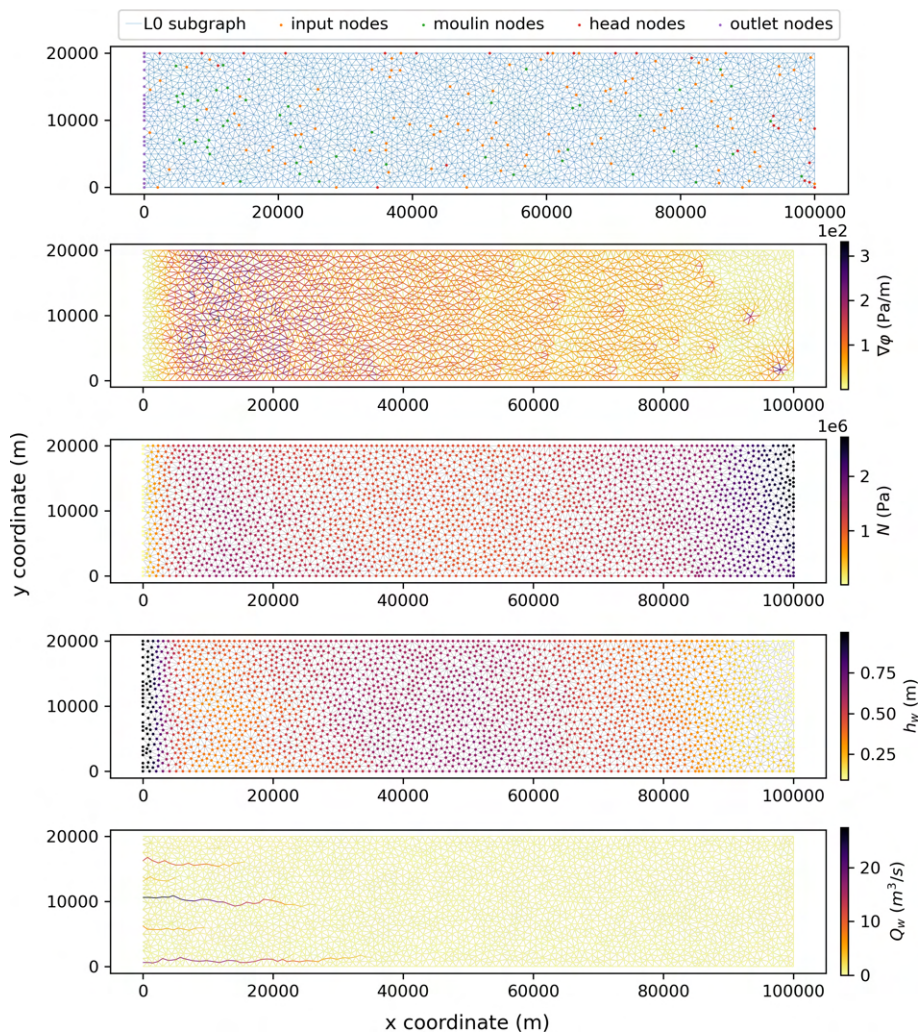

**Figure S11.** Graph representation of the model scenario B4 showing a) network geometry, b) the hydraulic potential gradient (Pa/m) on edges c) effective pressure (Pa) on nodes d) thickness of distributed water flow 'sheet' (m) on nodes and e) the channelised water flux on edges ( $\text{m}^3/\text{s}$ )

## 1.2.5 B5

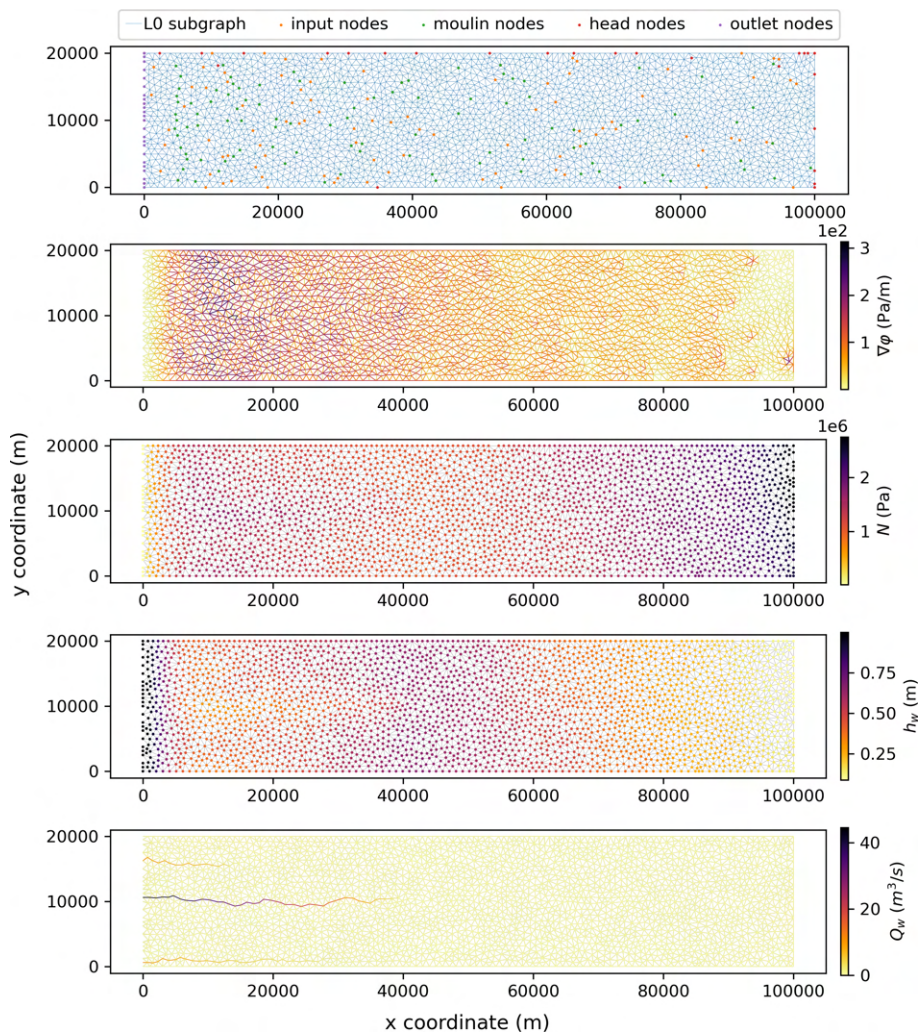

35

**Figure S12.** Graph representation of the model scenario B5 showing a) network geometry, b) the hydraulic potential gradient (Pa/m) on edges c) effective pressure (Pa) on nodes d) thickness of distributed water flow 'sheet' (m) on nodes and e) the channelised water flux on edges ( $\text{m}^3/\text{s}$ )

## 1.2.6 Edge-betweenness Centrality

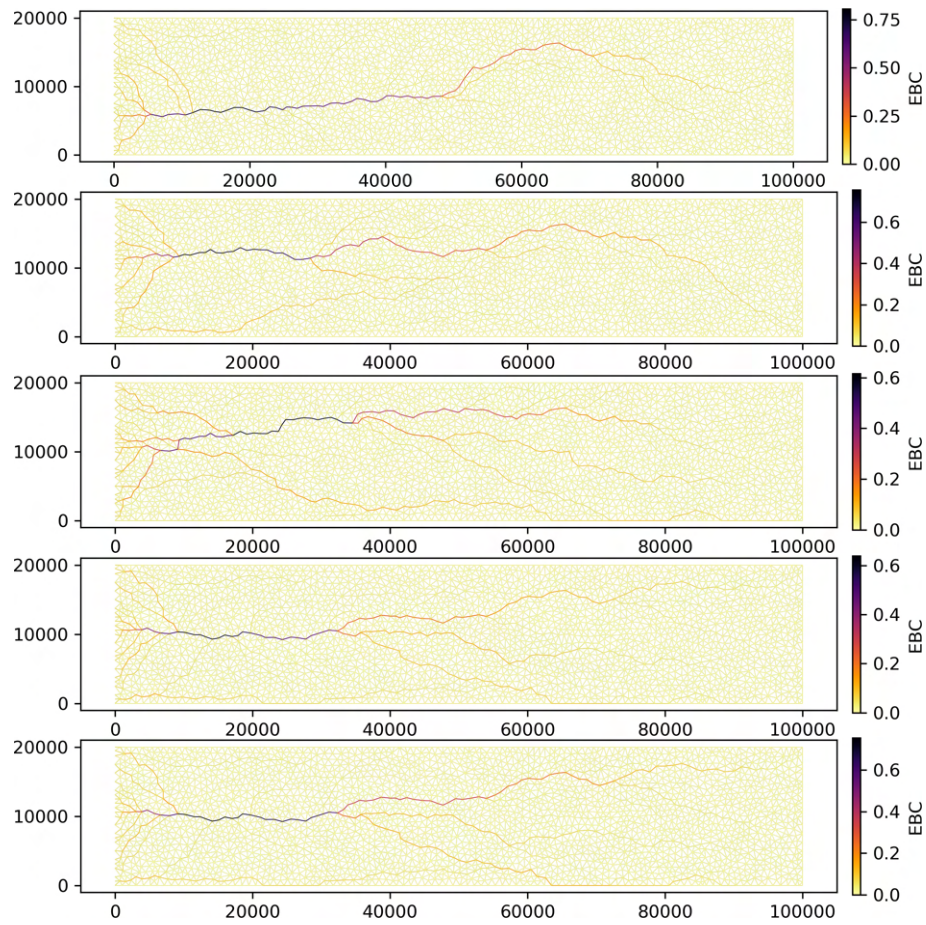

40

**Figure S13.** Edge-betweenness centrality (EBC) with increasing moulins a) B1  $n=1$  b) B2  $n=10$  c) B3  $n=20$  d) B4  $n=50$  and e) B5  $n=100$

## 1.2.7 L1 and L2 networks

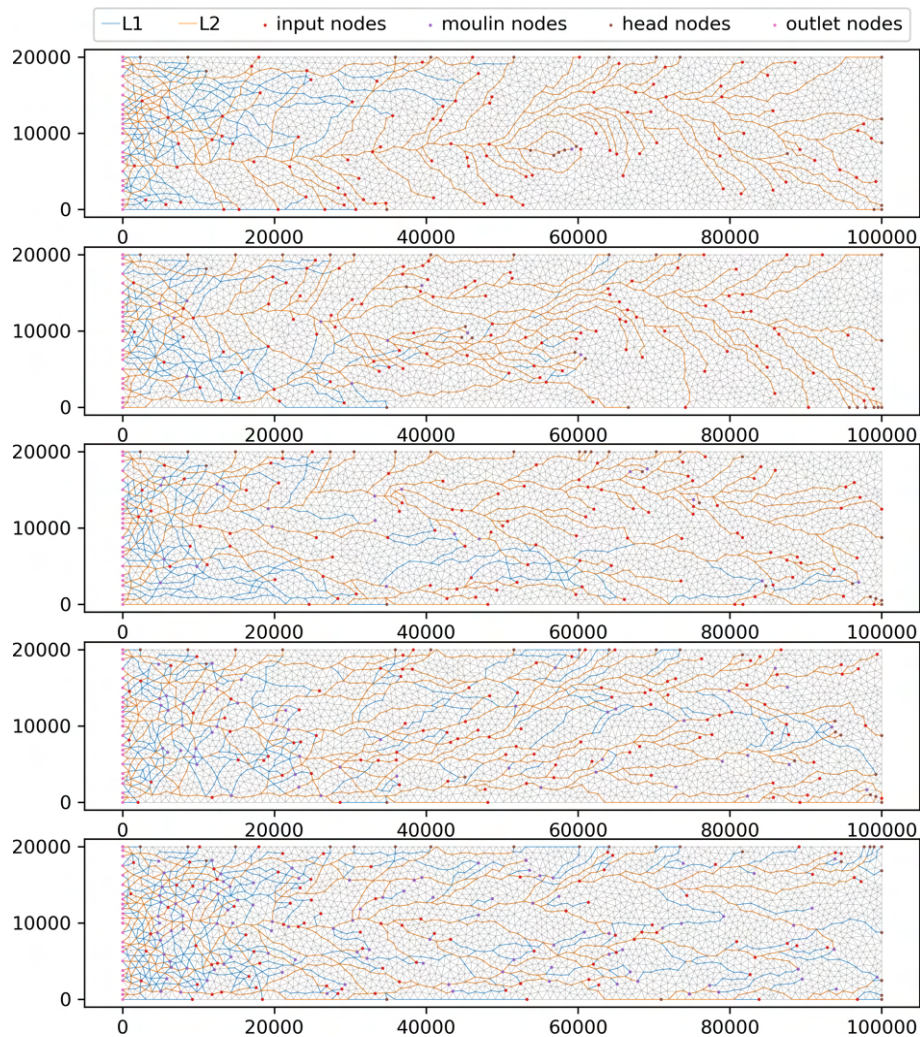

45

**Figure S14.** L1 and L2 networks for increasing moulines a) B1  $n = 1$  b) B2  $n = 10$  c) B3  $n = 20$  d) B4  $n = 50$  and e) B5  $n = 100$

### 1.3 C-Series models

#### 1.3.1 C series beginning and C0

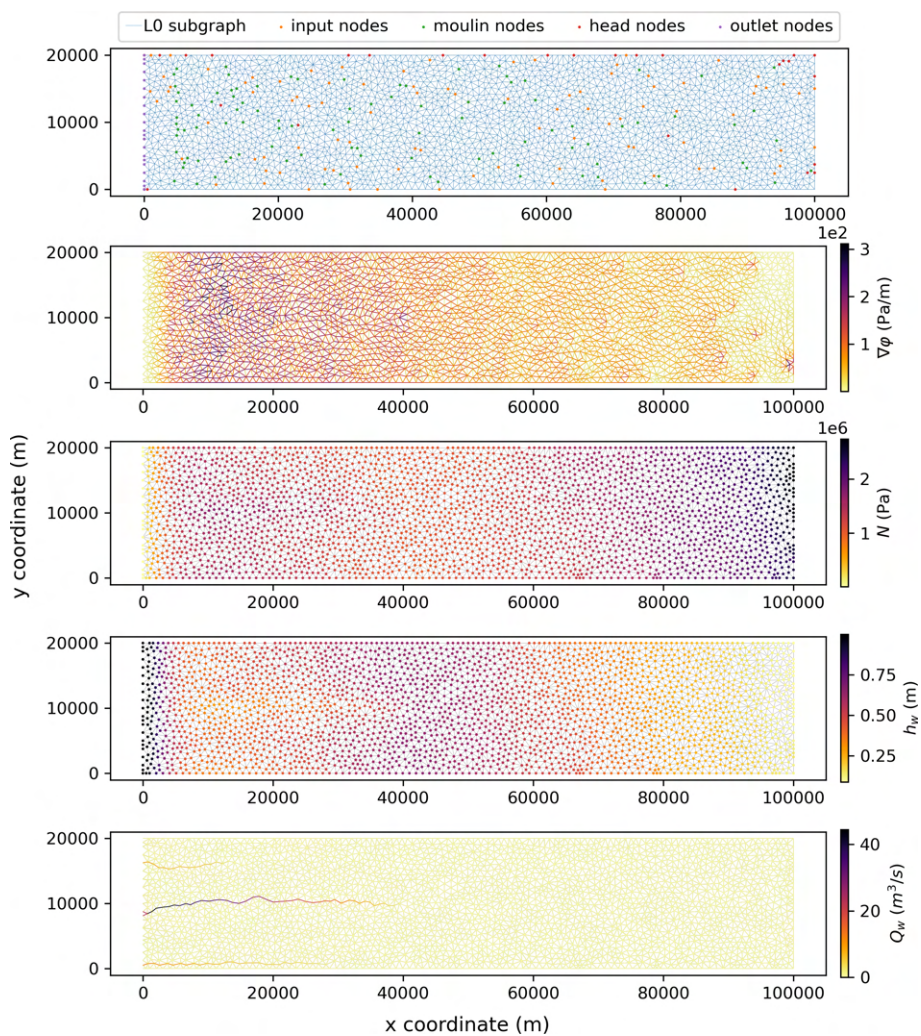

50

**Figure S15.** Graph representation of the model scenario C1 at timestep 0 showing a) network geometry, b) the hydraulic potential gradient (Pa/m) on edges c) effective pressure (Pa) on nodes d) thickness of distributed water flow 'sheet' (m) on nodes and e) the channelised water flux on edges (m<sup>3</sup>/s). C0 has this configuration throughout

### 1.3.2 C1 end

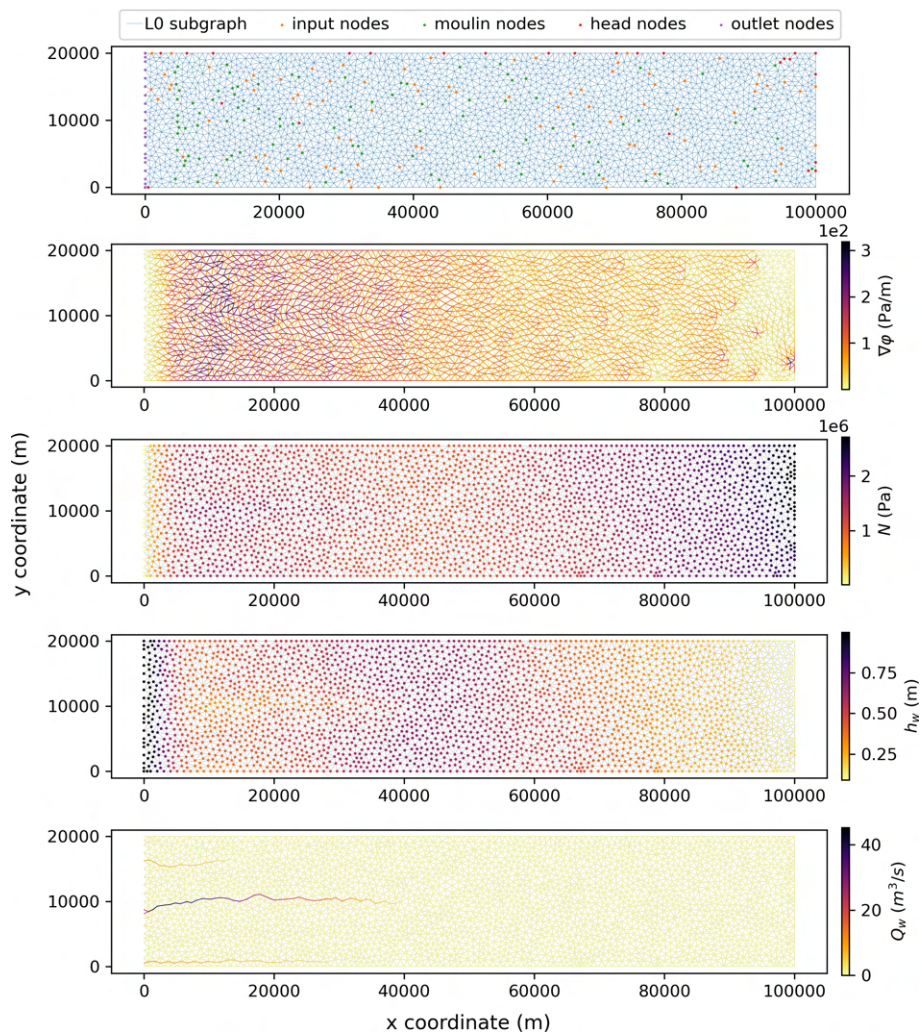

**Figure S16.** Graph representation of the model scenario C1 at the end of day 49 showing a) network geometry, b) the hydraulic potential gradient (Pa/m) on edges c) effective pressure (Pa) on nodes d) thickness of distributed water flow 'sheet' (m) on nodes and e) the channelised water flux on edges ( $\text{m}^3/\text{s}$ )



### 1.3.3 C2 end

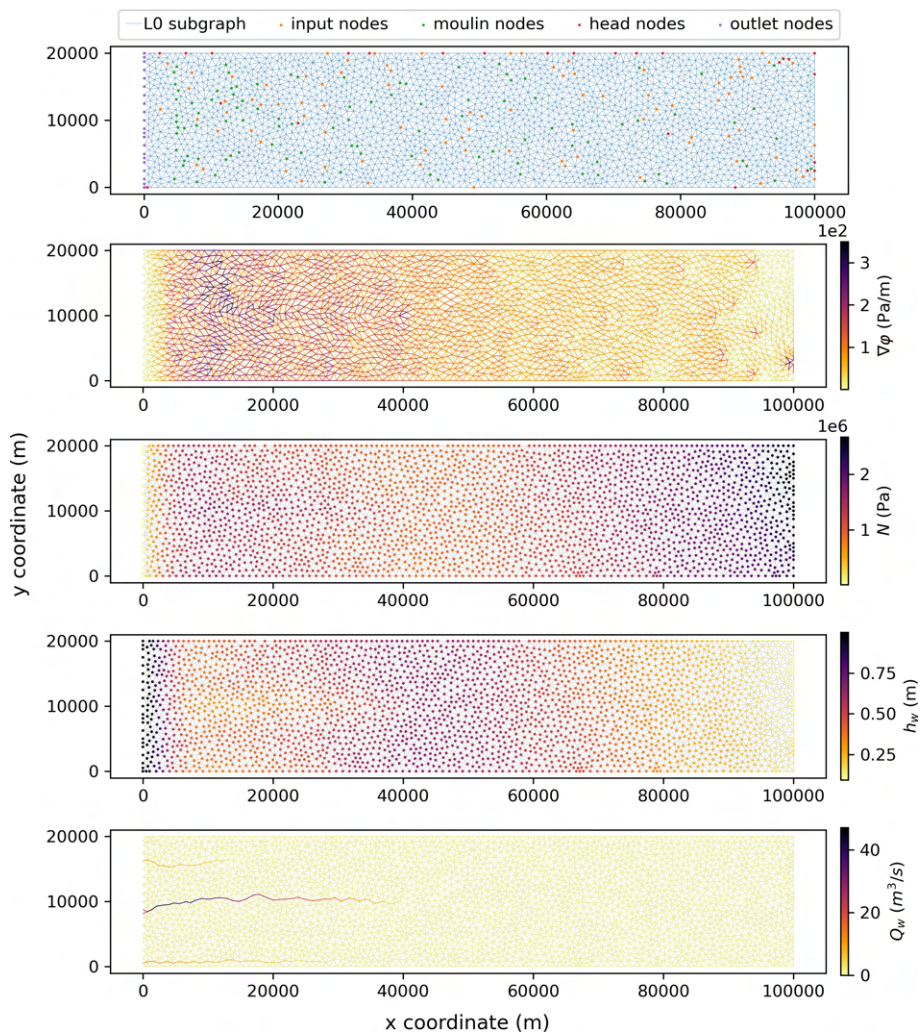

**Figure S17.** Graph representation of the model scenario C2 at the end of day 49 showing a) network geometry, b) the hydraulic potential gradient (Pa/m) on edges c) effective pressure (Pa) on nodes d) thickness of distributed water flow 'sheet' (m) on nodes and e) the channelised water flux on edges ( $m^3/s$ )

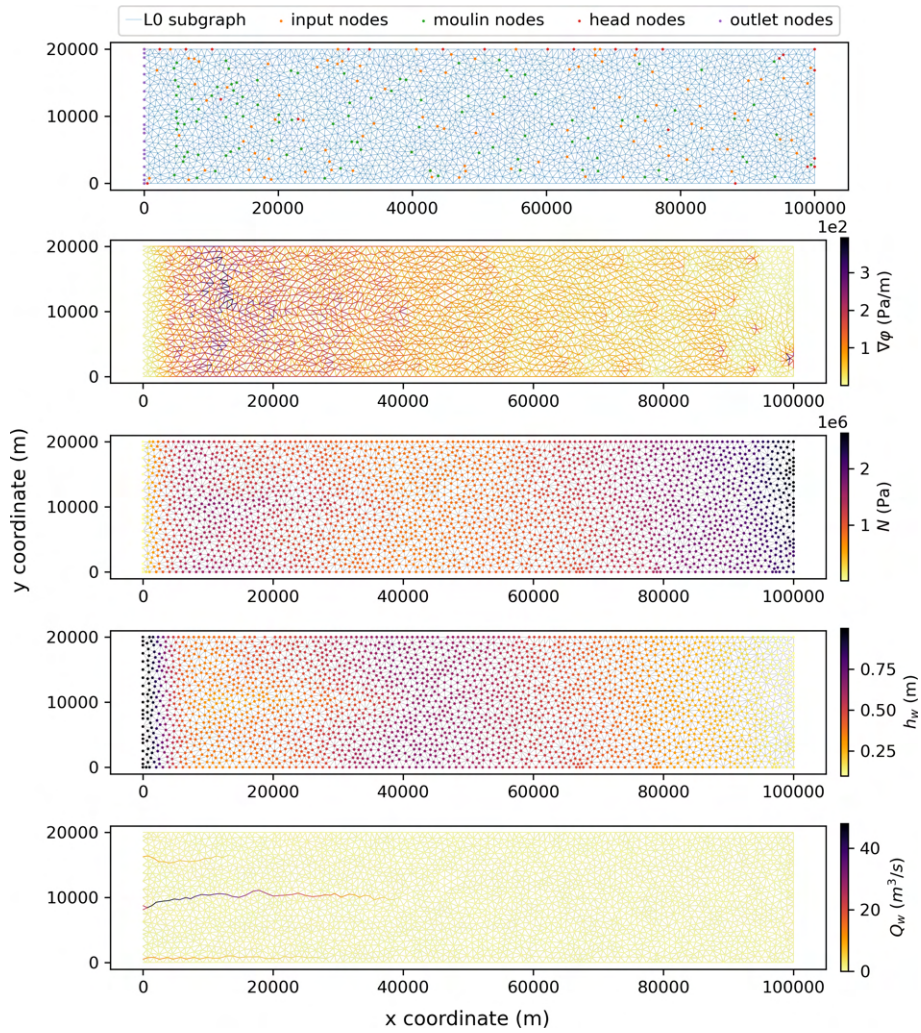

**Figure S18.** Graph representation of the model scenario C3 at the end of day 49 showing a) network geometry, b) the hydraulic potential gradient (Pa/m) on edges c) effective pressure (Pa) on nodes d) thickness of distributed water flow 'sheet' (m) on nodes and e) the channelised water flux on edges ( $\text{m}^3/\text{s}$ )

### 1.3.5 C4 end

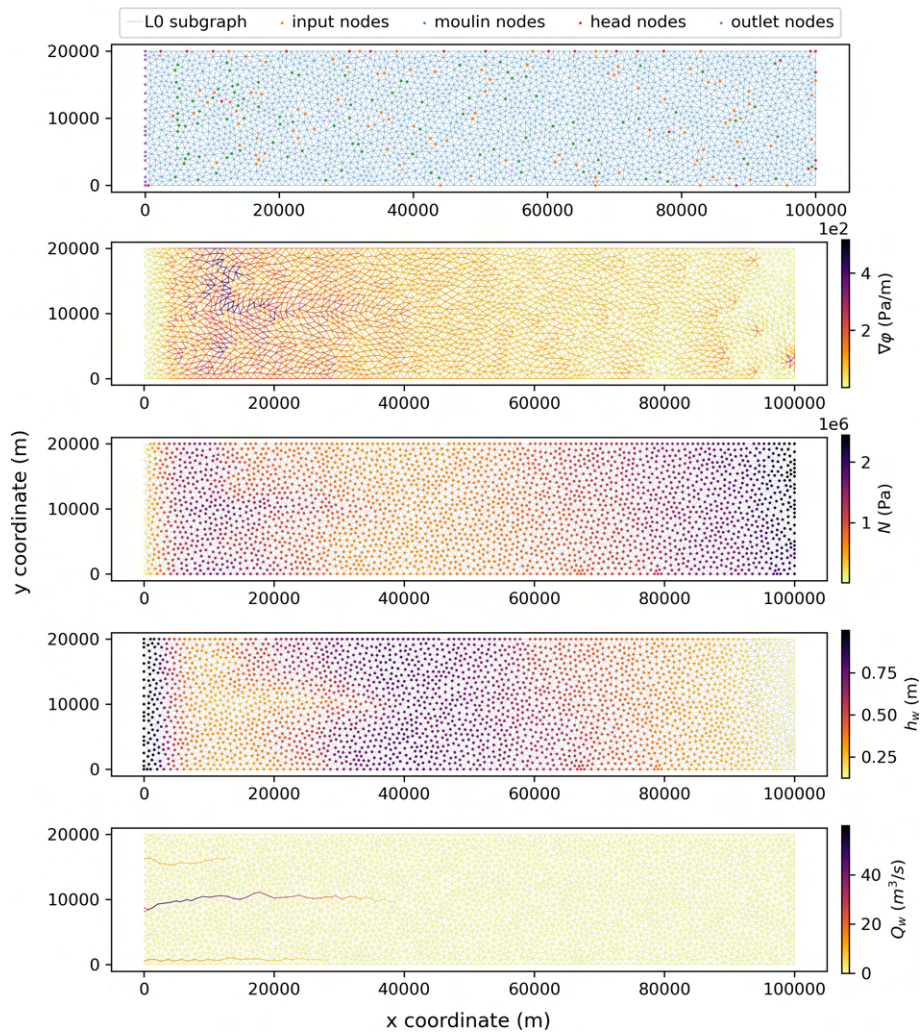

**Figure S19.** Graph representation of model scenario C4 at the end of day 49 showing a) network geometry, b) the hydraulic potential gradient (Pa/m) on edges c) effective pressure (Pa) on nodes d) thickness of distributed water flow 'sheet' (m) on nodes and e) the channelised water flux on edges ( $\text{m}^3/\text{s}$ )

### 1.3.6 Edge-betweenness Centrality

60

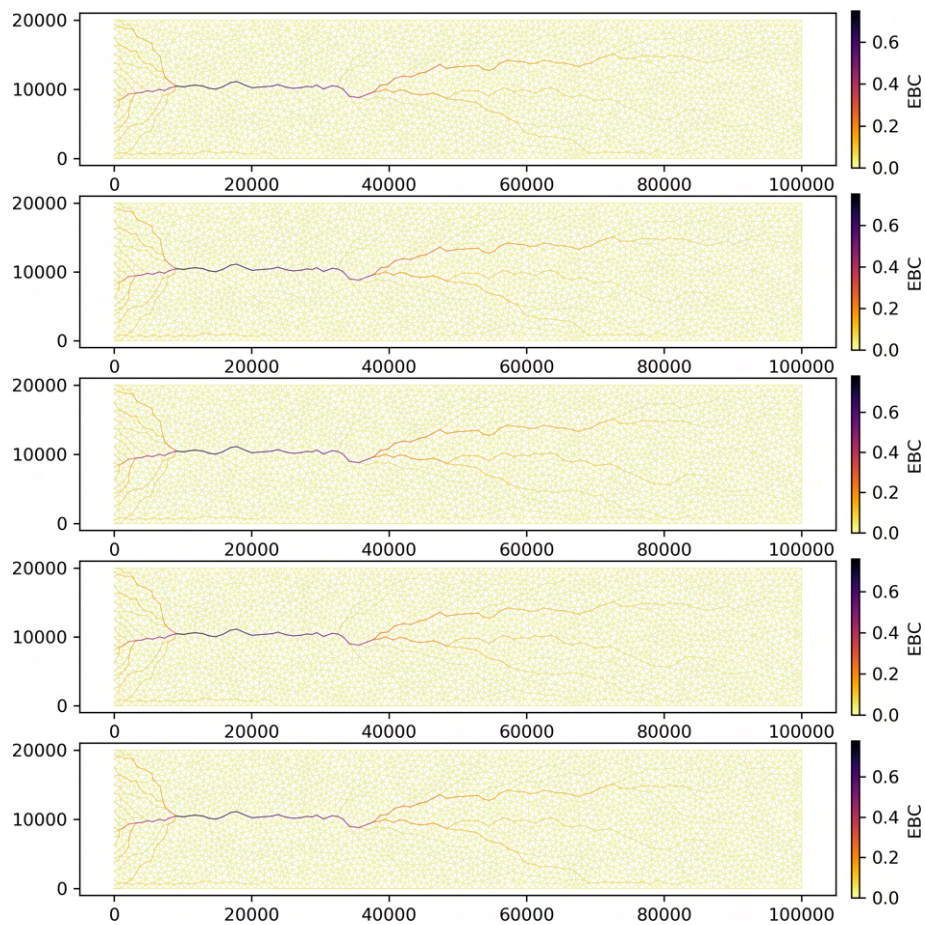

**Figure S20.** Edge-betweenness centrality (EBC) for a) C1 at timestep 0 b) C1 at timestep 1200 c) C2 at timestep 1200 d) C3 at timestep 1200 e) C4 at timestep 1200

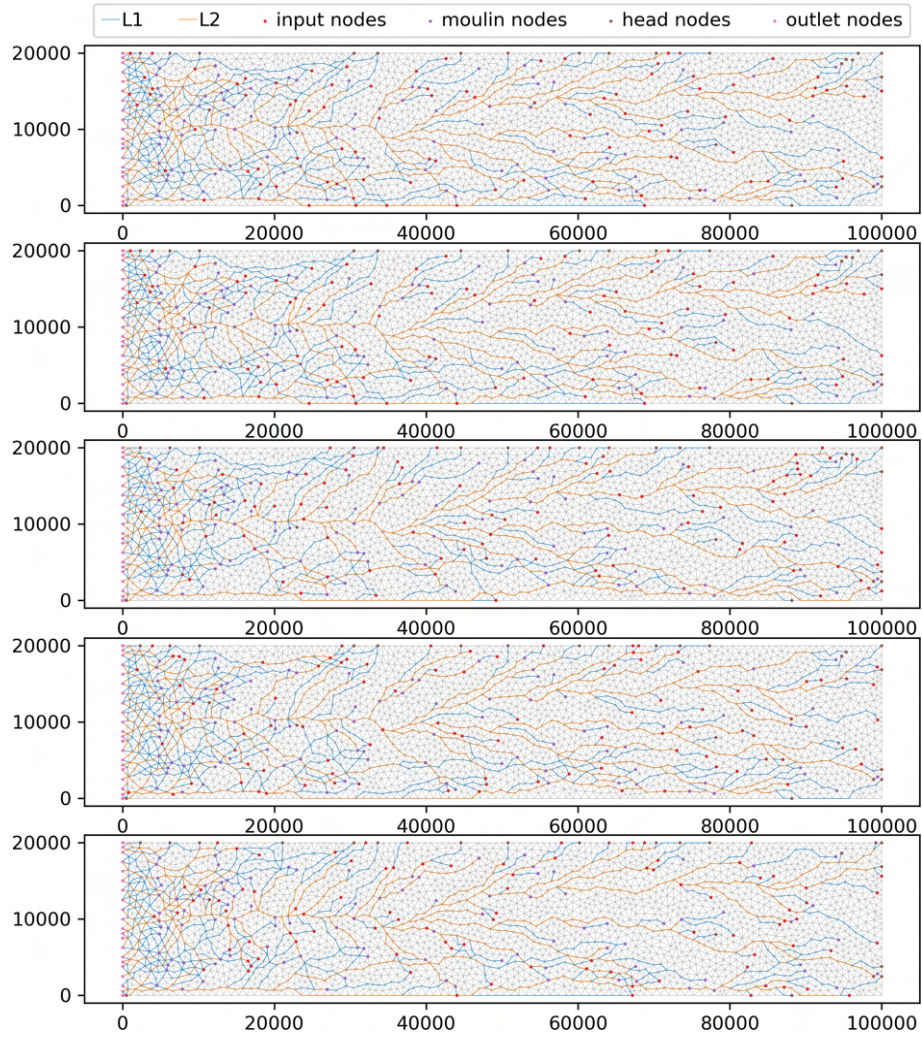

70

**Figure S21.** L1 and L2 networks for a) C1 at timestep 0 b) C1 at timestep 1200 c) C2 at timestep 1200 d) C3 at timestep 1200 e) C4 at timestep 1200

## 2 Experiment Sets

### 2.1 Experiment Set 1

#### 2.1.1 A4 reference

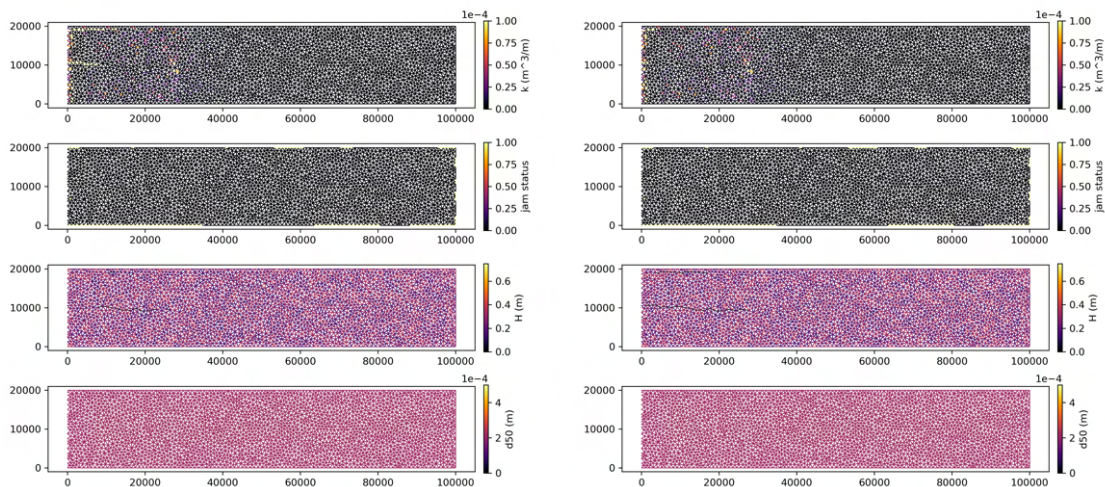

Figure S22. Results for the A4 reference model run at a) week 0 and b) week 25

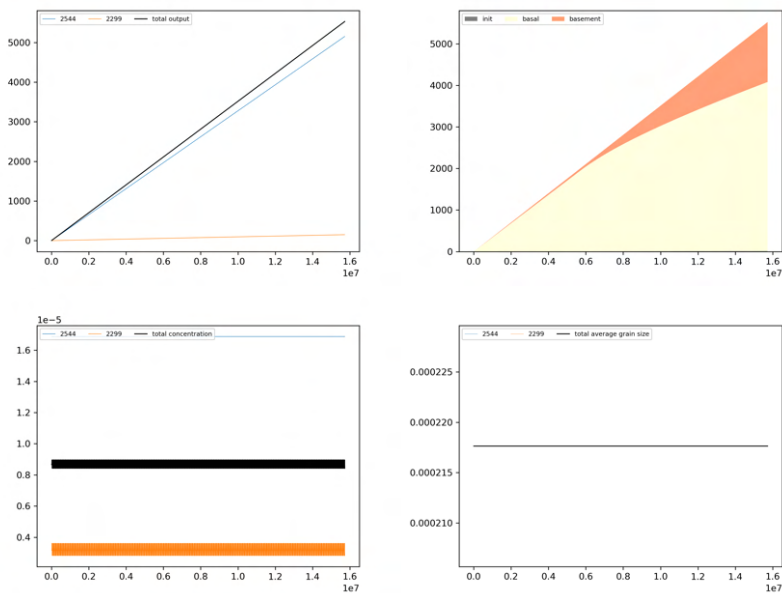

Figure S23. Outputs from the A4 reference model run with a) volume flux b) detritus volume flux c) concentration d) grain size. In a, c and d numbers indicate outlet node IDs

## 2.1.2 A4 default

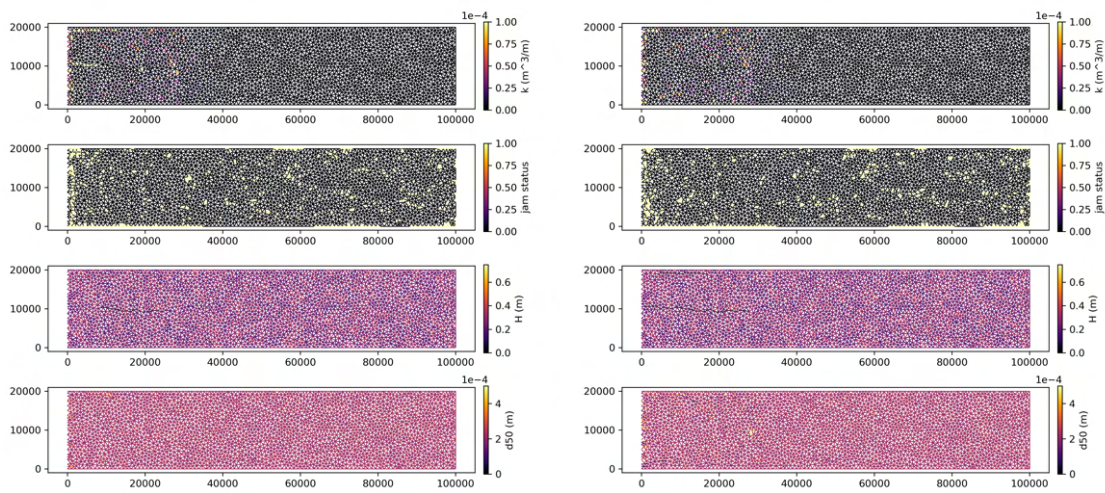

**Figure S24.** Results for the A4 default model run at a) week 0 and b) week 25

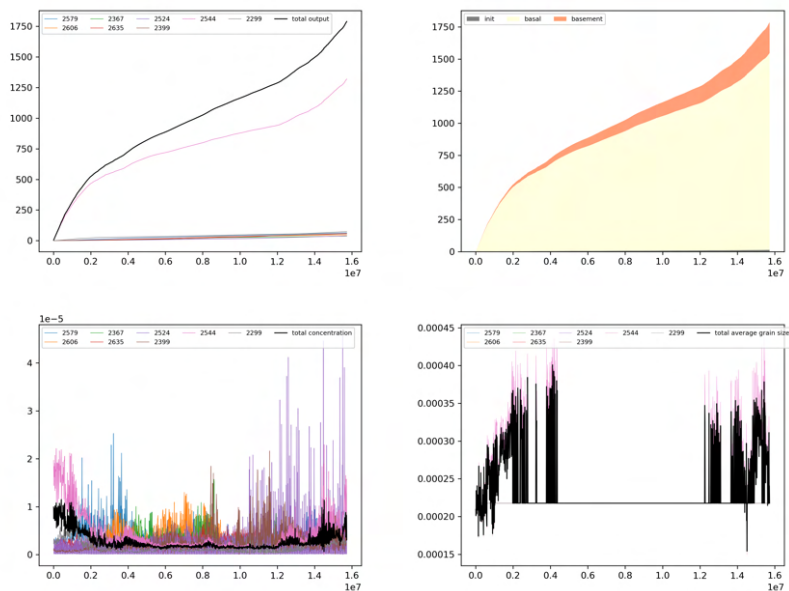

**Figure S25.** Outputs from the A4 default model run with a) volume flux b) detritus volume flux c) concentration d) grainsize. In a, c and d numbers indicate outlet node IDs

### 2.1.3 A4 default rerun

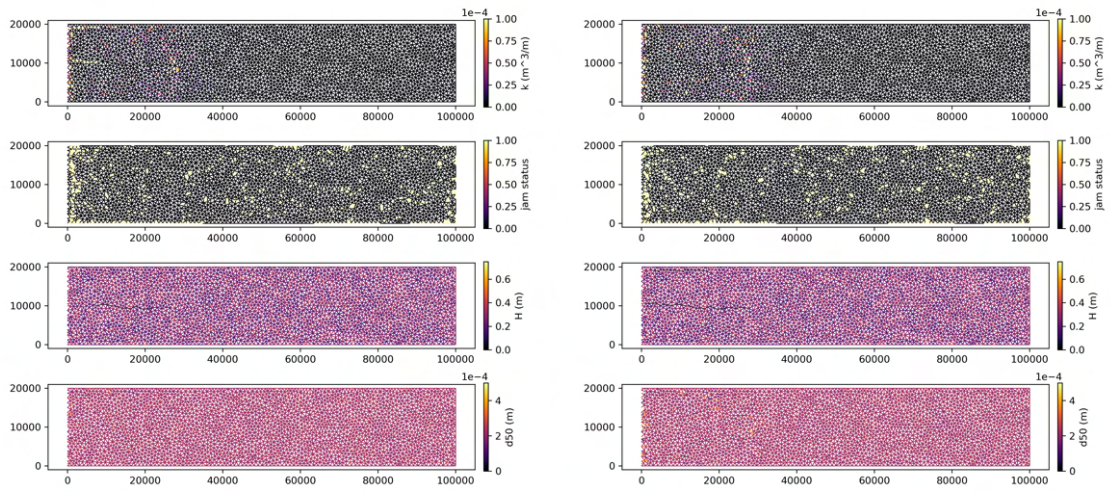

**Figure S26.** Results for the A4 default model rerun at a) week 0 and b) week 25

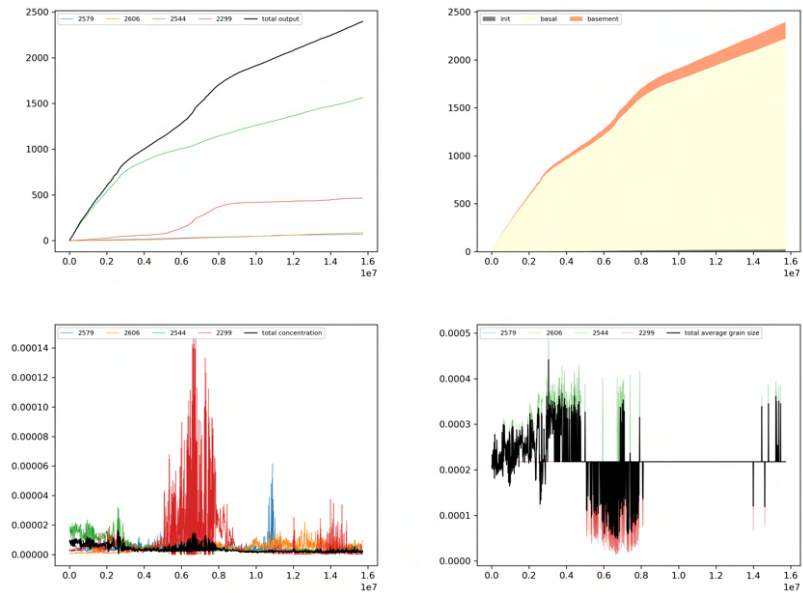

**Figure S27.** Outputs from the A4 default model rerun with a) volume flux b) detritus volume flux c) concentration d) grainsize. In a, c and d numbers indicate outlet node IDs



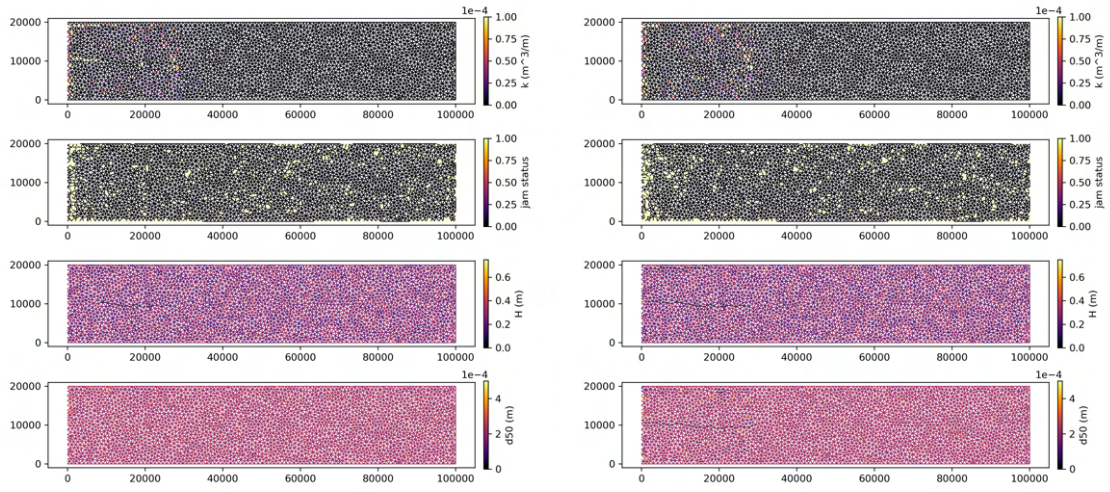

Figure S28. Results for the A4D default model run at a) week 0 and b) week 25

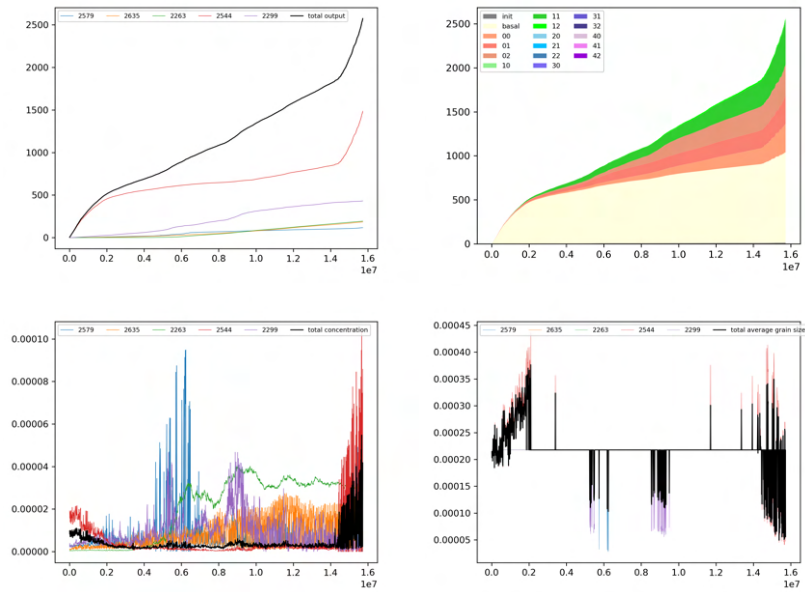

Figure S29. Outputs from the A4D default model run with a) volume flux b) detritus volume flux c) concentration d) grainsize. In a, c and d numbers indicate outlet node IDs

## 2.1.5 A4D default rerun

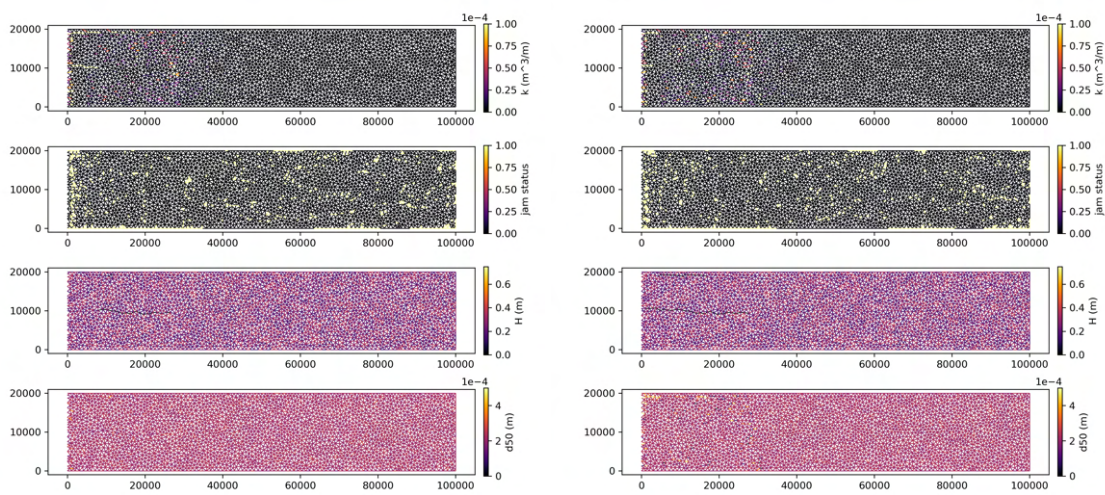

90

**Figure S30.** Results for the A4D default model rerun at a) week 0 and b) week 25

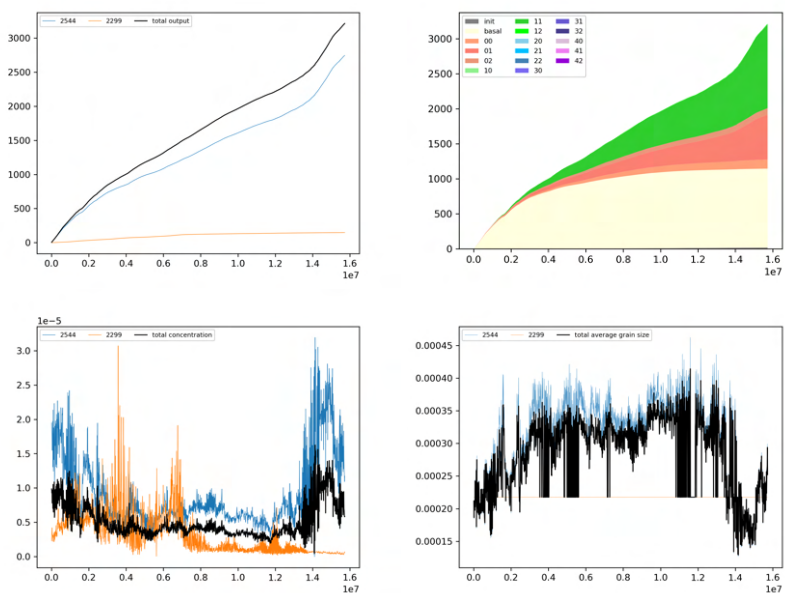

**Figure S31.** Outputs from the A4D default model rerun with a) volume flux b) detritus volume flux c) concentration d) grainsize. In a, c and d numbers indicate outlet node IDs

## 2.1.6 A5 reference

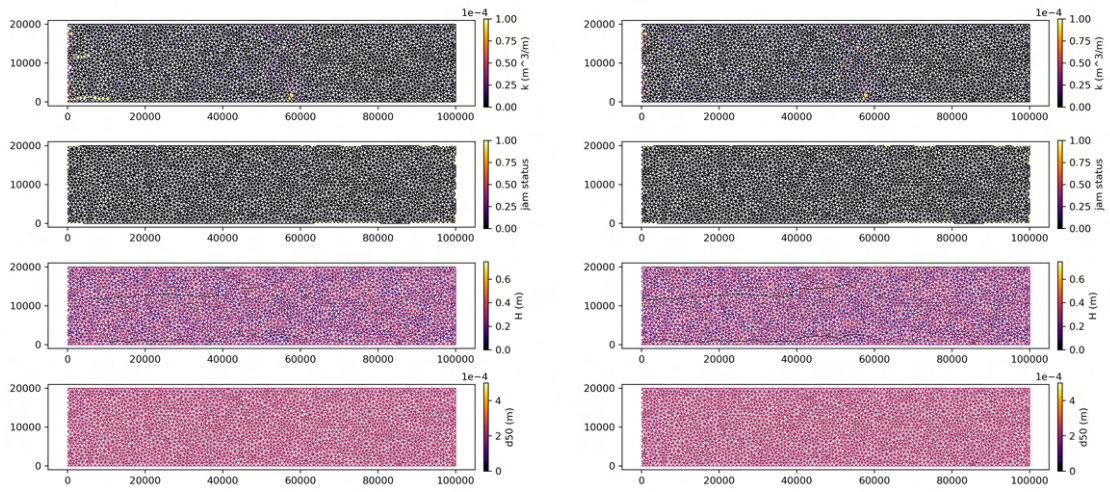

**Figure S32.** Results for the A5 reference model run at a) week 0 and b) week 25

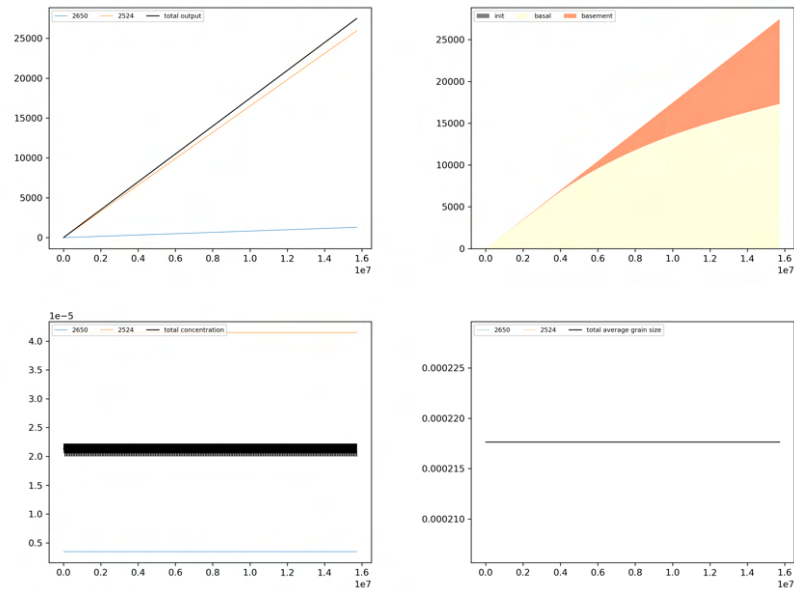

**Figure S33.** Outputs from the A5 reference model run with a) volume flux b) detritus volume flux c) concentration d) grainsize. In a, c and d numbers indicate outlet node IDs

## 2.1.7 A5 default

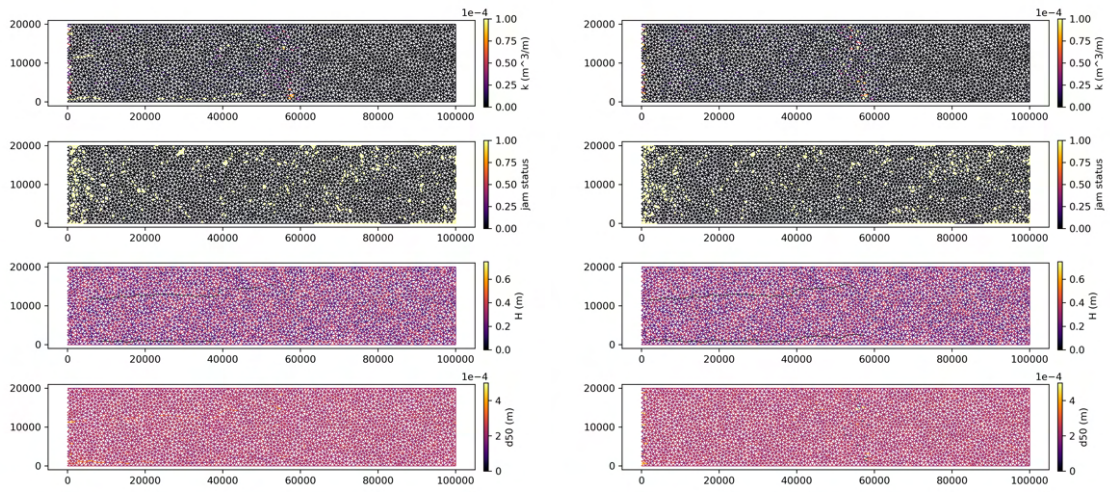

**Figure S34.** Results for the A5 default model run at a) week 0 and b) week 25

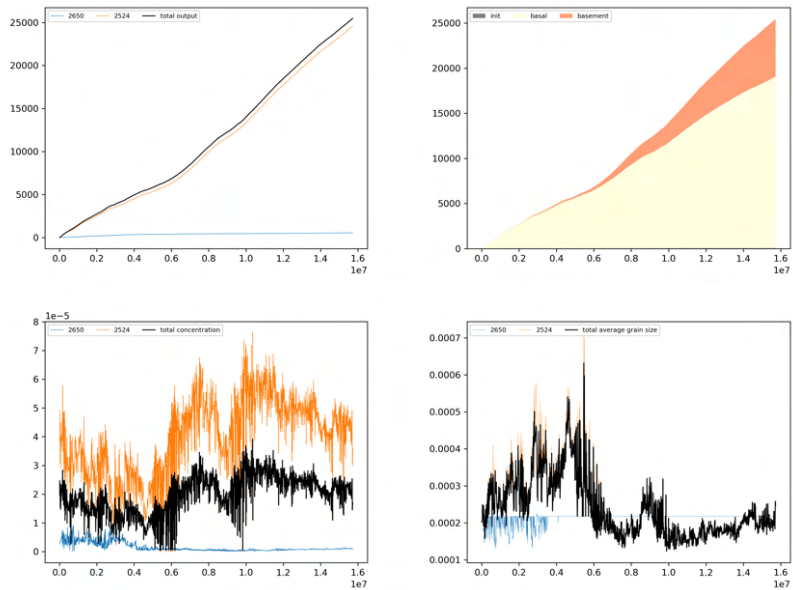

**Figure S35.** Outputs from the A5 default model run with a) volume flux b) detritus volume flux c) concentration d) grainsize. In a, c and d numbers indicate outlet node IDs

## 2.1.8 A5 default rerun

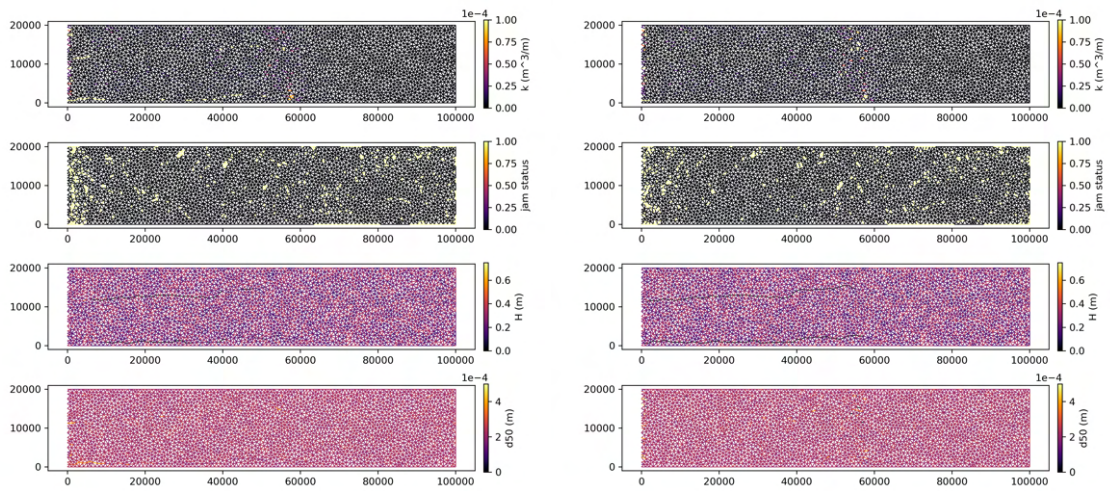

**Figure S36.** Results for the A5 default model rerun at a) week 0 and b) week 25

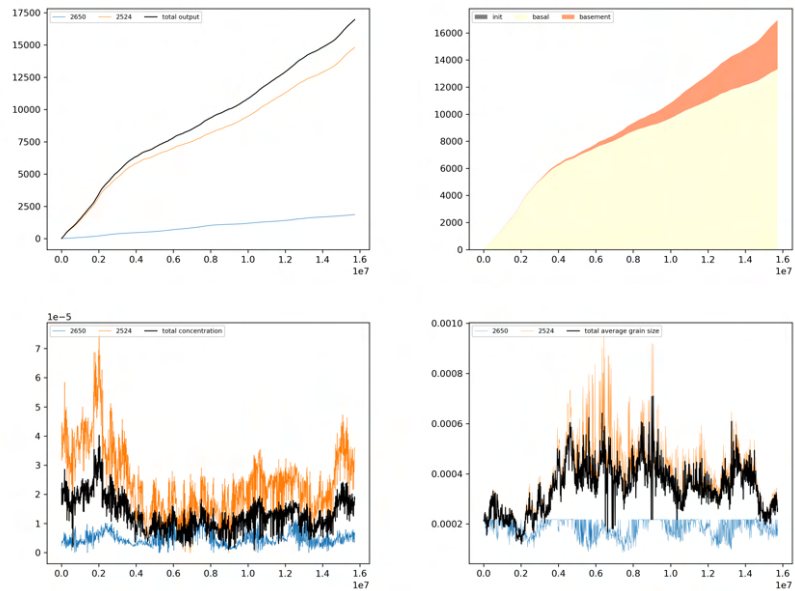

**Figure S37.** Outputs from the A5 default model rerun with a) volume flux b) detritus volume flux c) concentration d) grainsize. In a, c and d numbers indicate outlet node IDs

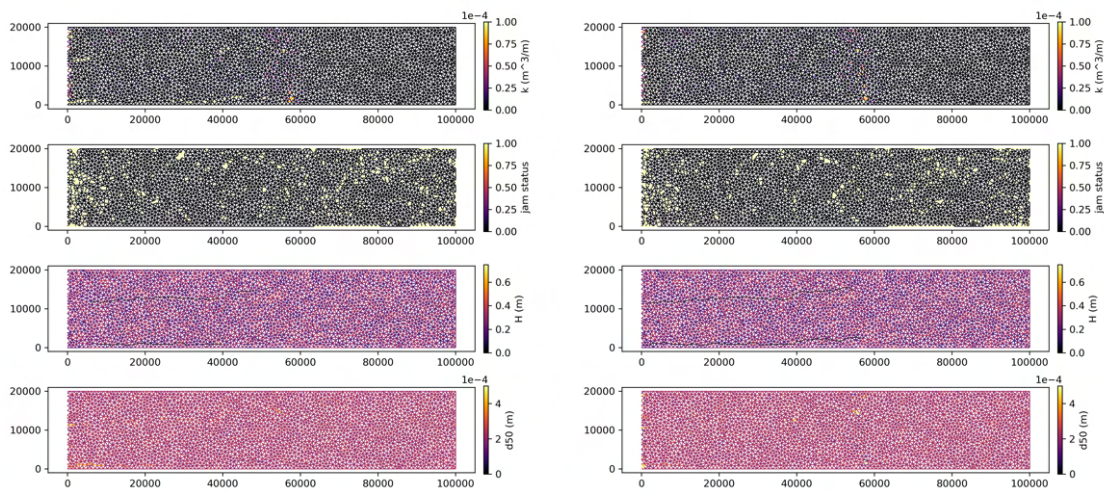

Figure S38. Results for the A5D default model run at a) week 0 and b) week 25

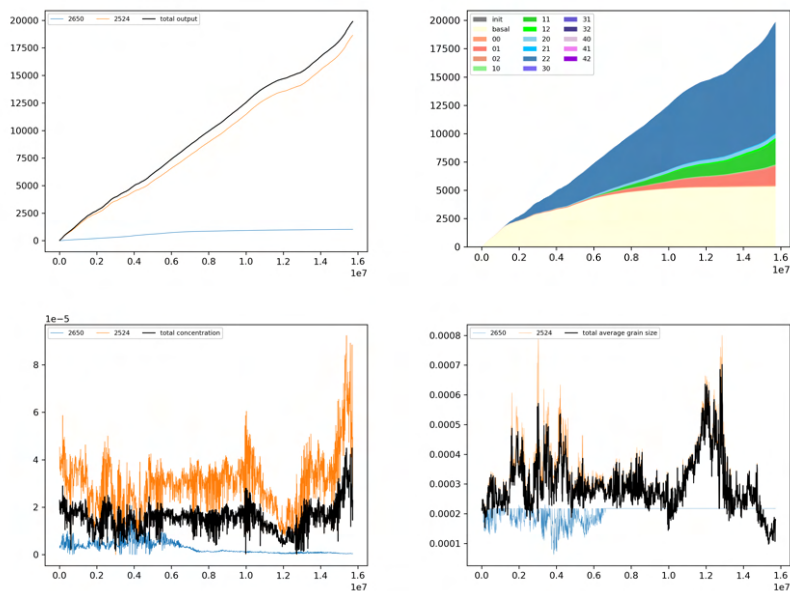

Figure S39. Outputs from the A5D default model run with a) volume flux b) detritus volume flux c) concentration d) grainsize. In a, c and d numbers indicate outlet node IDs

## 2.1.10 ASD default rerun

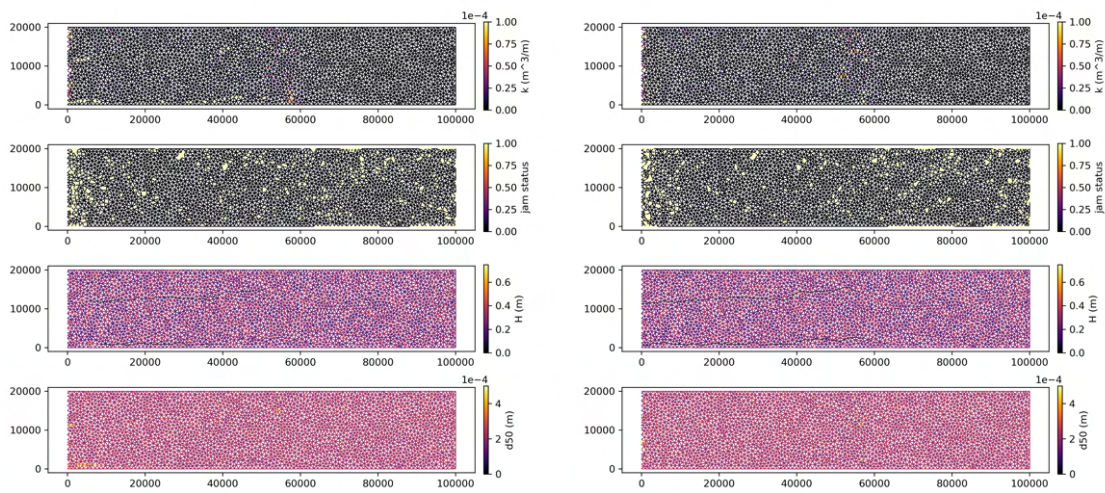

110

**Figure S40.** Results for the ASD default model rerun at a) week 0 and b) week 25

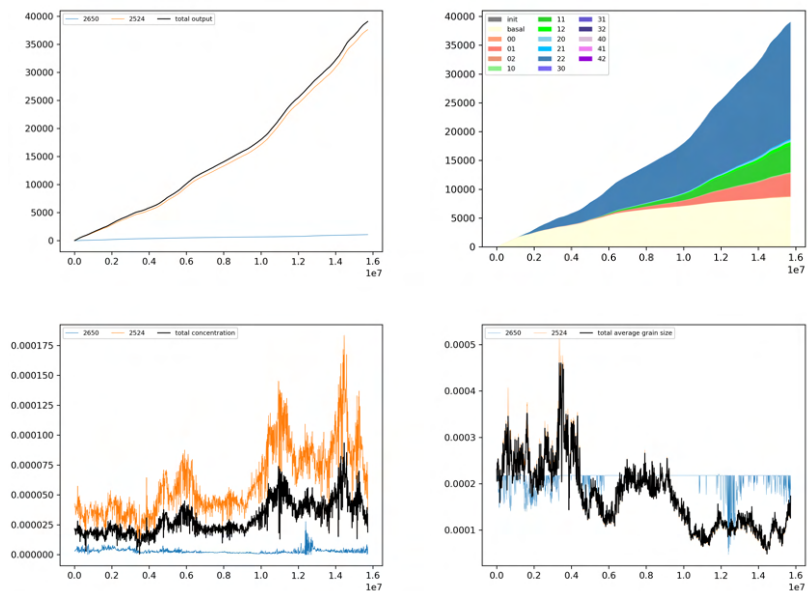

**Figure S41.** Outputs from the ASD default model rerun with a) volume flux b) detritus volume flux c) concentration d) grainsize. In a, c and d numbers indicate outlet node IDs

## 2.1.11 A7 reference

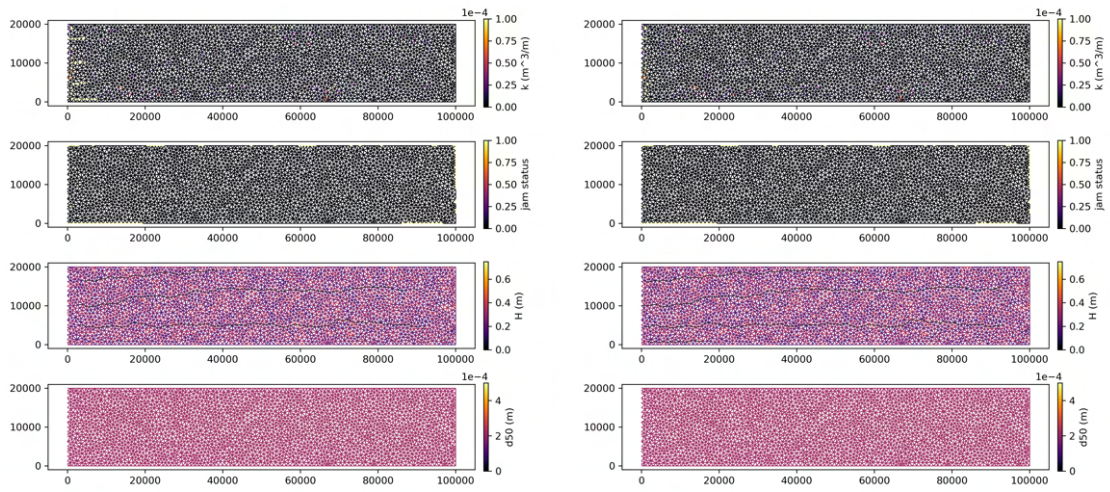

**Figure S42.** Results for the A7 reference model run at a) week 0 and b) week 25

115

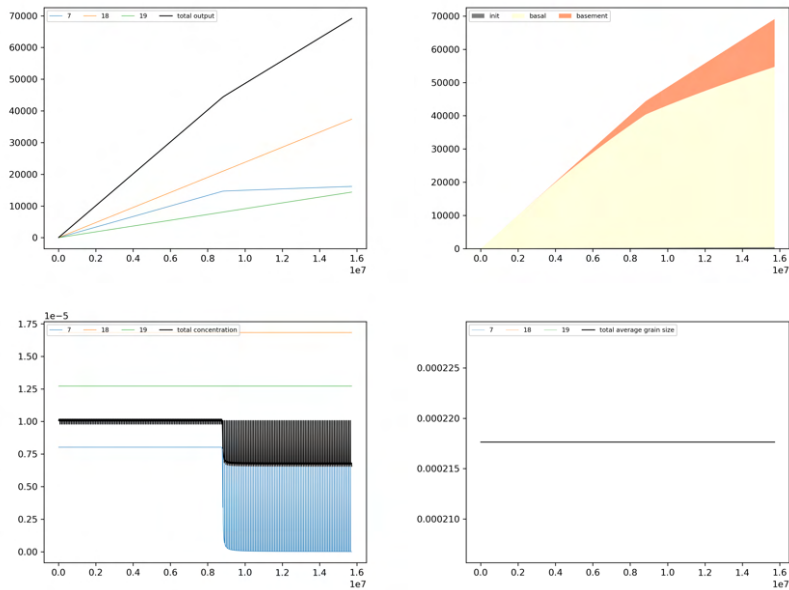

**Figure S43.** Outputs from the A7 reference model run with a) volume flux b) detritus volume flux c) concentration d) grainsize. In a, c and d numbers indicate outlet node IDs



## 2.1.12 A7 default

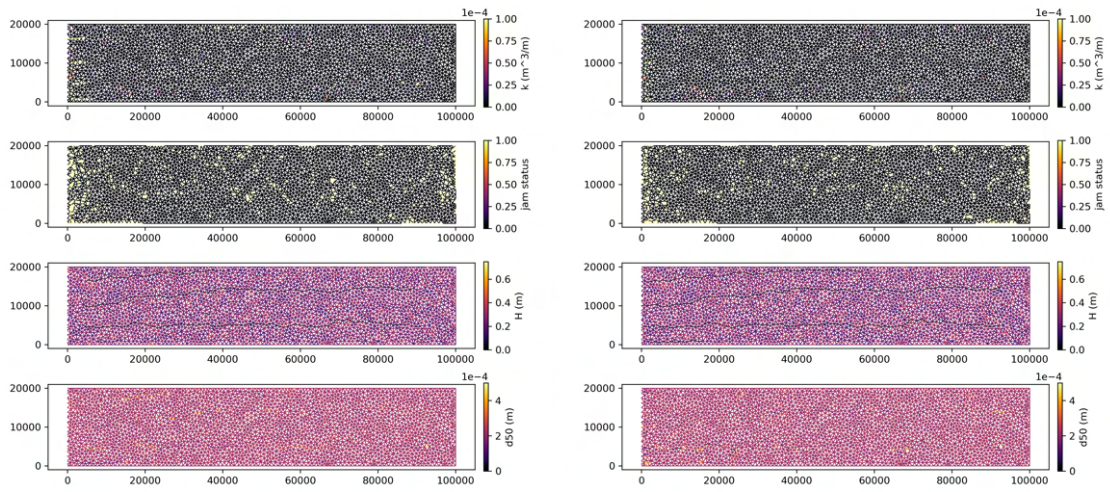

**Figure S44.** Results for the A7 default model run at a) week 0 and b) week 25

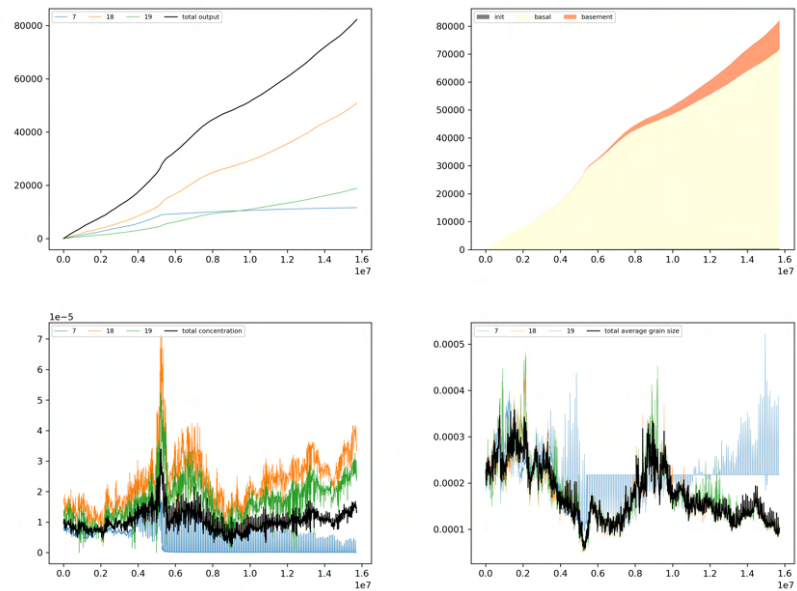

**Figure S45.** Outputs from the A7 default model run with a) volume flux b) detritus volume flux c) concentration d) grainsize. In a, c and d numbers indicate outlet node IDs

### 2.1.13 A7 default rerun

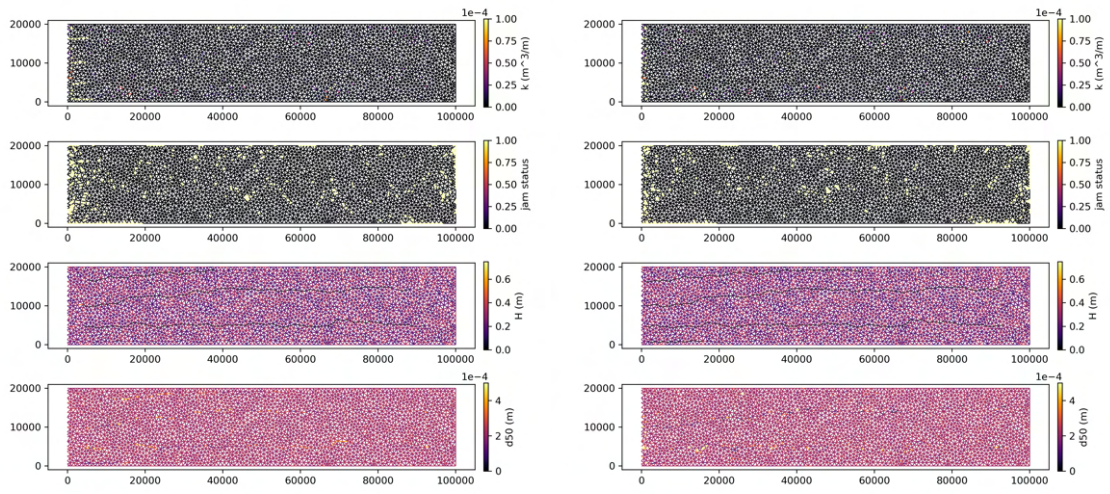

**Figure S46.** Results for the A7 default model rerun at a) week 0 and b) week 25

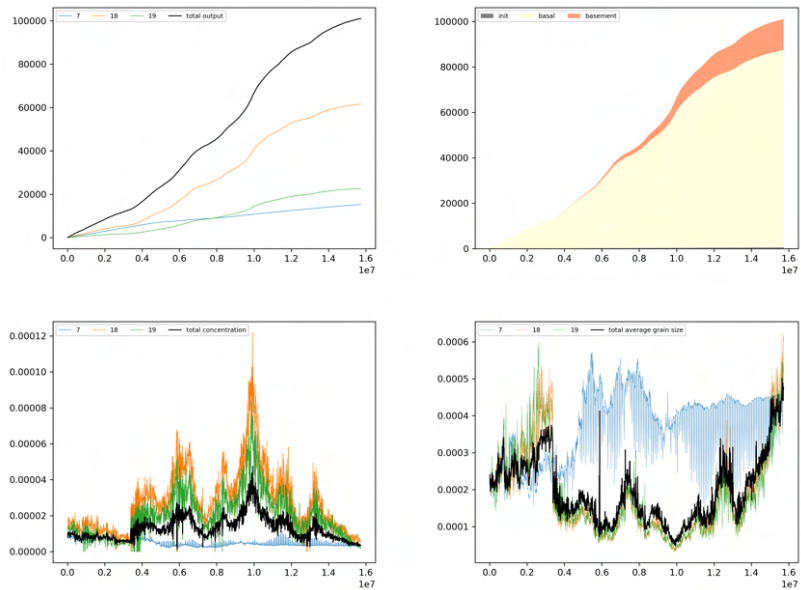

**Figure S47.** Outputs from the A7 default model rerun with a) volume flux b) detritus volume flux c) concentration d) grainsize. In a, c and d numbers indicate outlet node IDs

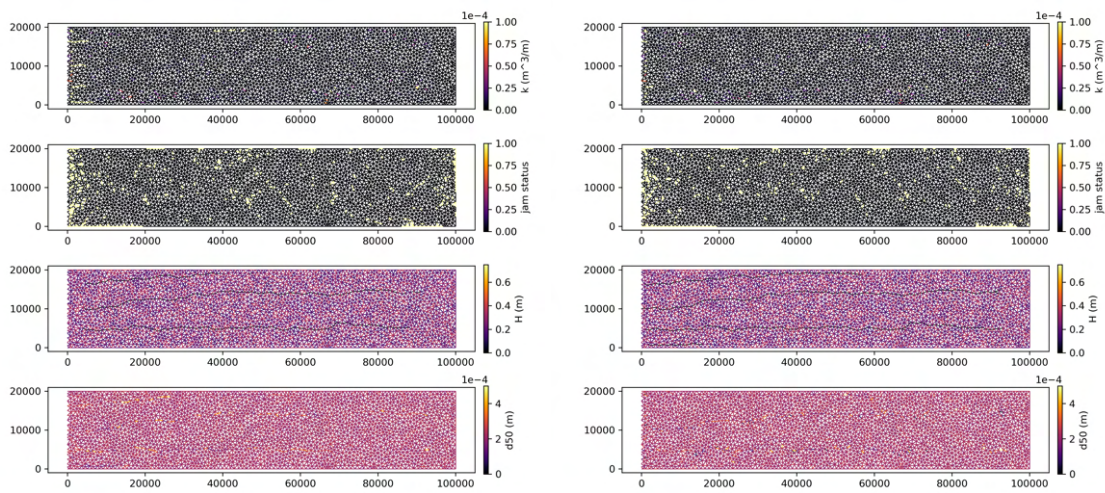

Figure S48. Results for the A7D default model run at a) week 0 and b) week 25

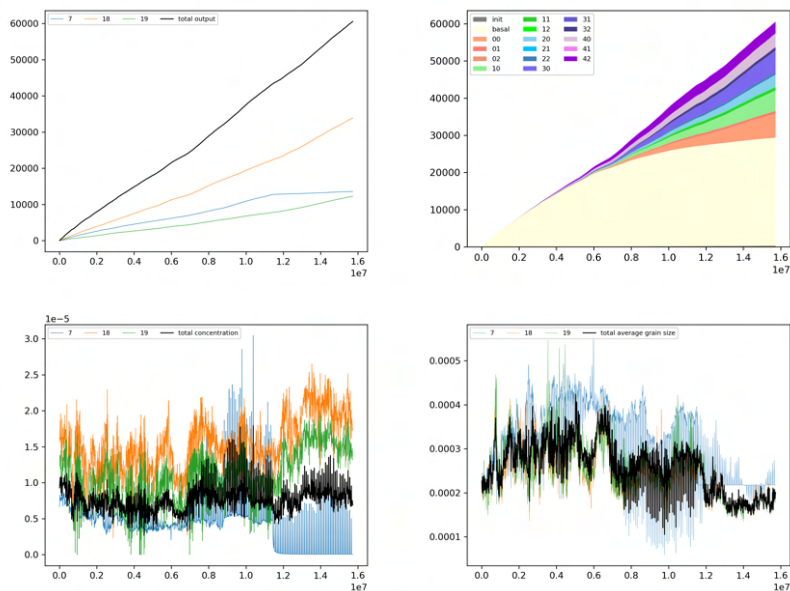

Figure S49. Outputs from the A7D default model run with a) volume flux b) detritus volume flux c) concentration d) grainsize. In a, c and d numbers indicate outlet node IDs

## 2.1.15 A7D default rerun

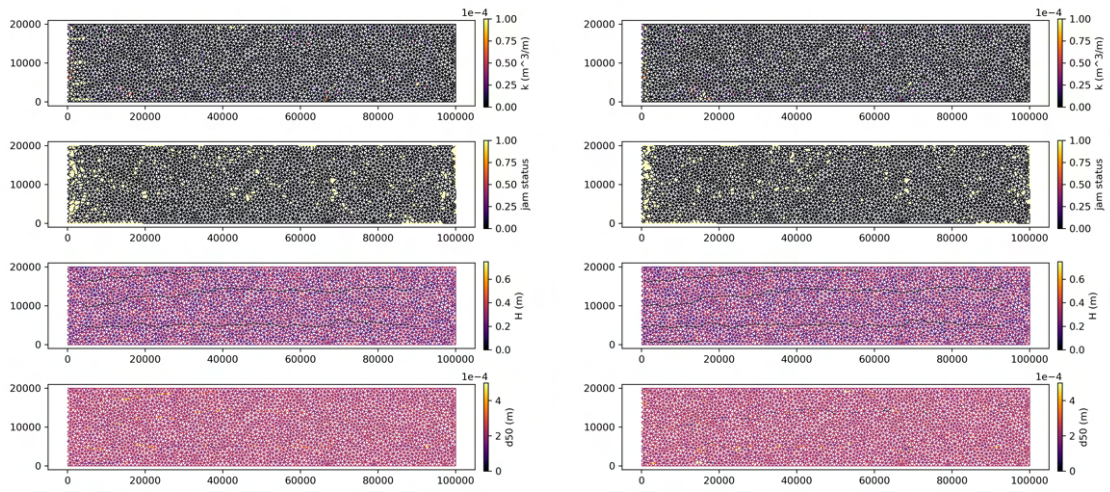

130

**Figure S50.** Results for the A7D default model rerun at a) week 0 and b) week 25

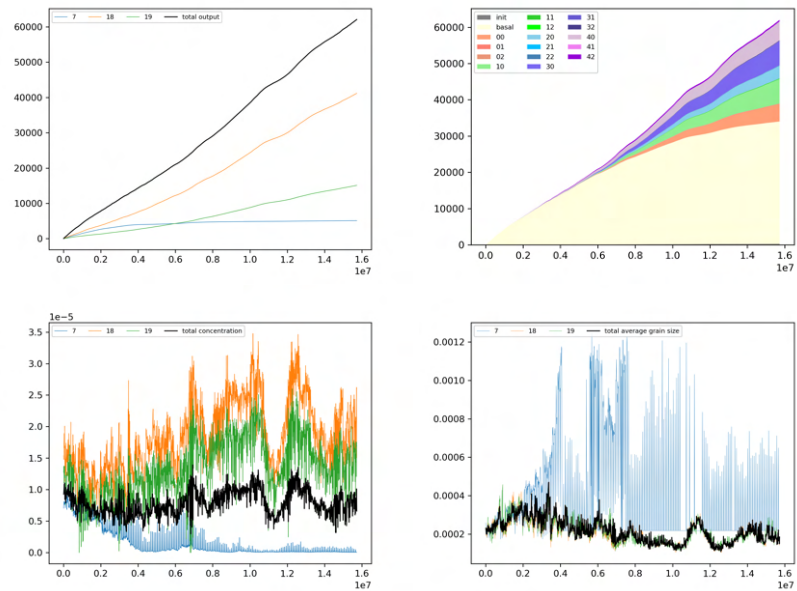

**Figure S51.** Outputs from the A7D default model rerun with a) volume flux b) detritus volume flux c) concentration d) grainsize. In a, c and d numbers indicate outlet node IDs

## 2.1.16 A8 reference

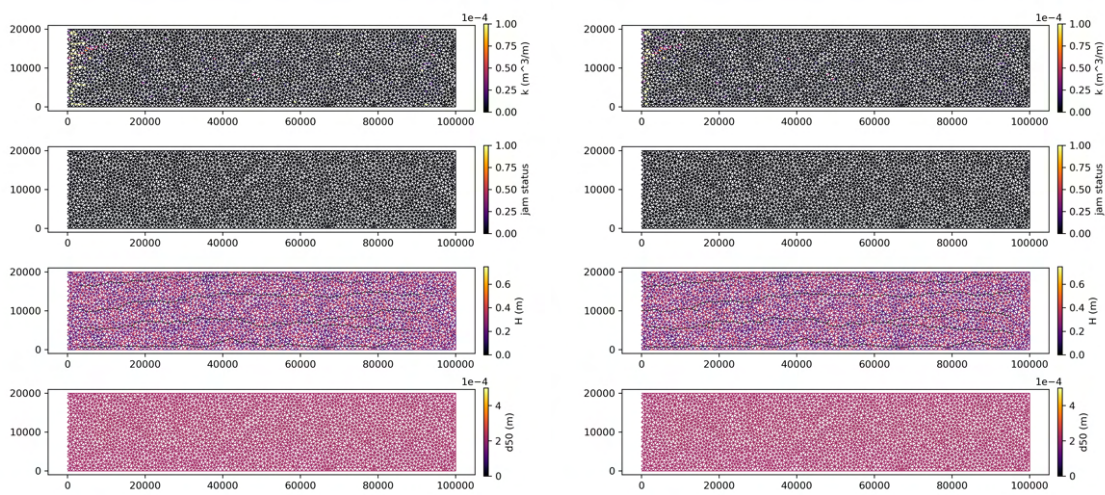

**Figure S52.** Results for the A8 reference model run at a) week 0 and b) week 25

135

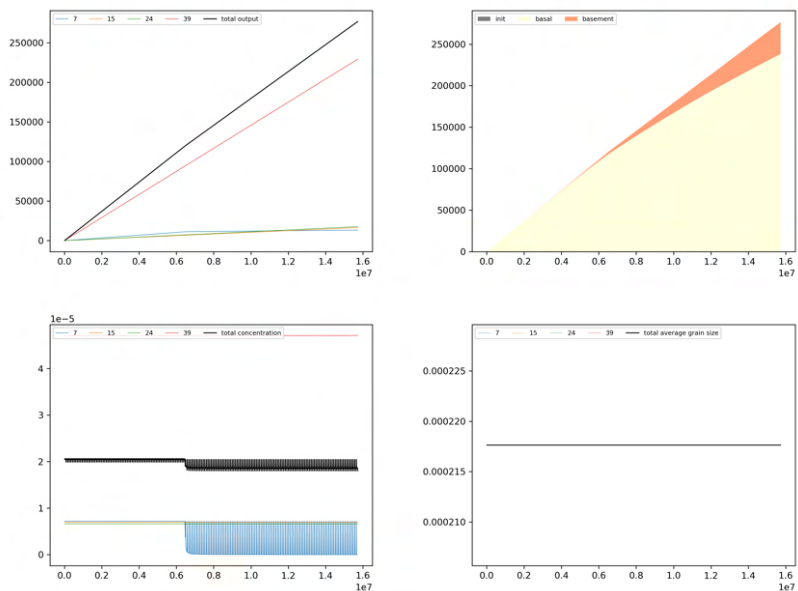

**Figure S53.** Outputs from the A8 reference model run with a) volume flux b) detritus volume flux c) concentration d) grainsize. In a, c and d numbers indicate outlet node IDs

## 2.1.17 A8 default

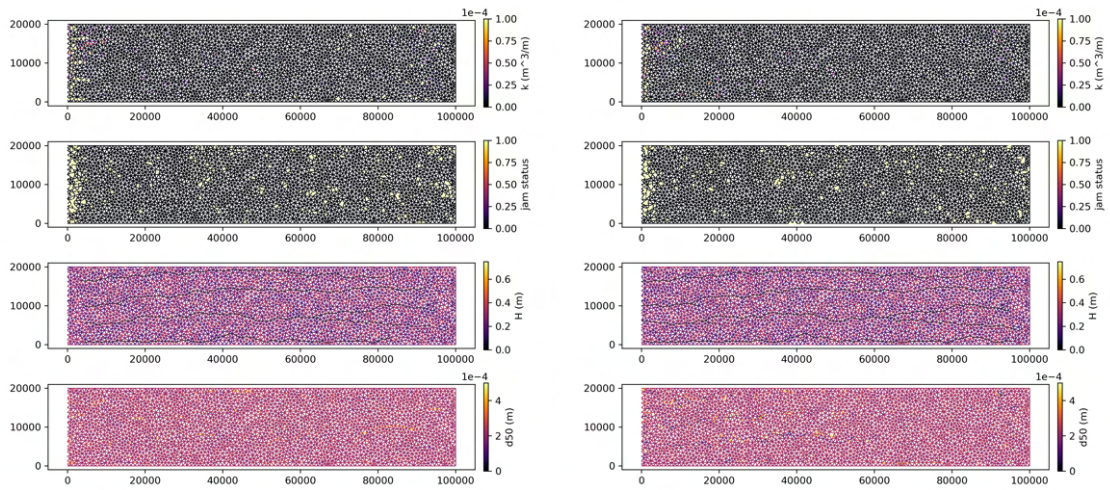

**Figure S54.** Results for the A8 default model run at a) week 0 and b) week 25

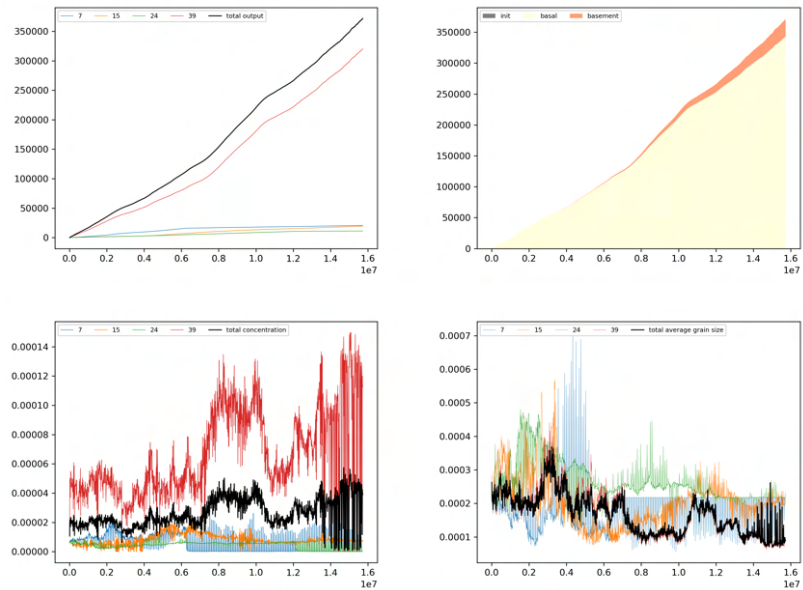

**Figure S55.** Outputs from the A8 default model run with a) volume flux b) detritus volume flux c) concentration d) grainsize. In a, c and d numbers indicate outlet node IDs

## 2.1.18 A8 default rerun

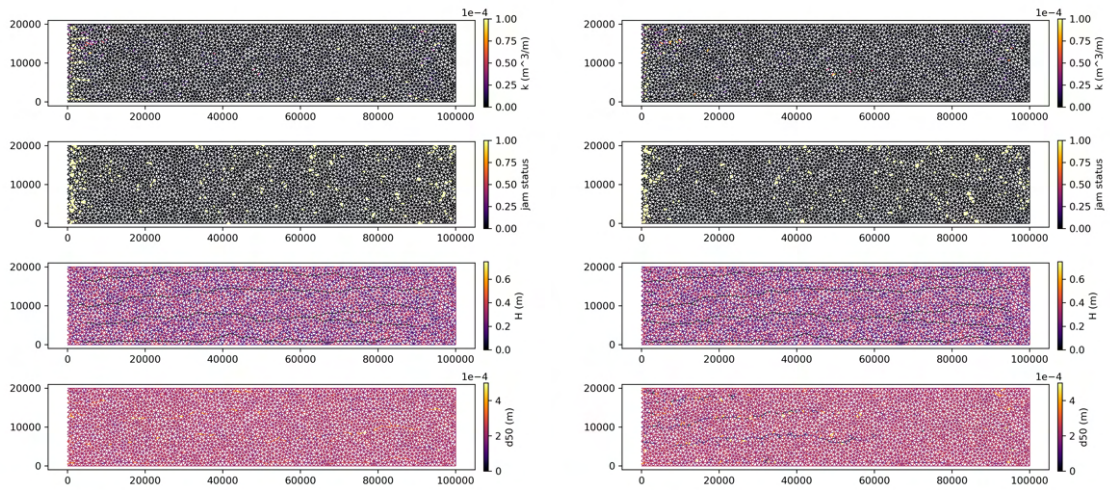

**Figure S56.** Results for the A8 default model rerun at a) week 0 and b) week 25

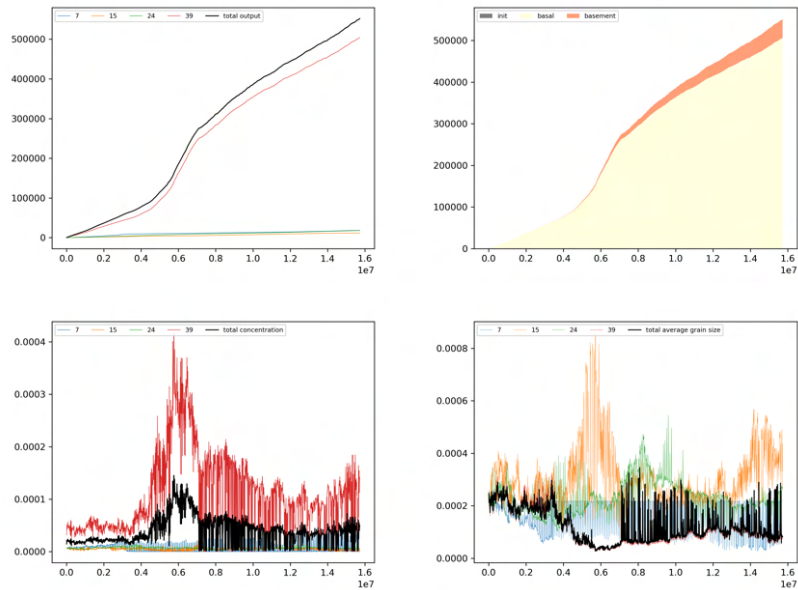

**Figure S57.** Outputs from the A8 default model rerun with a) volume flux b) detritus volume flux c) concentration d) grainsize. In a, c and d numbers indicate outlet node IDs

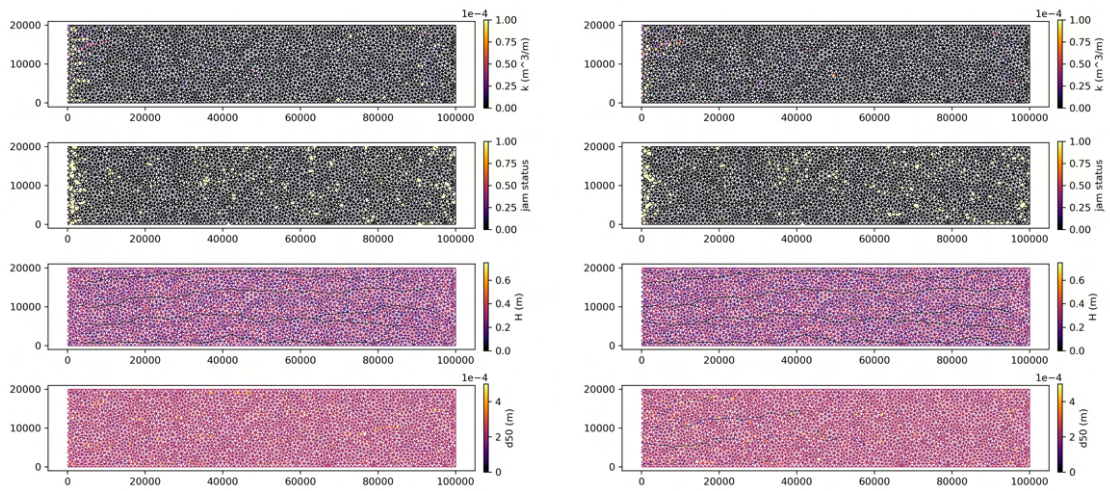

Figure S58. Results for the A8D default model run at a) week 0 and b) week 25

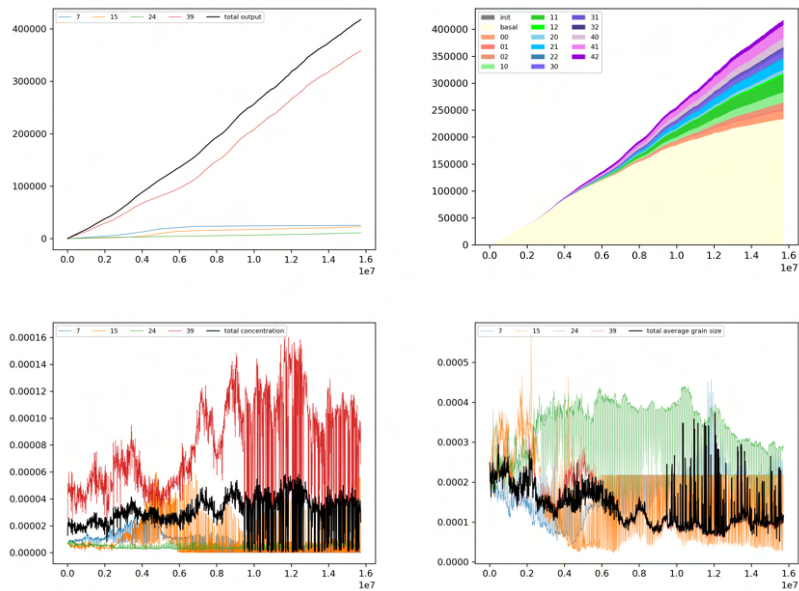

Figure S59. Outputs from the A8D default model run with a) volume flux b) detritus volume flux c) concentration d) grainsize. In a, c and d numbers indicate outlet node IDs



## 2.1.20 A8D default rerun

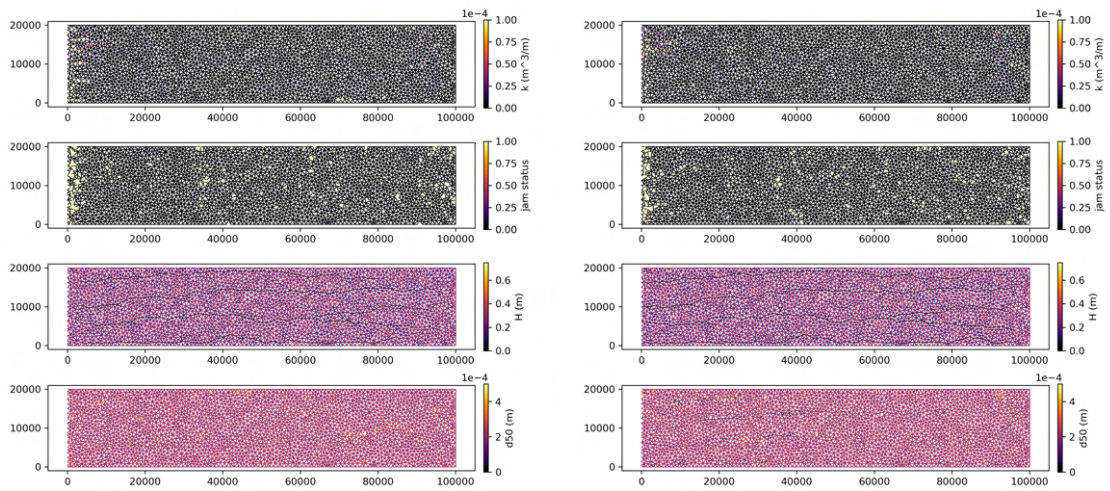

150

**Figure S60.** Results for the A8D default model rerun at a) week 0 and b) week 25

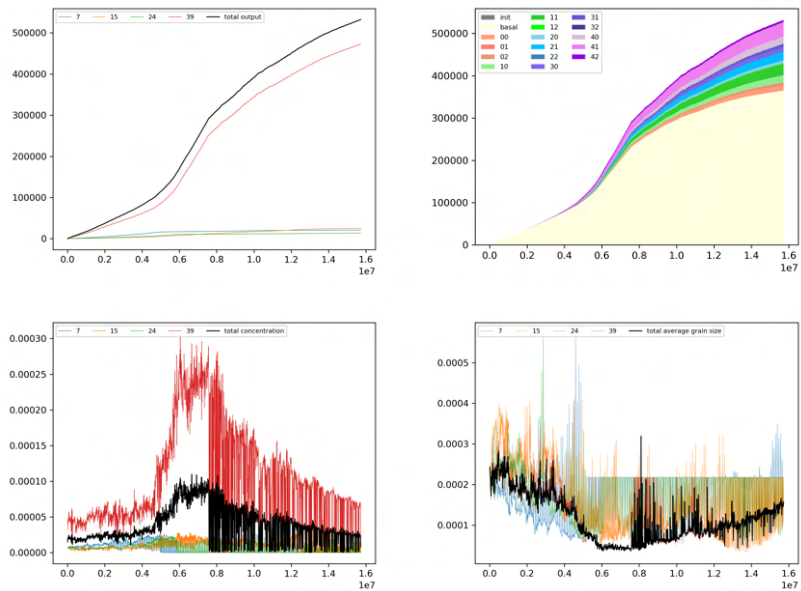

**Figure S61.** Outputs from the A8D default model rerun with a) volume flux b) detritus volume flux c) concentration d) grainsize. In a, c and d numbers indicate outlet node IDs

## 2.1.21 A6 reference

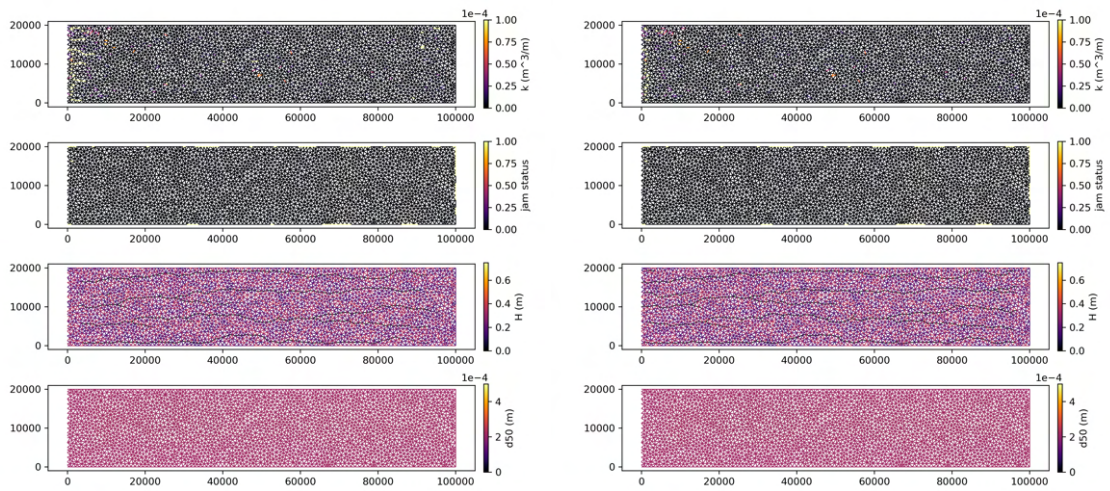

**Figure S62.** Results for the A6 reference model run at a) week 0 and b) week 25

155

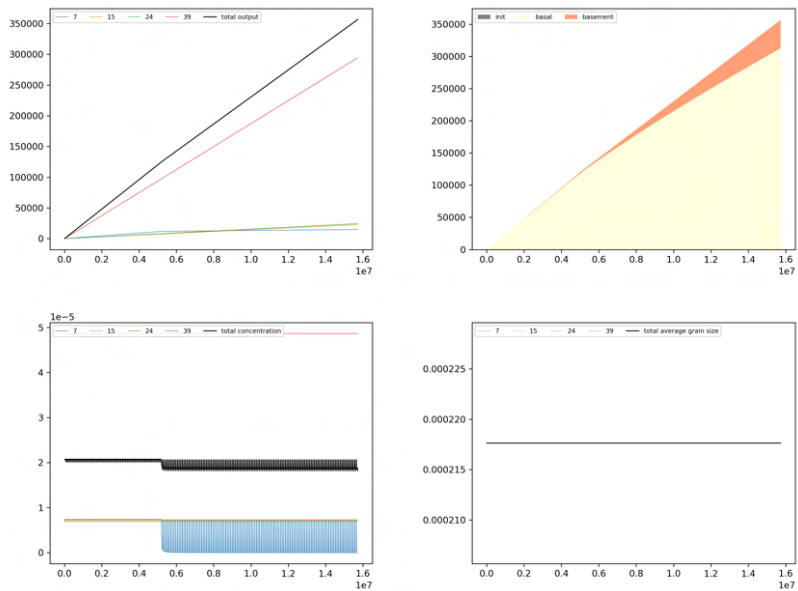

**Figure S63.** Outputs from the A6 reference model run with a) volume flux b) detritus volume flux c) concentration d) grainsize. In a, c and d numbers indicate outlet node IDs

## 2.1.22 A6 default

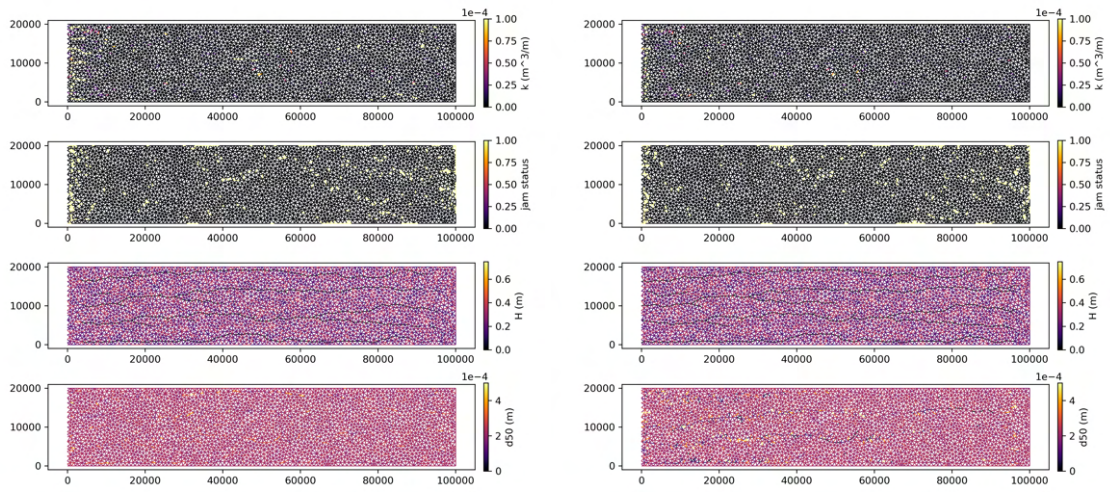

**Figure S64.** Results for the A6 default model run at a) week 0 and b) week 25

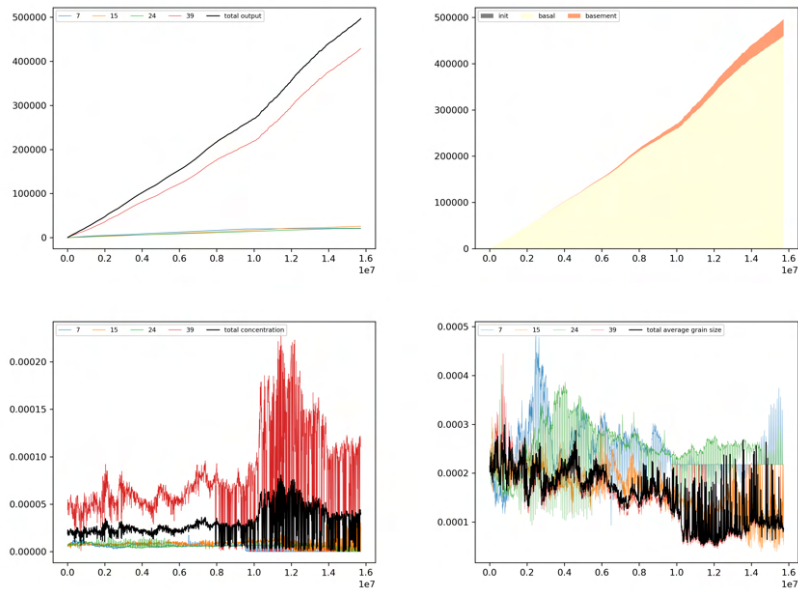

**Figure S65.** Outputs from the A6 default model run with a) volume flux b) detritus volume flux c) concentration d) grainsize. In a, c and d numbers indicate outlet node IDs

### 2.1.23 A6 default rerun

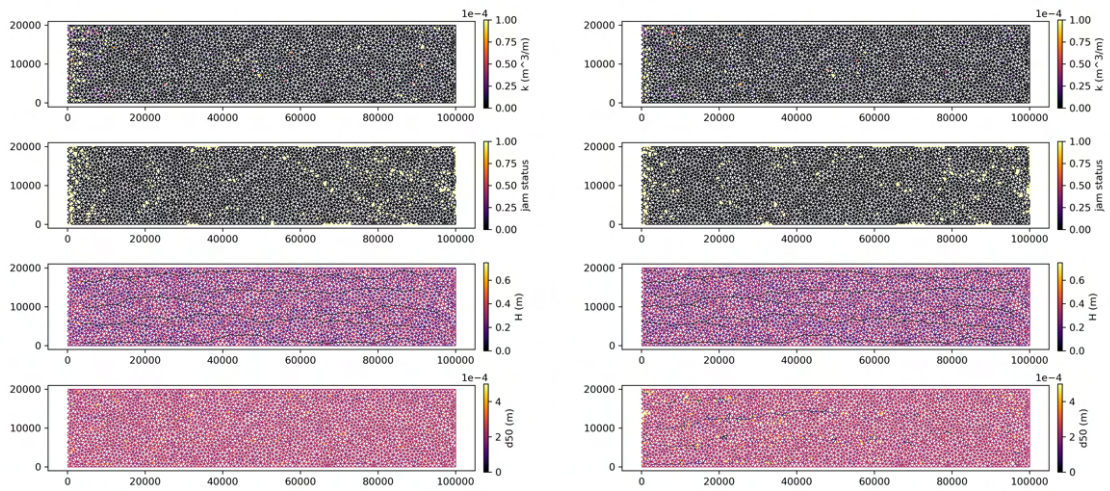

**Figure S66.** Results for the A6 default model rerun at a) week 0 and b) week 25

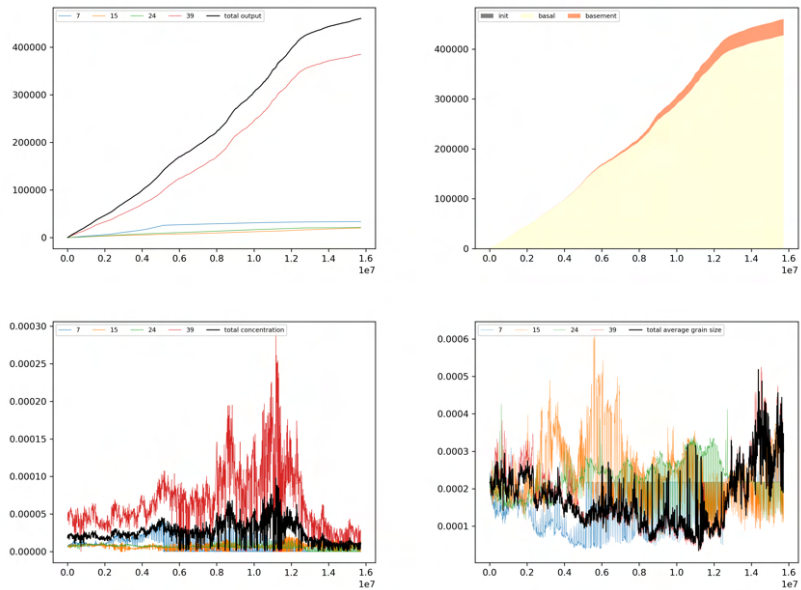

**Figure S67.** Outputs from the A6 default model rerun with a) volume flux b) detritus volume flux c) concentration d) grainsize. In a, c and d numbers indicate outlet node IDs

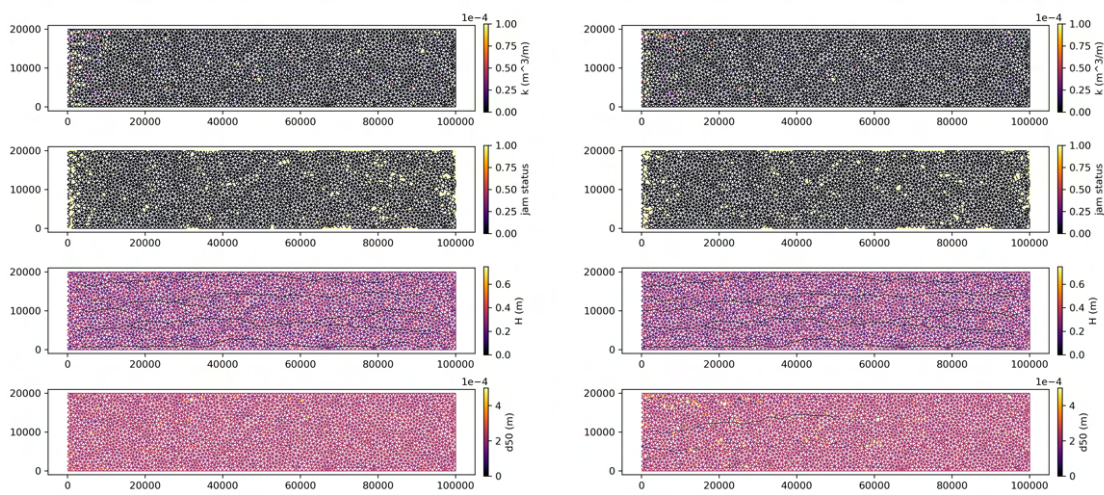

Figure S68. Results for the A6D default model run at a) week 0 and b) week 25

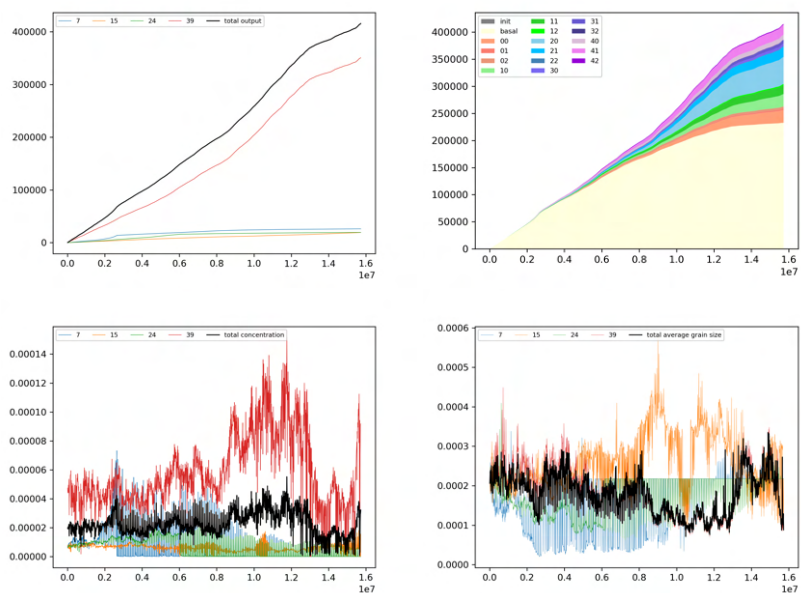

Figure S69. Outputs from the A6D default model run with a) volume flux b) detritus volume flux c) concentration d) grainsize. In a, c and d numbers indicate outlet node IDs

## 2.1.25 A6D default rerun

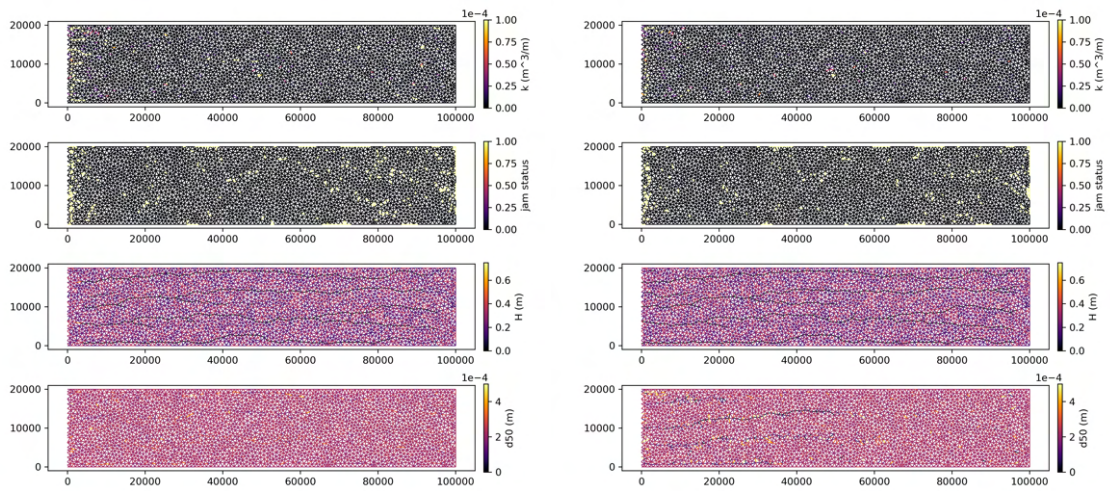

170

**Figure S70.** Results for the A6D default model rerun at a) week 0 and b) week 25

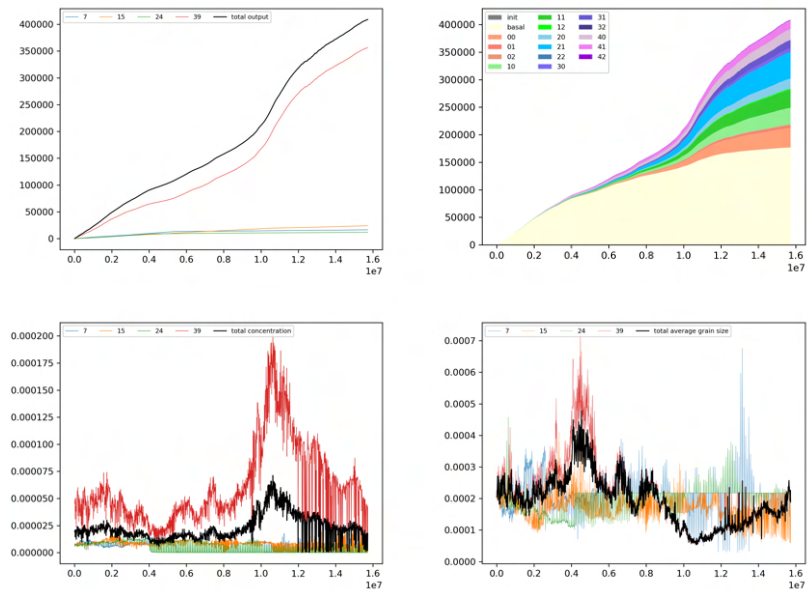

**Figure S71.** Outputs from the A6D default model rerun with a) volume flux b) detritus volume flux c) concentration d) grainsize. In a, c and d numbers indicate outlet node IDs

## 2.2 Experiment Set 2

### 2.2.1 $\phi = 3.2$

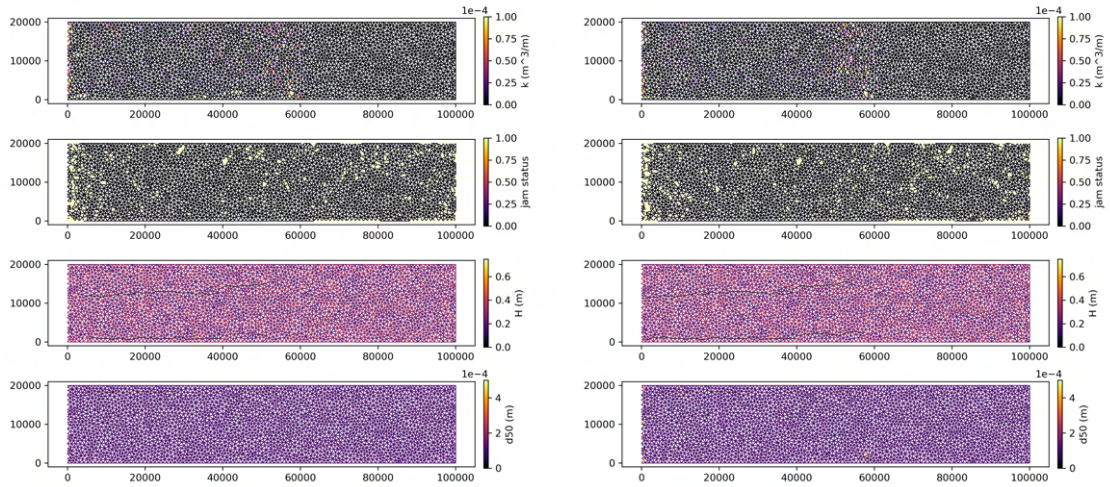

175

**Figure S72.** Results for the  $\phi = 3.2$  model run at a) week 0 and b) week 25

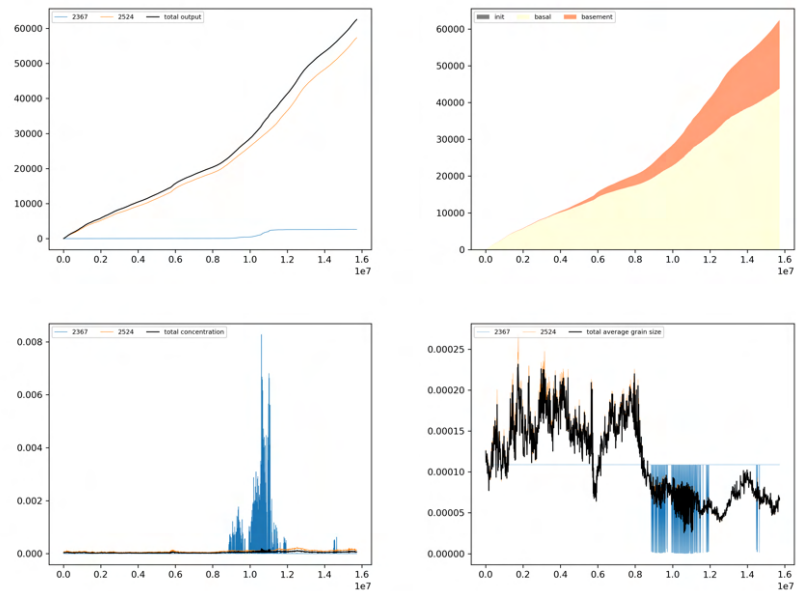

**Figure S73.** Outputs from the  $\phi = 3.2$  model run with a) volume flux b) detritus volume flux c) concentration d) grainsize. In a, c and d numbers indicate outlet node IDs

### 2.2.2 $\phi = 1.2$

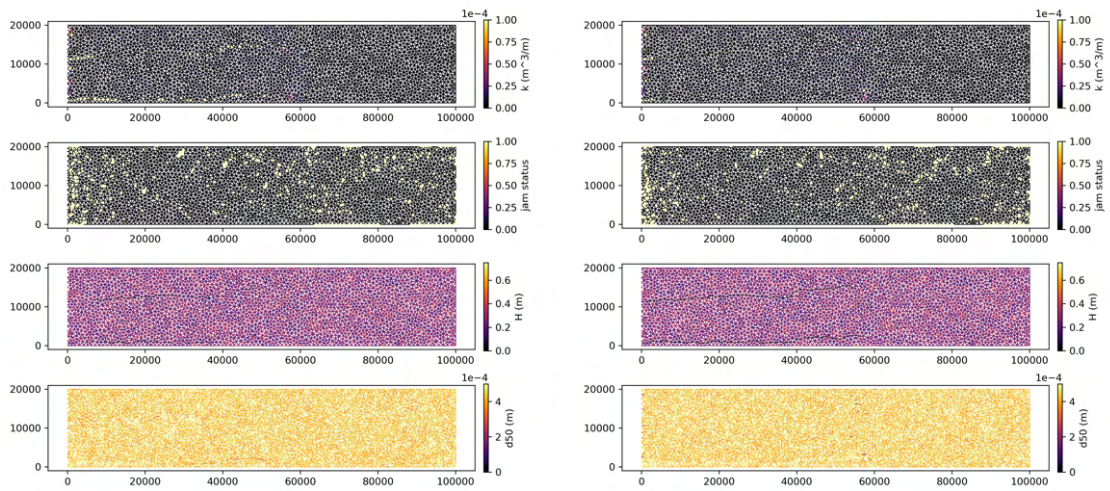

**Figure S74.** Results for the  $\phi = 1.2$  model run at a) week 0 and b) week 25

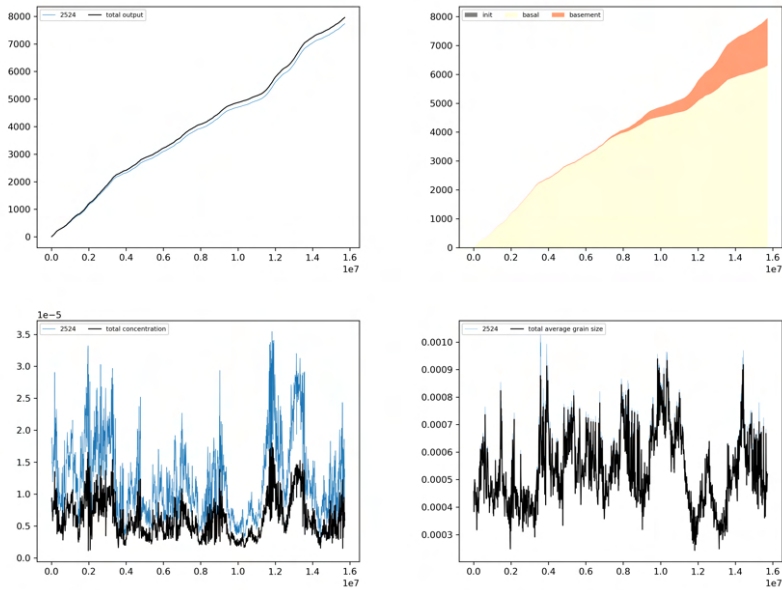

**Figure S75.** Outputs from the  $\phi = 1.2$  model run with a) volume flux b) detritus volume flux c) concentration d) grainsize. In a, c and d numbers indicate outlet node IDs



### 2.2.3 $\zeta = 1$

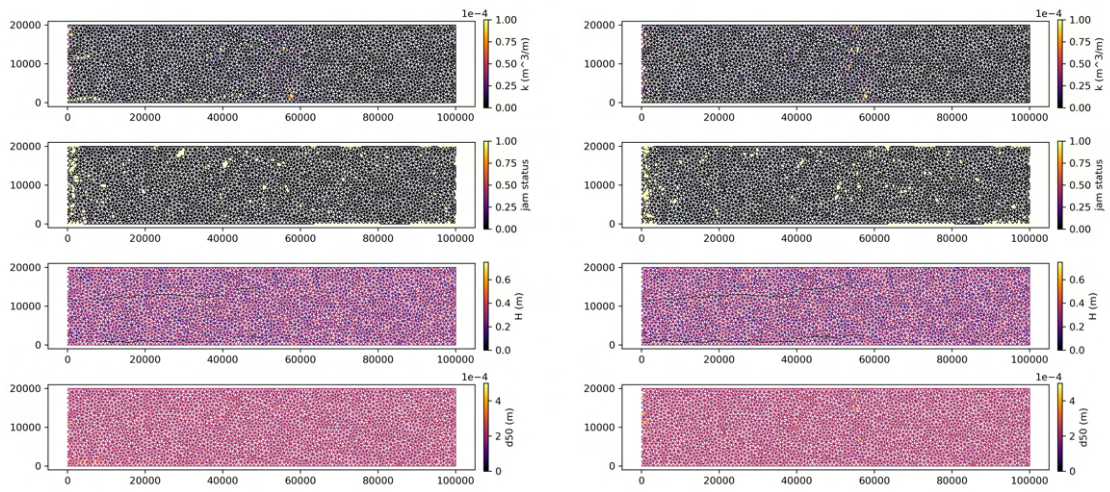

**Figure S76.** Results for the  $\zeta = 1$  model run at a) week 0 and b) week 25

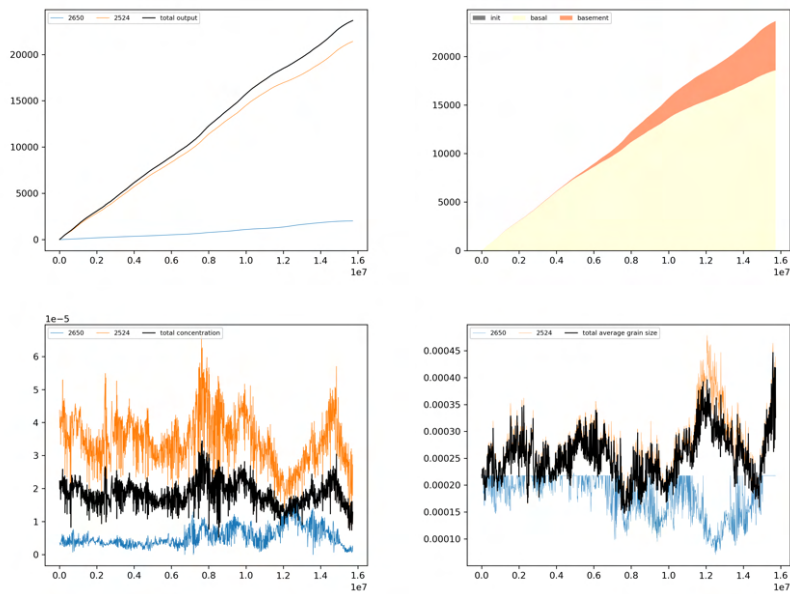

185

**Figure S77.** Outputs from the  $\zeta = 1$  model run with a) volume flux b) detritus volume flux c) concentration d) grainsize. In a, c and d numbers indicate outlet node IDs

## 2.2.4 $\zeta = 2$

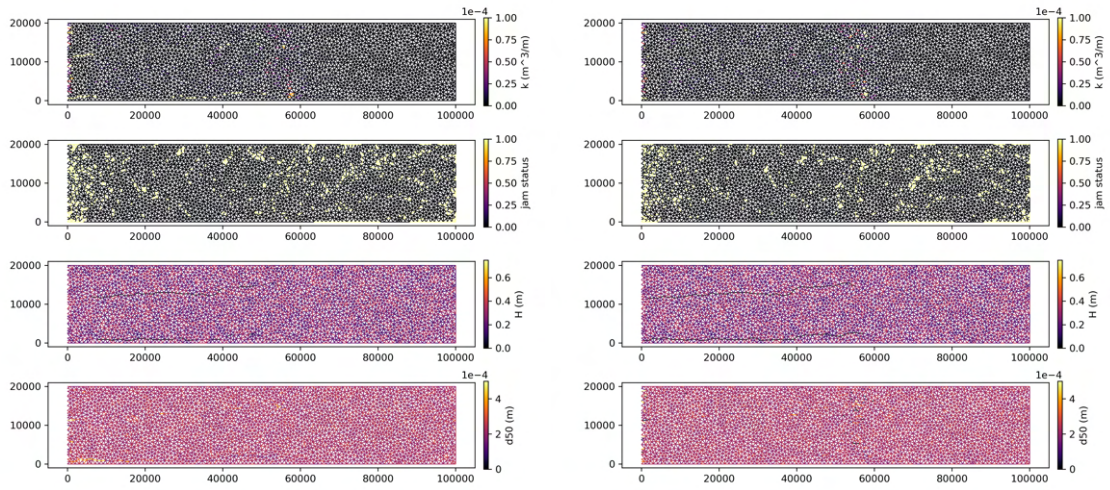

**Figure S78.** Results for the  $\zeta = 2$  model run at a) week 0 and b) week 25

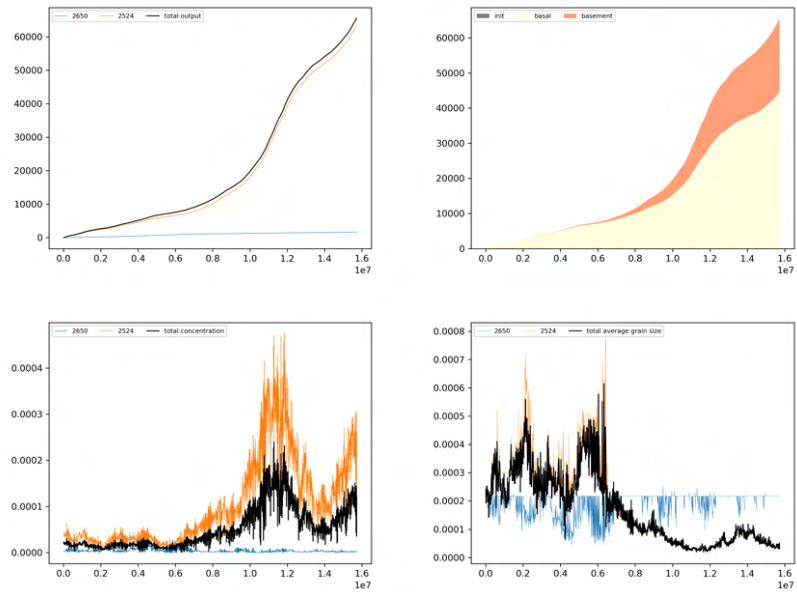

**Figure S79.** Outputs from the  $\zeta = 2$  model run with a) volume flux b) detritus volume flux c) concentration d) grainsize. In a, c and d numbers indicate outlet node IDs

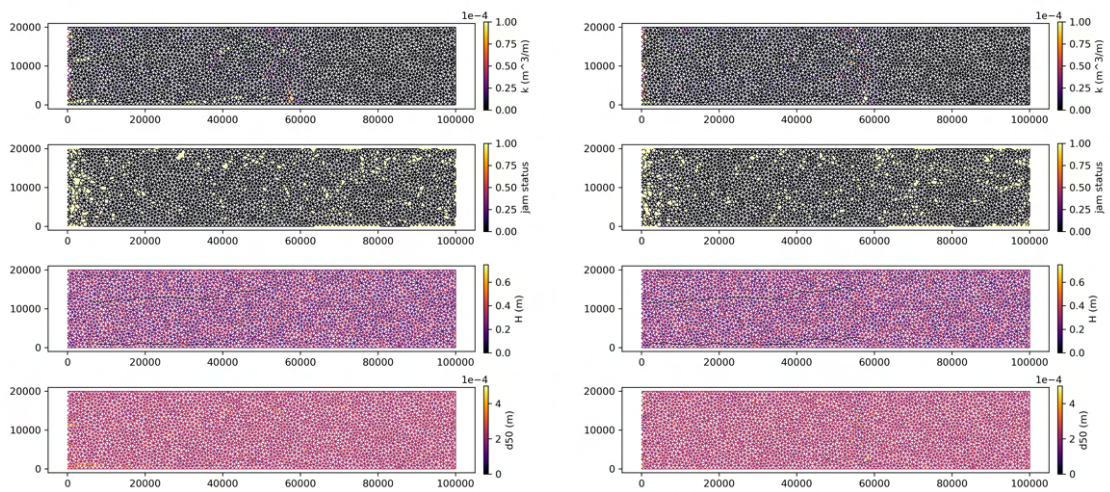

**Figure S80.** Results for the low grain density model run at a) week 0 and b) week 25

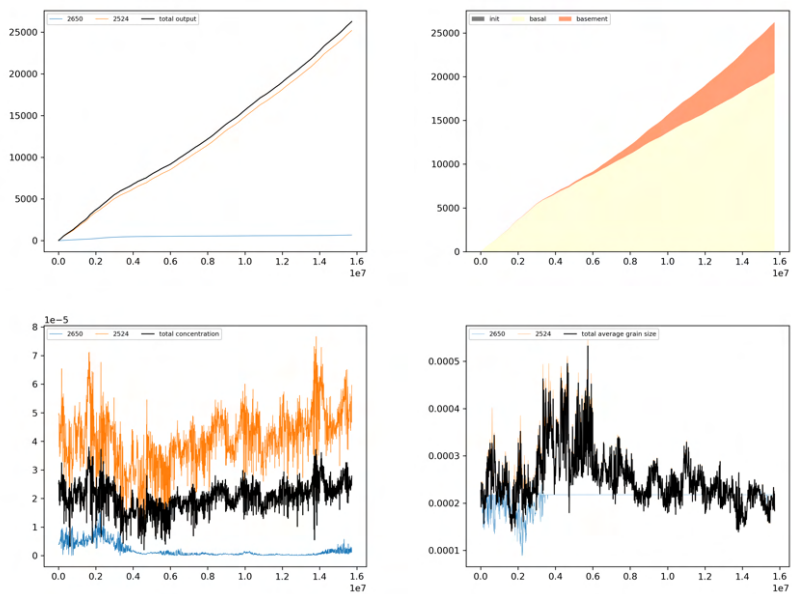

**Figure S81.** Outputs from the low grain density model run with a) volume flux b) detritus volume flux c) concentration d) grain size. In a, c and d numbers indicate outlet node IDs

## 2.2.6 $\rho_s = 2750$

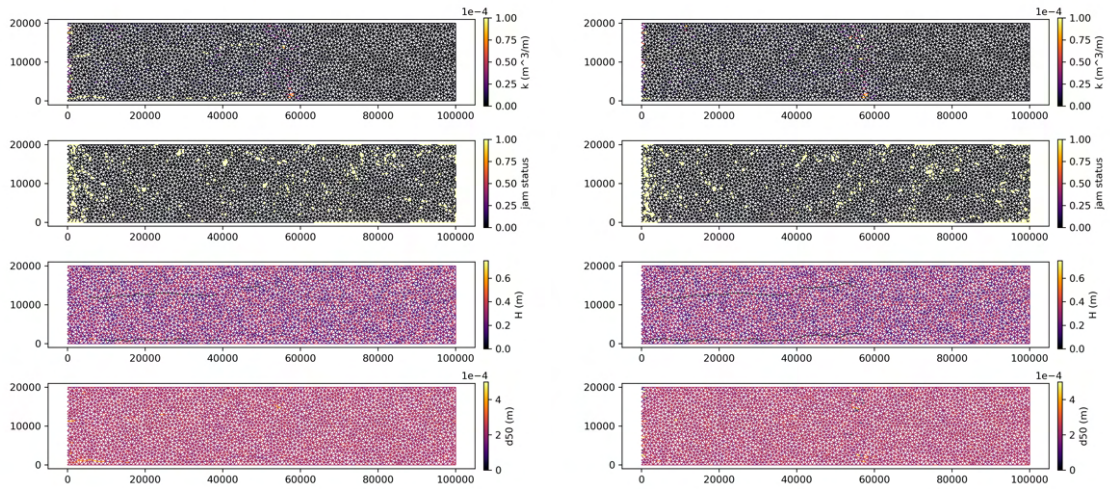

195

**Figure S82.** Results for the high grain density model run at a) week 0 and b) week 25

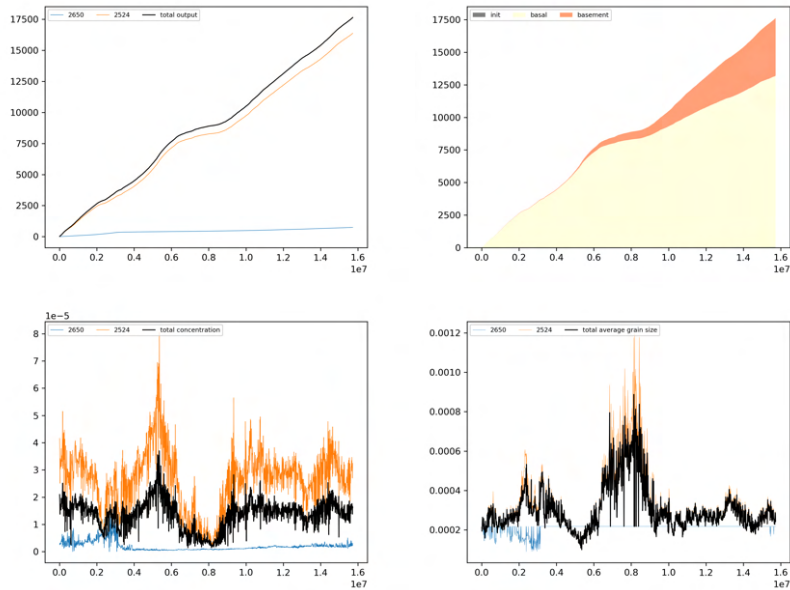

**Figure S83.** Outputs from the high grain density model run with a) volume flux b) detritus volume flux c) concentration d) grain size. In a, c and d numbers indicate outlet node IDs

### 2.2.7 $h_s = 0.05$

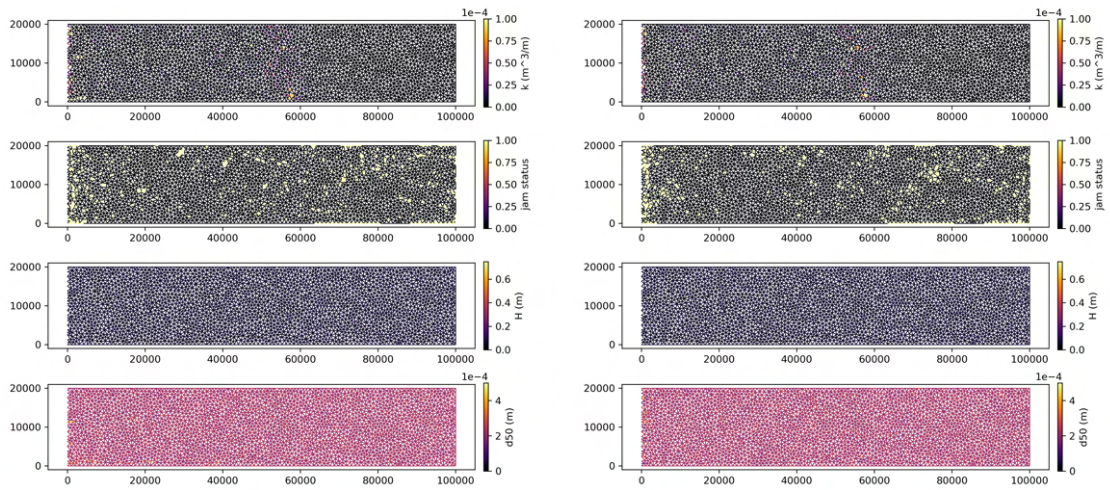

**Figure S84.** Results for the low sediment thickness model run at a) week 0 and b) week 25

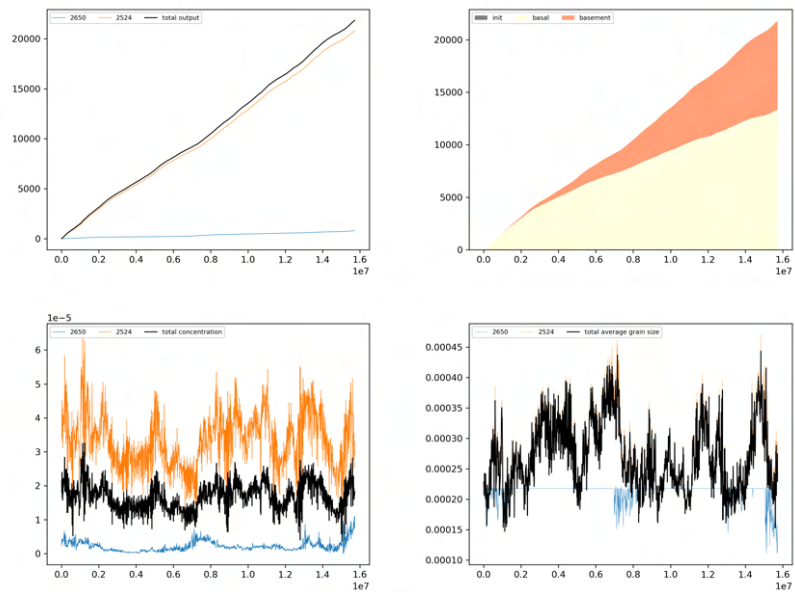

**Figure S85.** Outputs from the low sediment thickness model run with a) volume flux b) detritus volume flux c) concentration d) grain size. In a, c and d numbers indicate outlet node IDs

## 2.2.8 $h_s = 0.5$

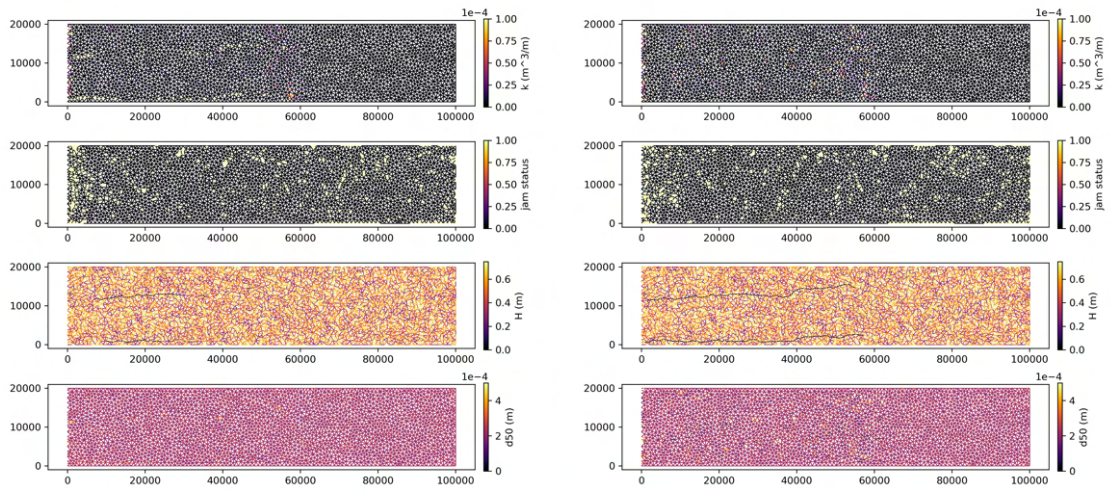

**Figure S86.** Results for the high sediment thickness model run at a) week 0 and b) week 25

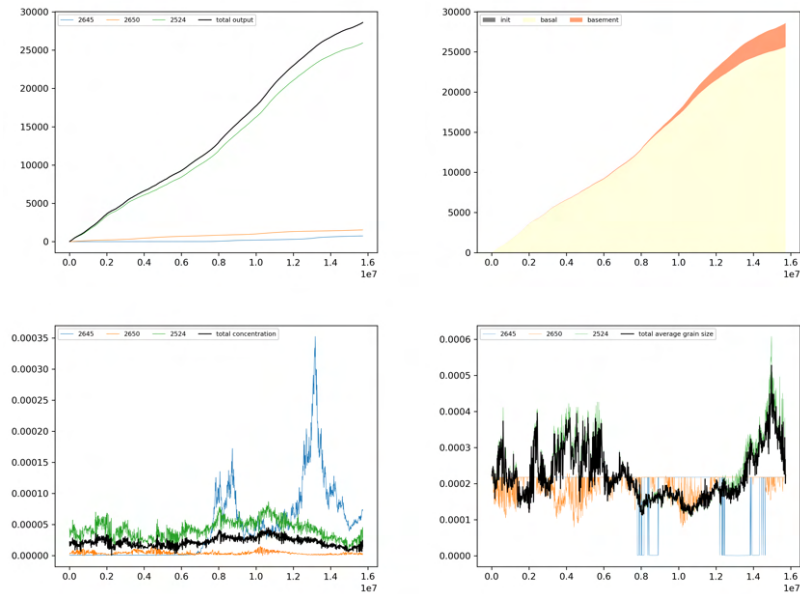

205

**Figure S87.** Outputs from the high sediment thickness model run with a) volume flux b) detritus volume flux c) concentration d) grainsize. In a, c and d numbers indicate outlet node IDs

## 2.2.9 $\Delta\sigma = 0.005$

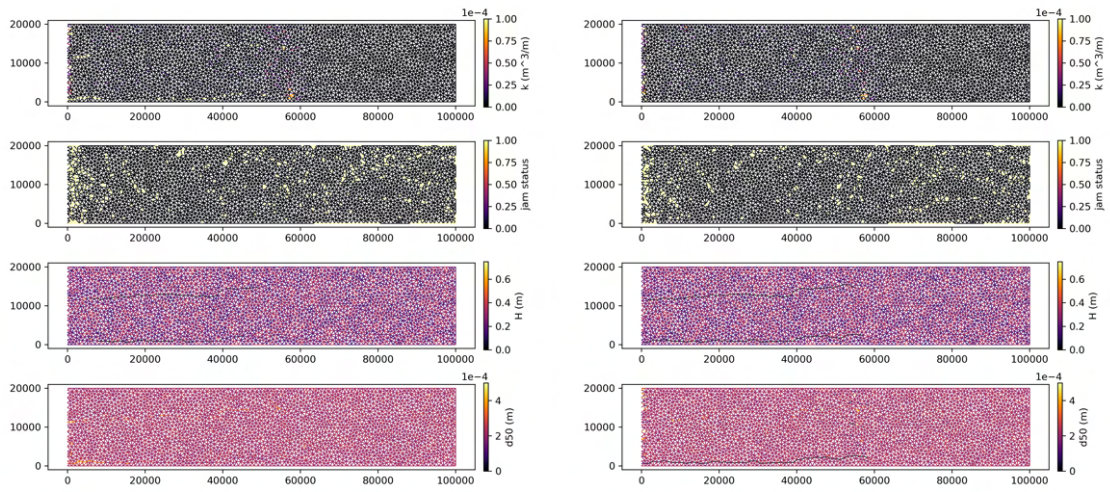

**Figure S88.** Results for the  $\Delta\sigma = 0.005$  model run at a) week 0 and b) week 25

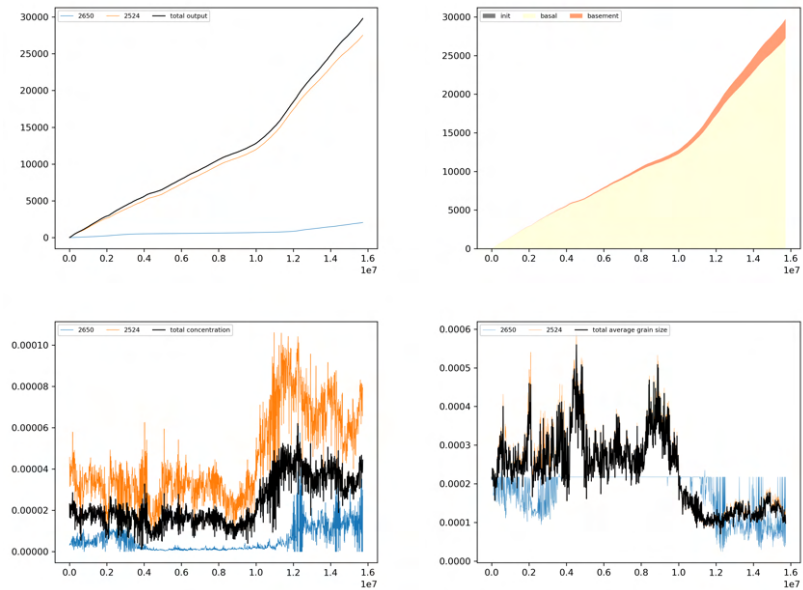

**Figure S89.** Outputs from the  $\Delta\sigma = 0.005$  model run with a) volume flux b) detritus volume flux c) concentration d) grainsize. In a, c and d numbers indicate outlet node IDs

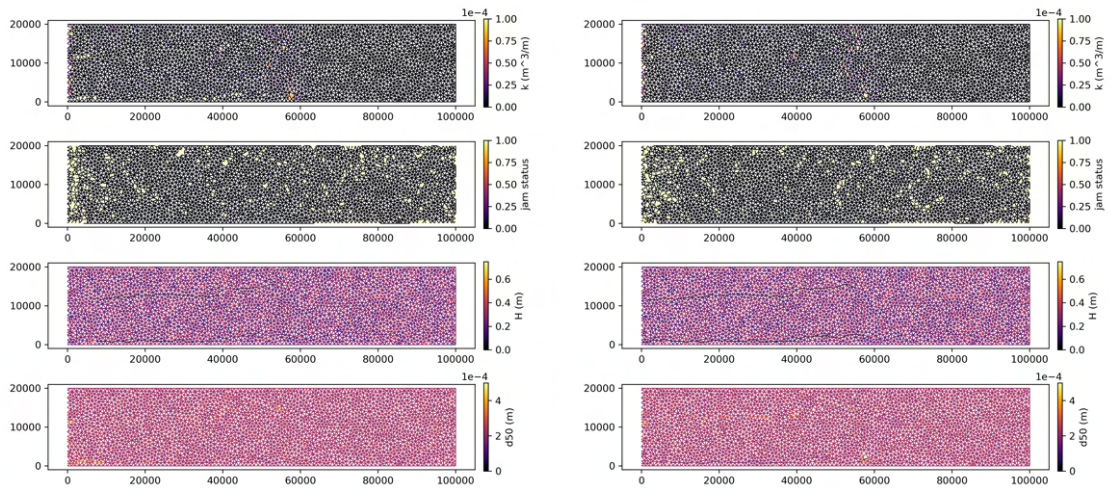

**Figure S90.** Results for the  $\Delta\sigma = 100$  model run at a) week 0 and b) week 25

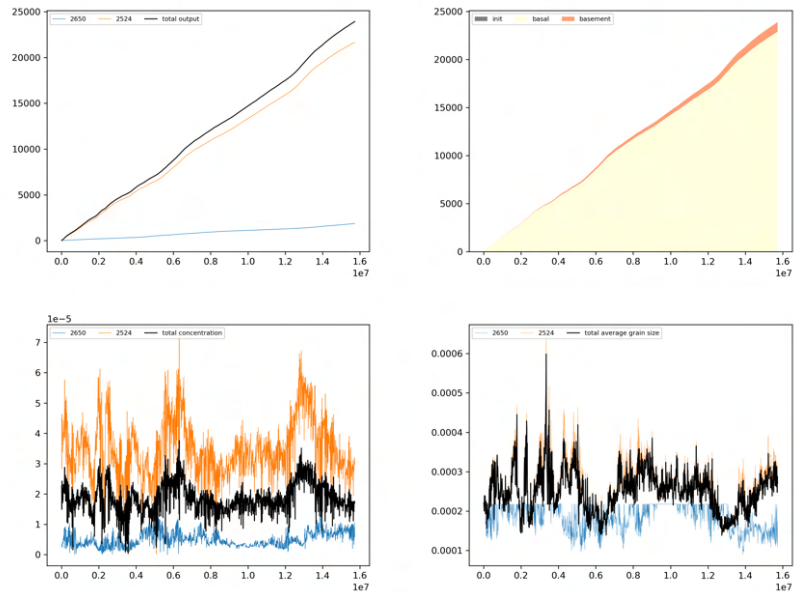

**Figure S91.** Outputs from the  $\Delta\sigma = 0.01$  model run with a) volume flux b) detritus volume flux c) concentration d) grainsize. In a, c and d numbers indicate outlet node IDs



## 2.2.11 Erosion scaling $\dot{\epsilon} = 1e^{-7}u_b^{2.02}$

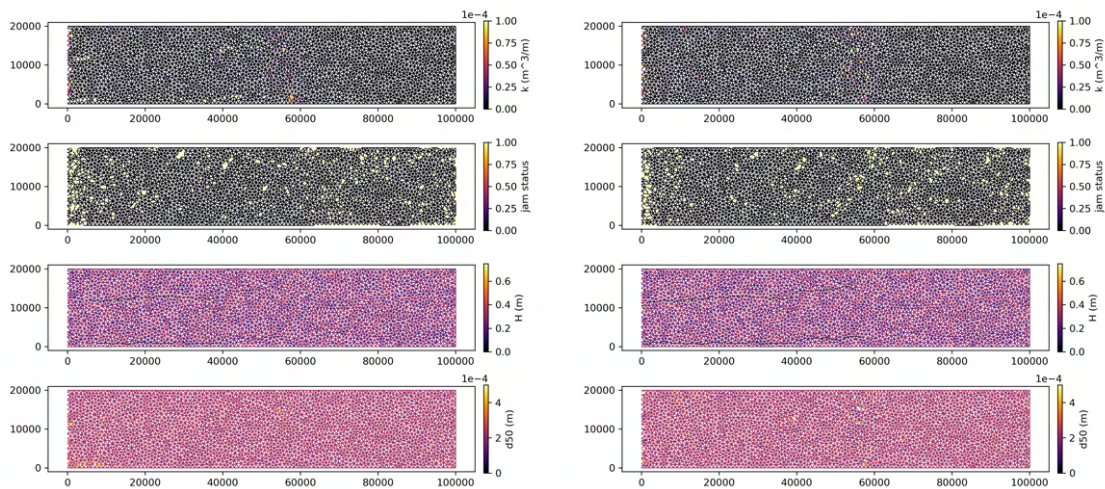

215

**Figure S92.** Results for the  $\dot{\epsilon} = 1e^{-7}u_b^{2.02}$  model run at a) week 0 and b) week 25

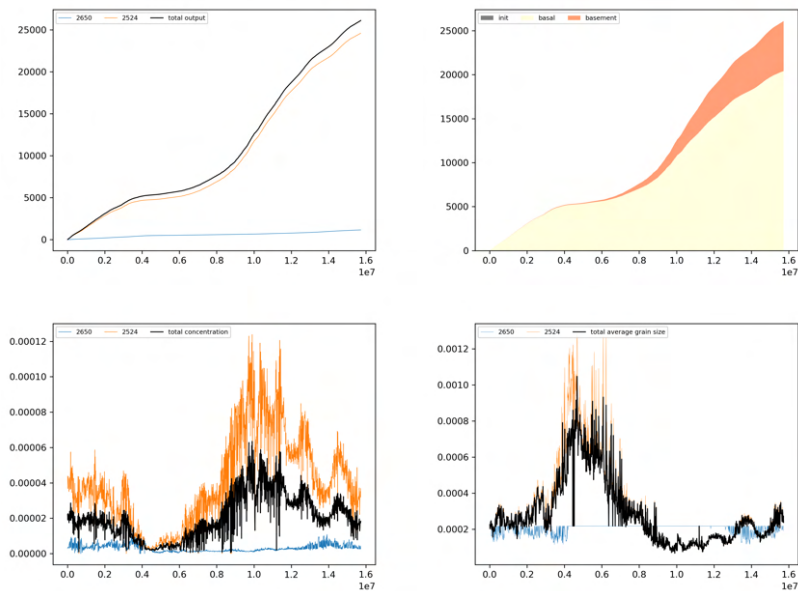

**Figure S93.** Outputs from the  $\dot{\epsilon} = 1e^{-7}u_b^{2.02}$  model run with a) volume flux b) detritus volume flux c) concentration d) grainsize. In a, c and d numbers indicate outlet node IDs

## 2.2.12 Erosion scaling $\dot{\epsilon} = 1e^{-4}u_b$

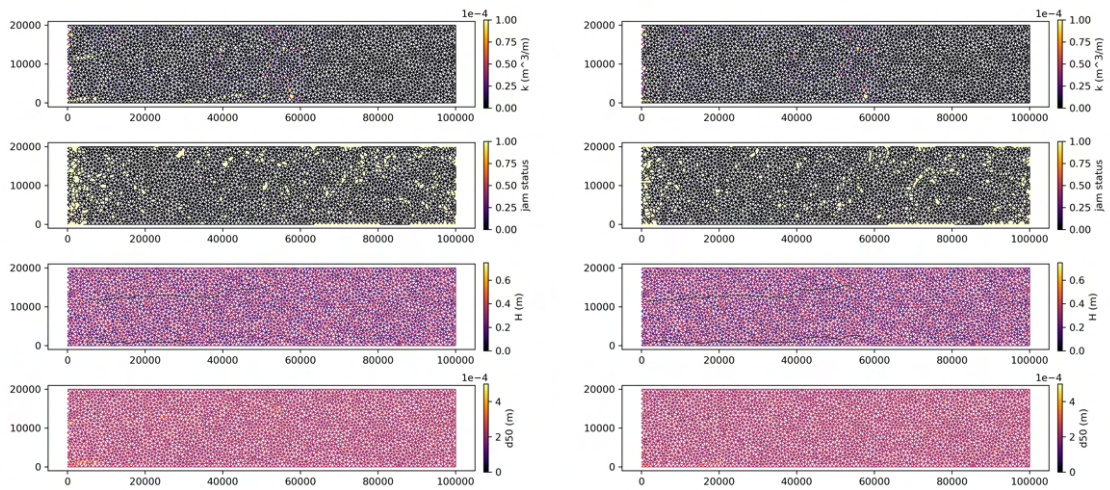

**Figure S94.** Results for the  $\dot{\epsilon} = 1e^{-4}u_b$  model run at a) week 0 and b) week 25

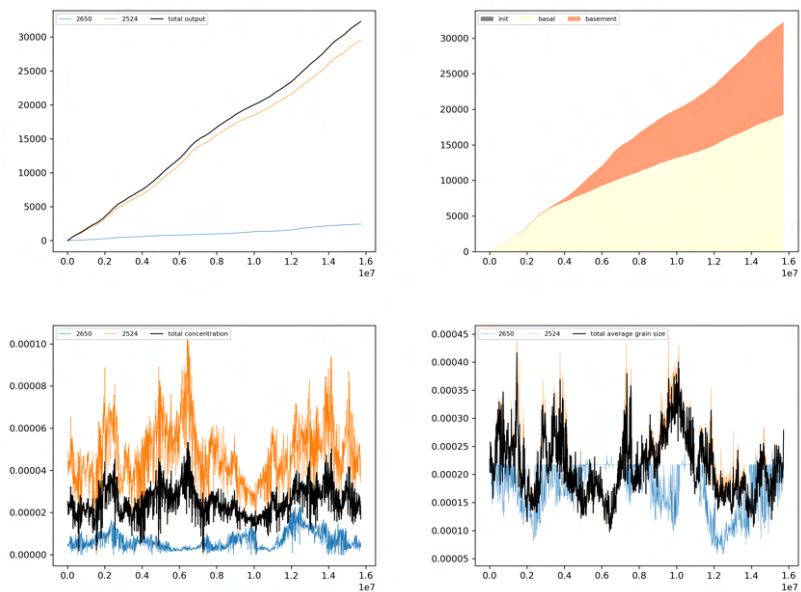

**Figure S95.** Outputs from the  $\dot{\epsilon} = 1e^{-4}u_b$  model run with a) volume flux b) detritus volume flux c) concentration d) grainsize. In a, c and d numbers indicate outlet node IDs

### 2.2.13 Erosion scaling $\dot{\epsilon} = 2e^{-4}u_b$

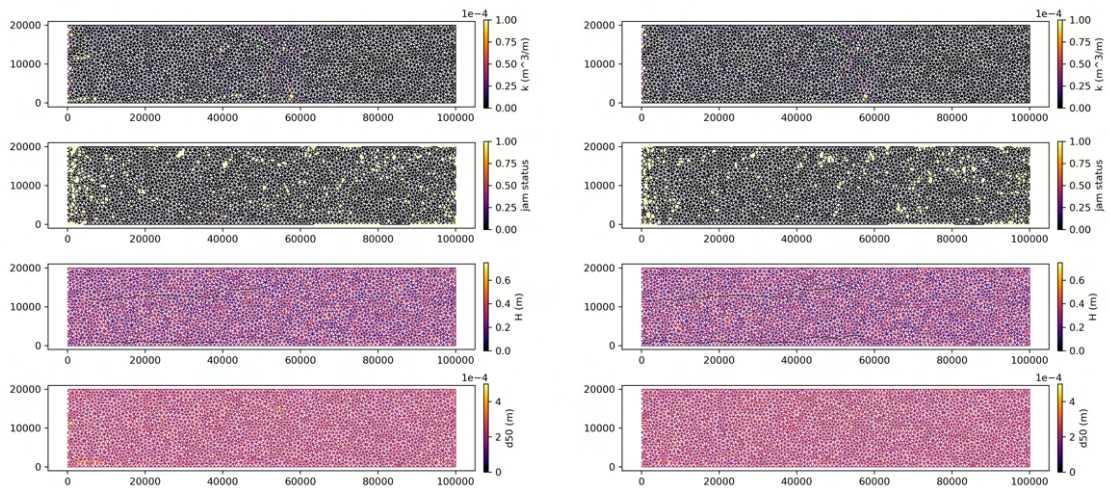

**Figure S96.** Results for the  $\dot{\epsilon} = 2e^{-4}u_b$  model run at a) week 0 and b) week 25

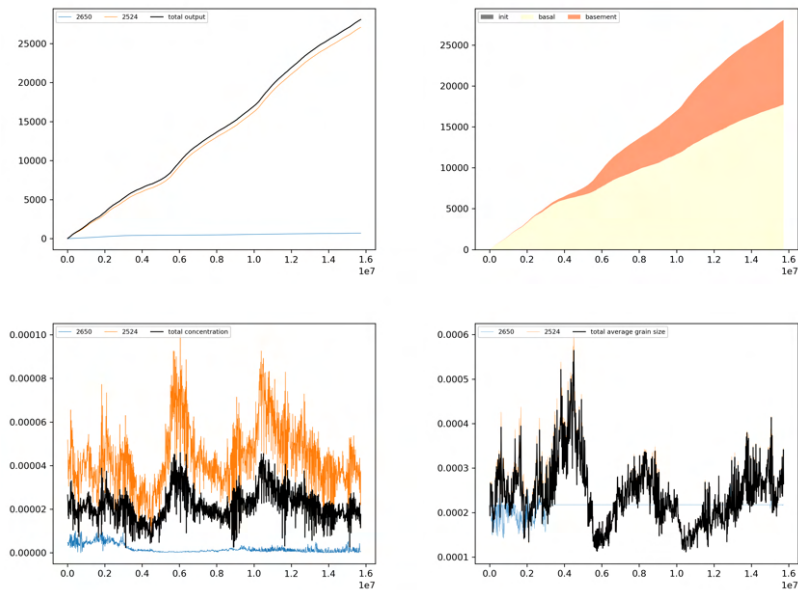

225

**Figure S97.** Outputs from the  $\dot{\epsilon} = 2e^{-4}u_b$  model run with a) volume flux b) detritus volume flux c) concentration d) grainsize. In a, c and d numbers indicate outlet node IDs

## 2.3 Experiment Set 3

### 2.3.1 B1 reference

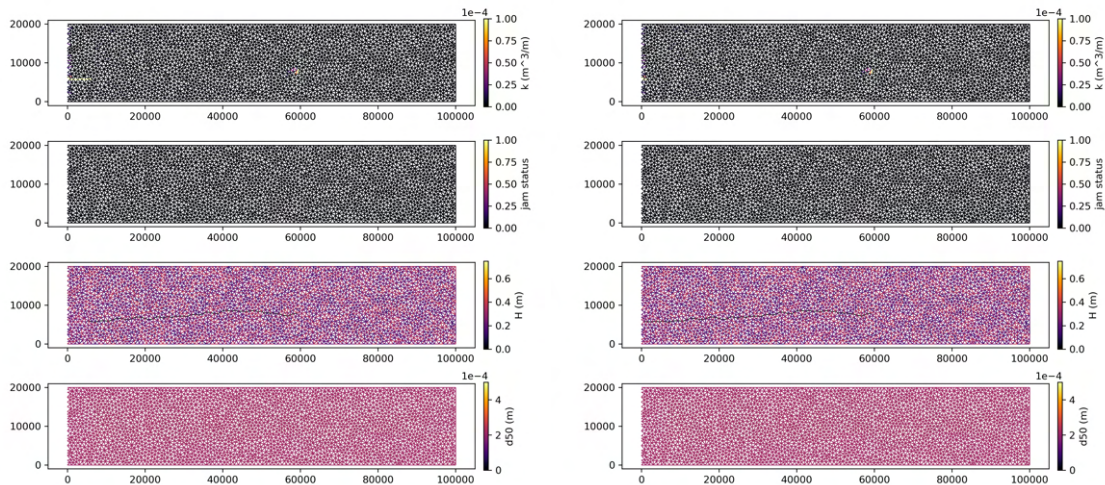

**Figure S98.** Results for the B1 reference model run at a) week 0 and b) week 25

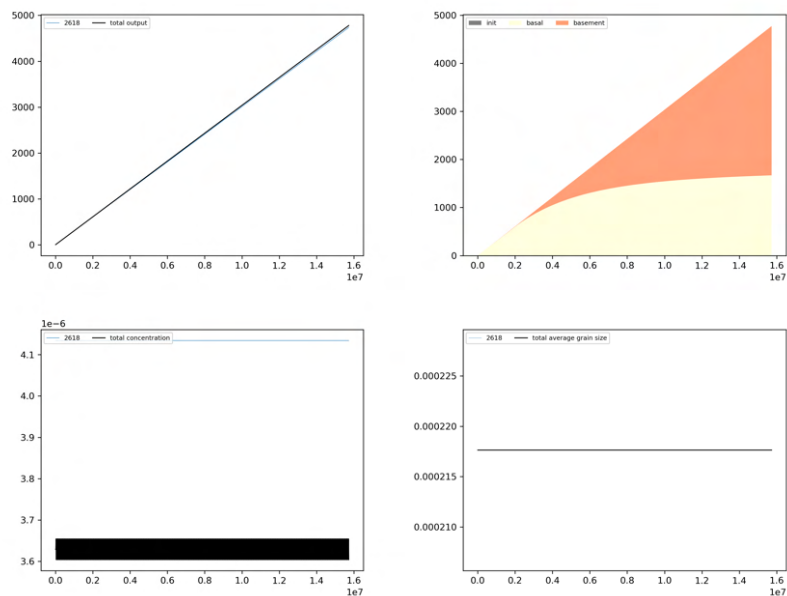

230

**Figure S99.** Outputs from the B1 reference model run with a) volume flux b) detritus volume flux c) concentration d) grainsize. In a, c and d numbers indicate outlet node IDs

### 2.3.2 B1 default

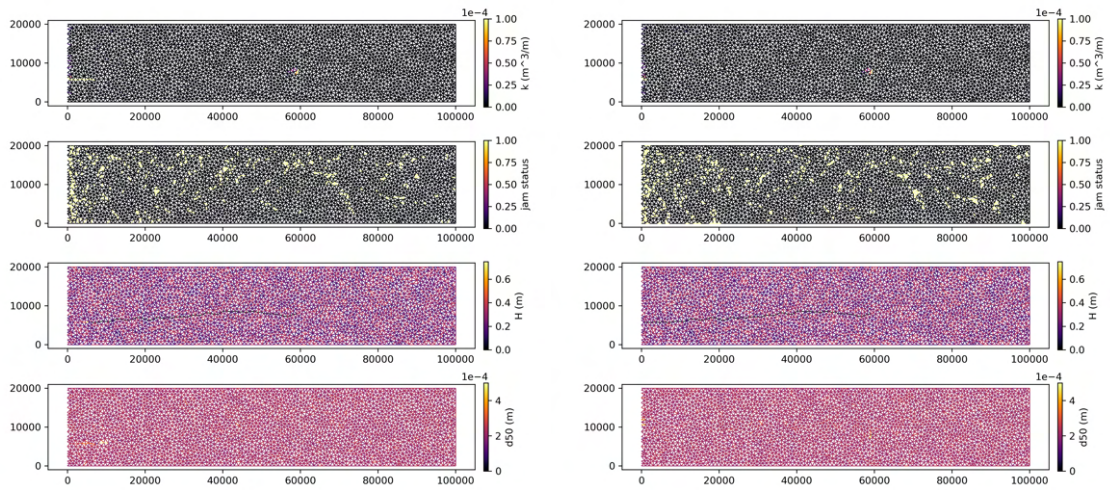

**Figure S100.** Results for the B1 default model run at a) week 0 and b) week 25

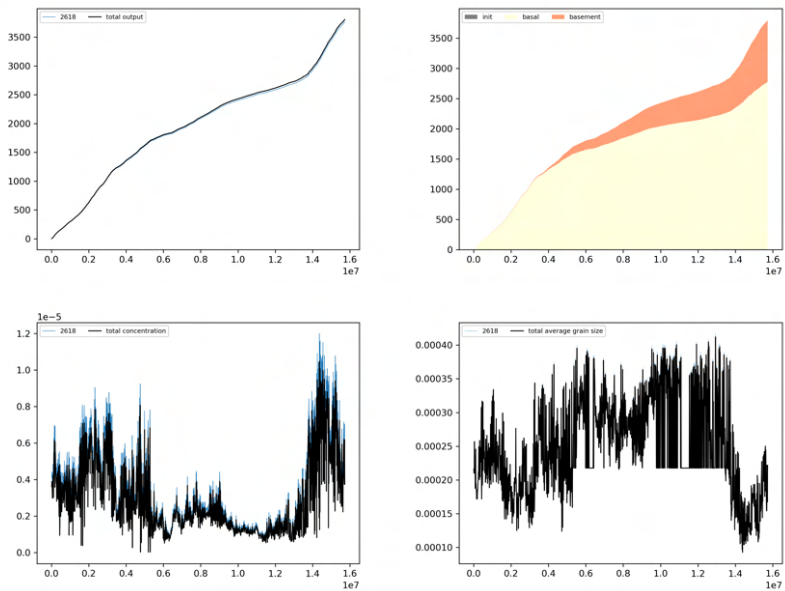

**Figure S101.** Outputs from the B1 default model run with a) volume flux b) detritus volume flux c) concentration d) grainsize. In a, c and d numbers indicate outlet node IDs

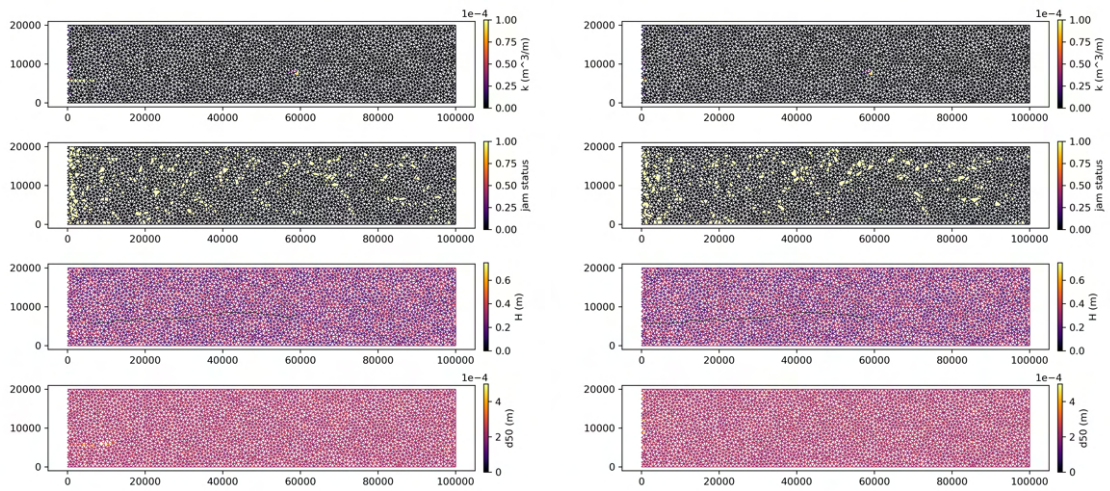

Figure S102. Results for the B1 default model rerun at a) week 0 and b) week 25

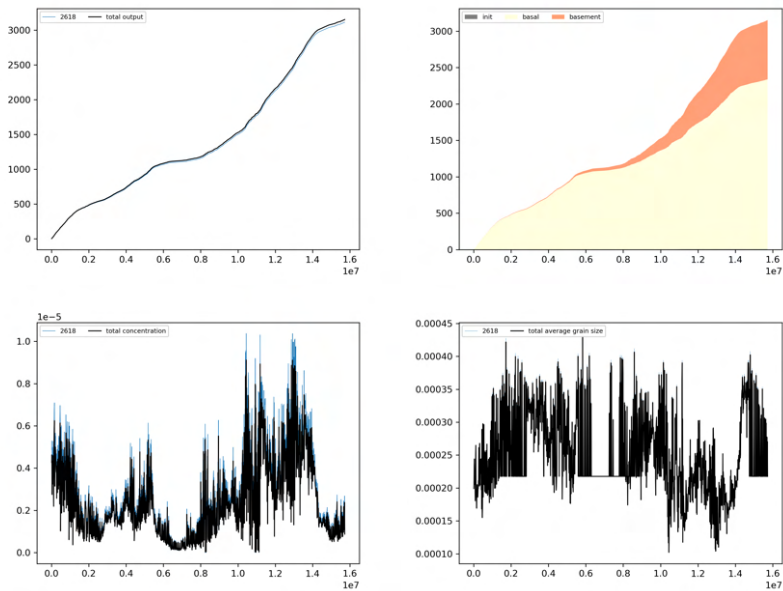

Figure S103. Outputs from the B1 default model rerun with a) volume flux b) detritus volume flux c) concentration d) grainsize. In a, c and d numbers indicate outlet node IDs

### 2.3.4 B1D default

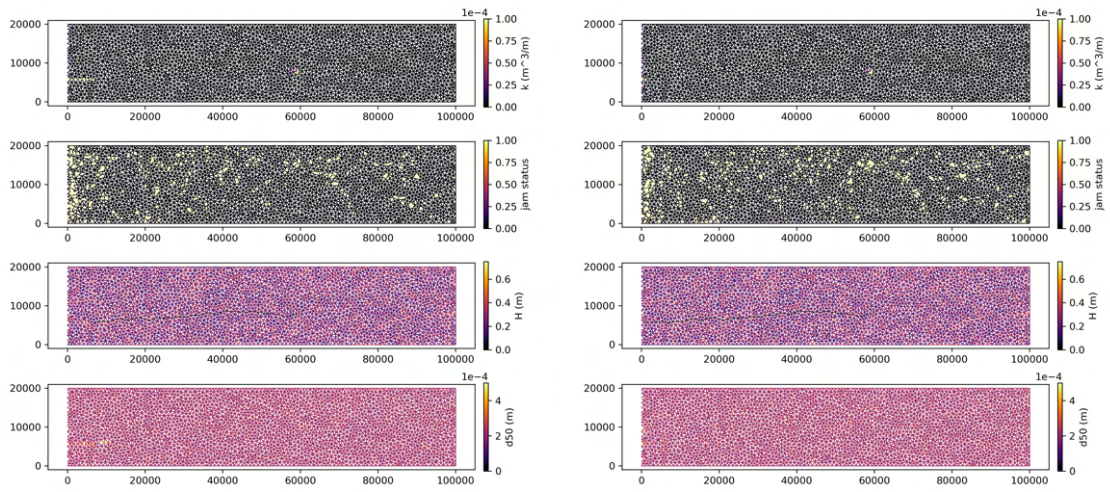

240

**Figure S104.** Results for the B1D default model run at a) week 0 and b) week 25

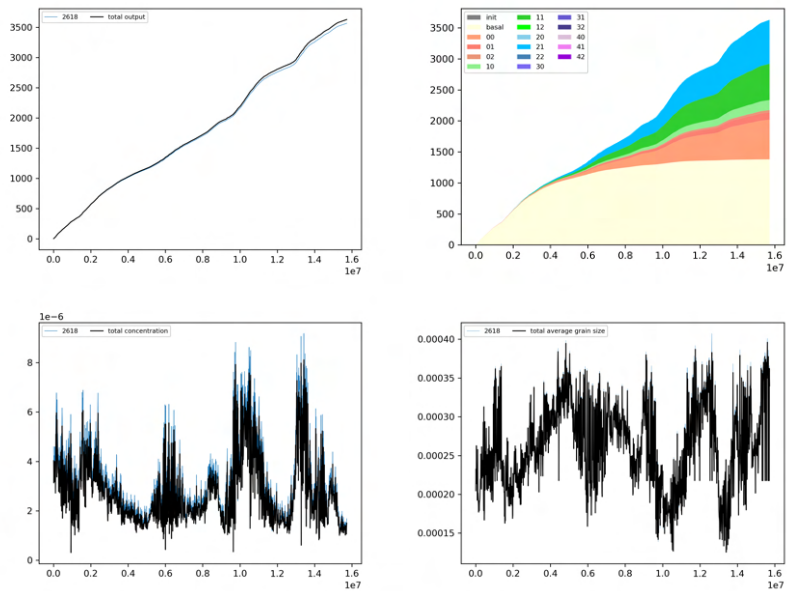

**Figure S105.** Outputs from the B1D default model run with a) volume flux b) detritus volume flux c) concentration d) grainsize. In a, c and d numbers indicate outlet node IDs

### 2.3.5 B2 reference

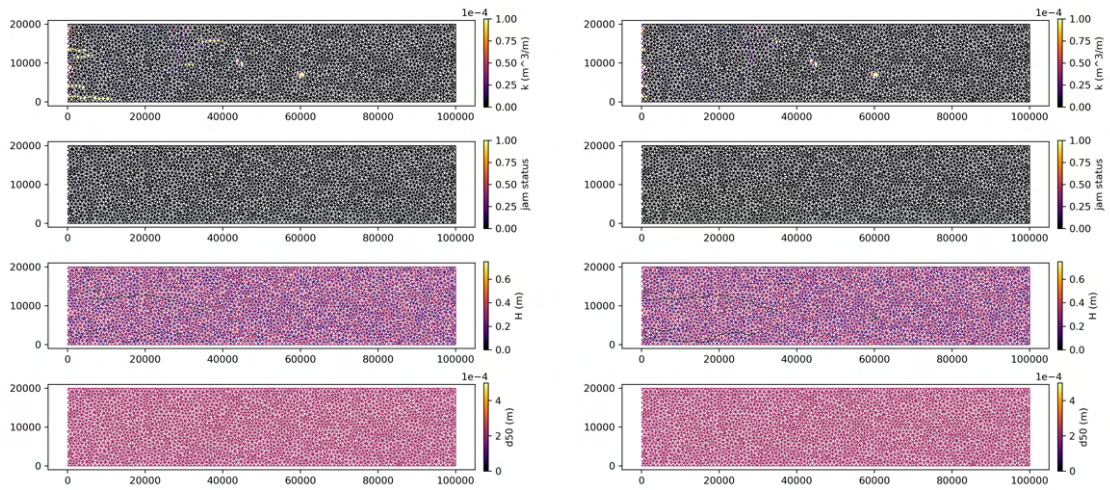

**Figure S106.** Results for the B2 reference model run at a) week 0 and b) week 25

245

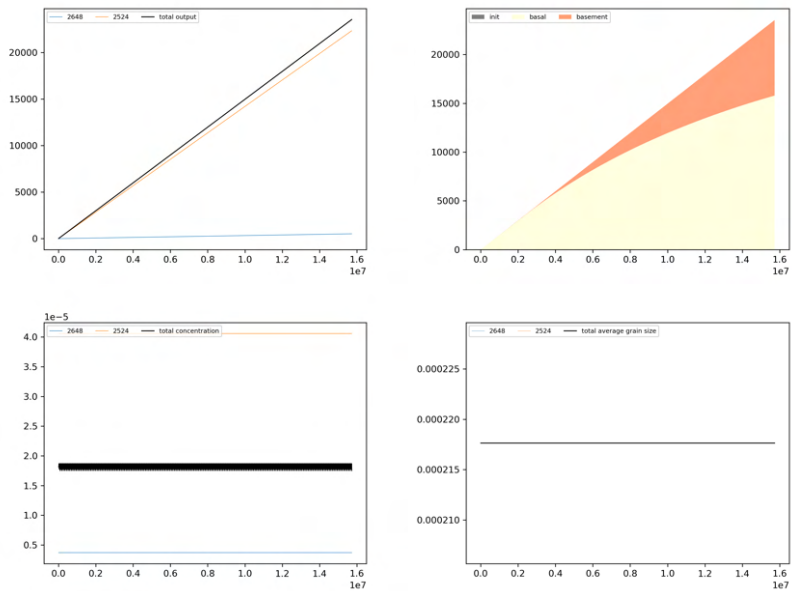

**Figure S107.** Outputs from the B2 reference model run with a) volume flux b) detritus volume flux c) concentration d) grainsize. In a, c and d numbers indicate outlet node IDs



### 2.3.6 B2 default

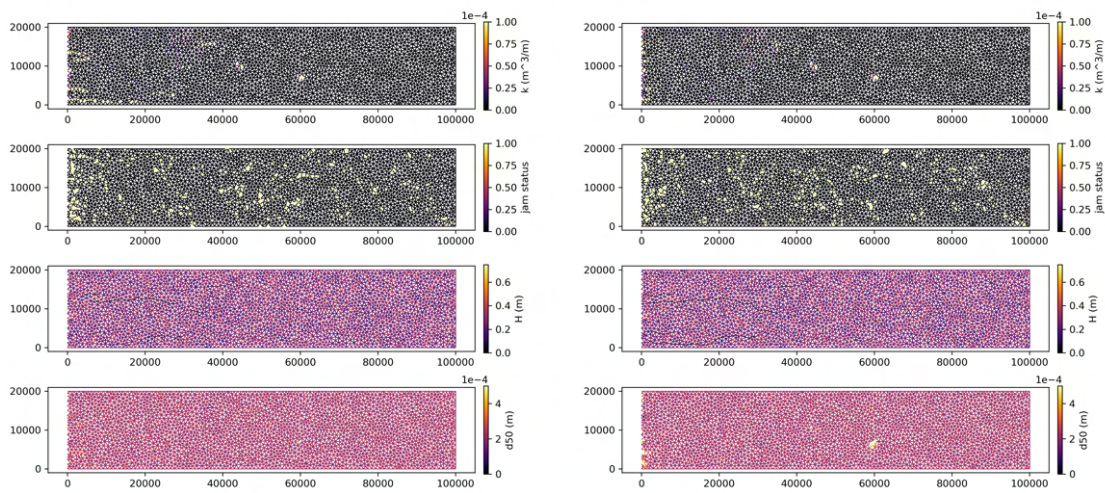

**Figure S108.** Results for the B2 default model run at a) week 0 and b) week 25

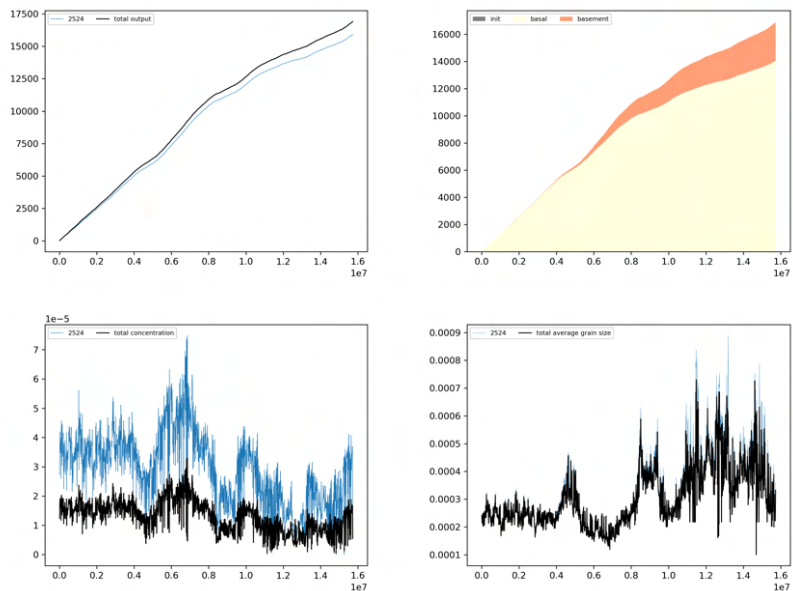

**Figure S109.** Outputs from the B2 default model run with a) volume flux b) detritus volume flux c) concentration d) grainsize. In a, c and d numbers indicate outlet node IDs

### 2.3.7 B2 default rerun

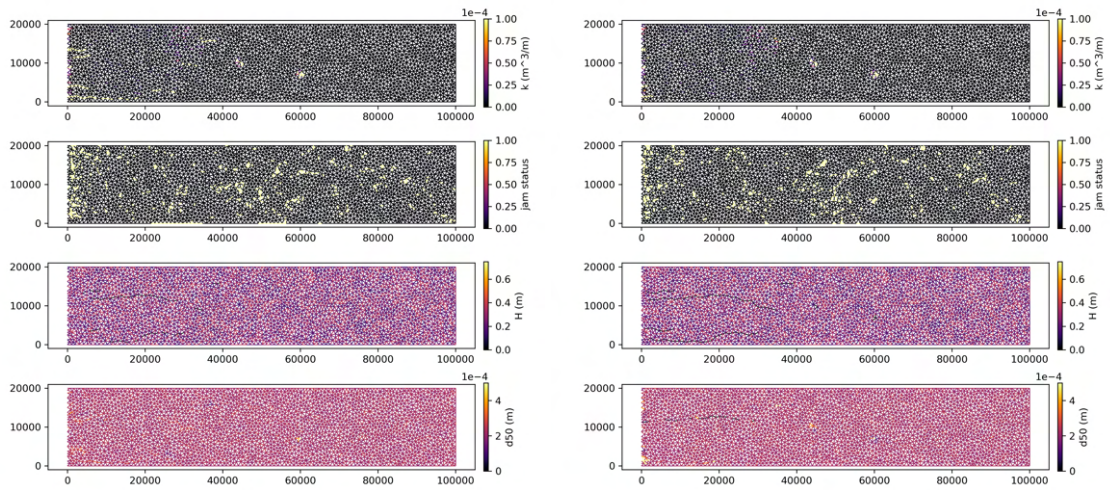

**Figure S110.** Results for the B2 default model rerun at a) week 0 and b) week 25

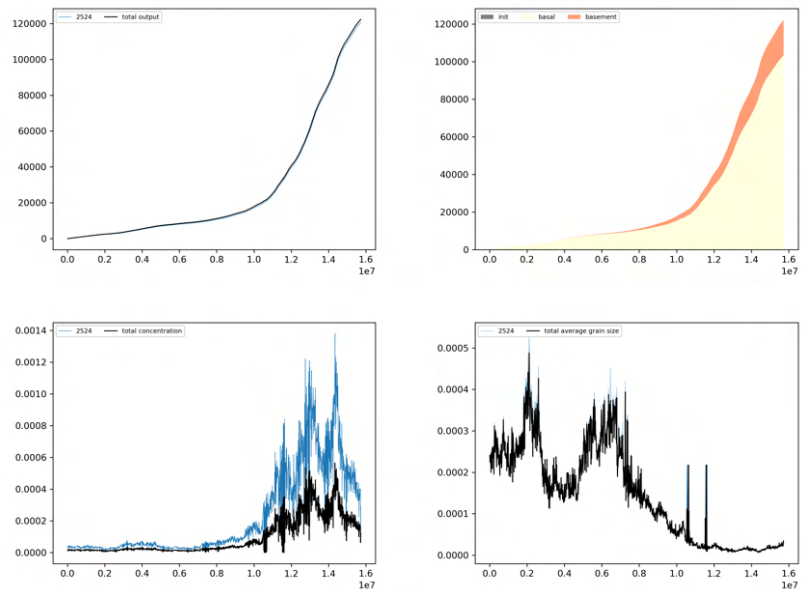

**Figure S111.** Outputs from the B2 default model rerun with a) volume flux b) detritus volume flux c) concentration d) grainsize. In a, c and d numbers indicate outlet node IDs

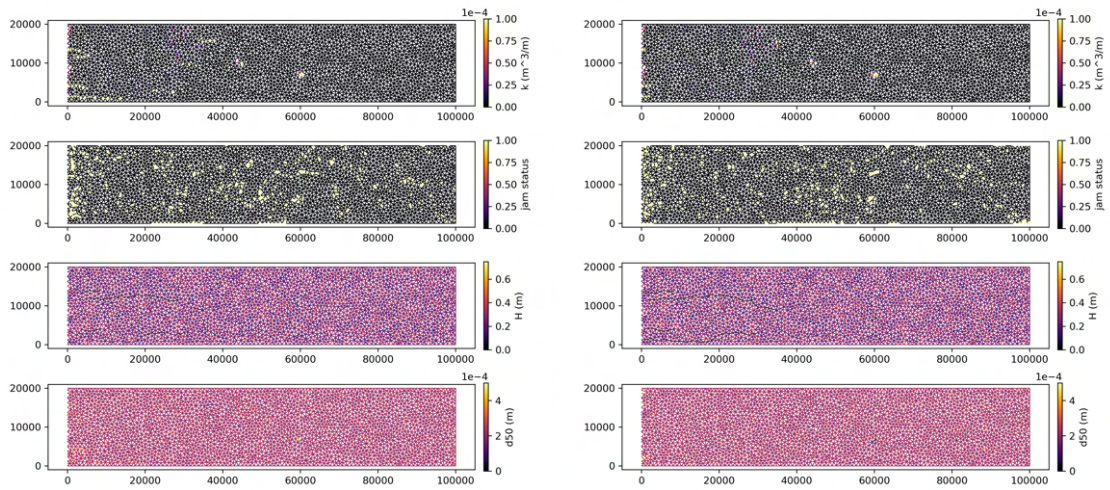

Figure S112. Results for the B2D default model run at a) week 0 and b) week 25

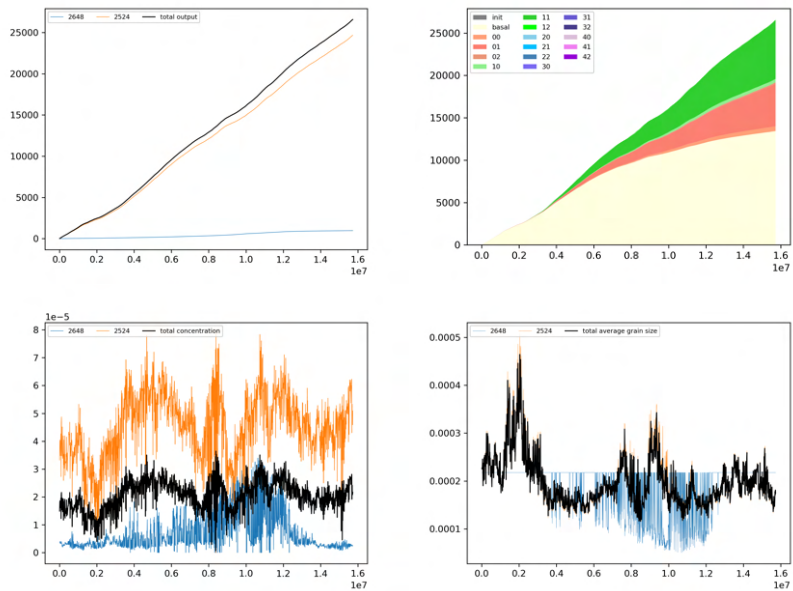

Figure S113. Outputs from the B2D default model run with a) volume flux b) detritus volume flux c) concentration d) grainsize. In a, c and d numbers indicate outlet node IDs

### 2.3.9 B3 reference

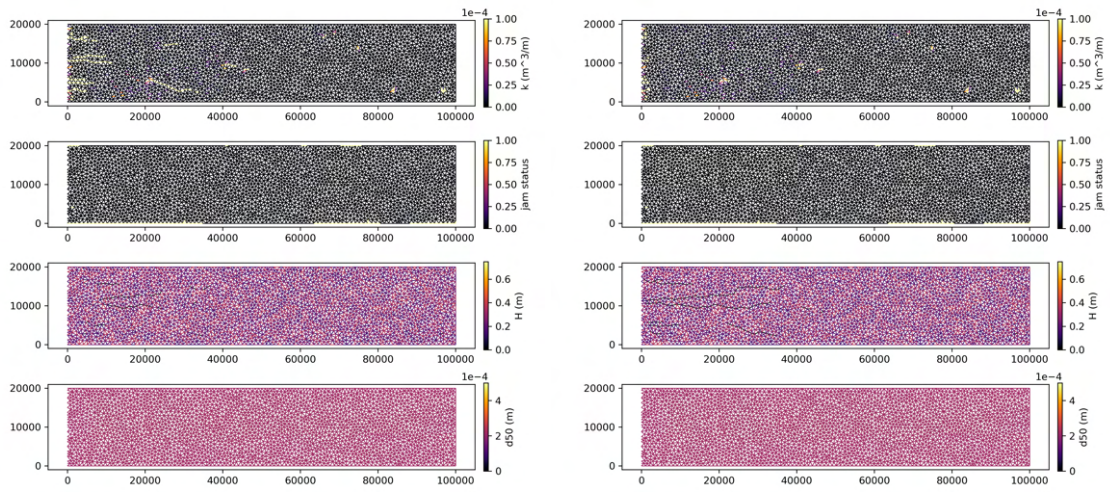

260

**Figure S114.** Results for the B3 reference model run at a) week 0 and b) week 25

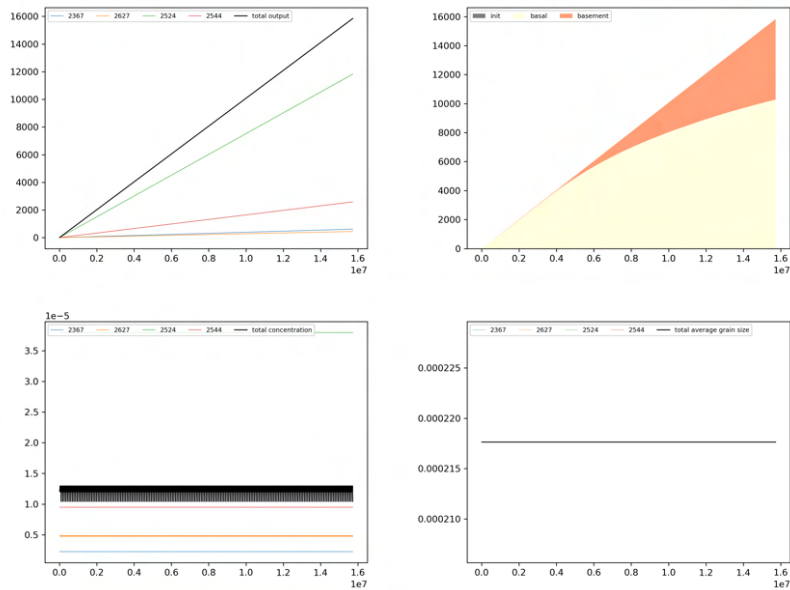

**Figure S115.** Outputs from the B3 reference model run with a) volume flux b) detritus volume flux c) concentration d) grainsize. In a, c and d numbers indicate outlet node IDs

### 2.3.10 B3 default

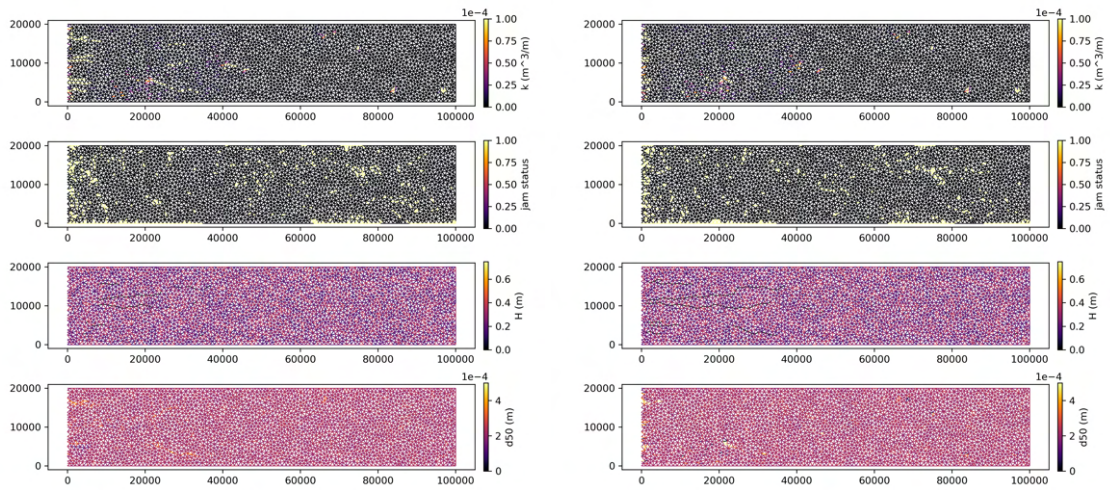

**Figure S116.** Results for the B3 default model run at a) week 0 and b) week 25

265

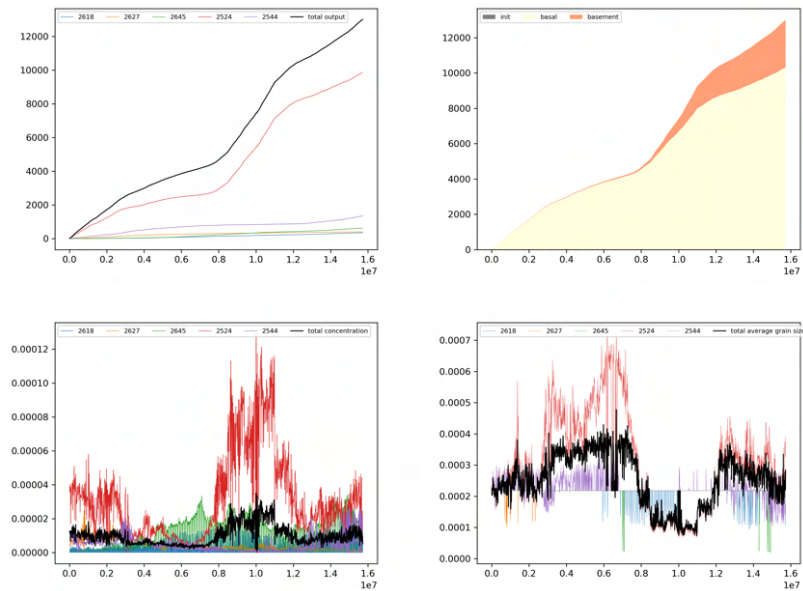

**Figure S117.** Outputs from the B3 default model run with a) volume flux b) detritus volume flux c) concentration d) grainsize. In a, c and d numbers indicate outlet node IDs

### 2.3.11 B3 default rerun

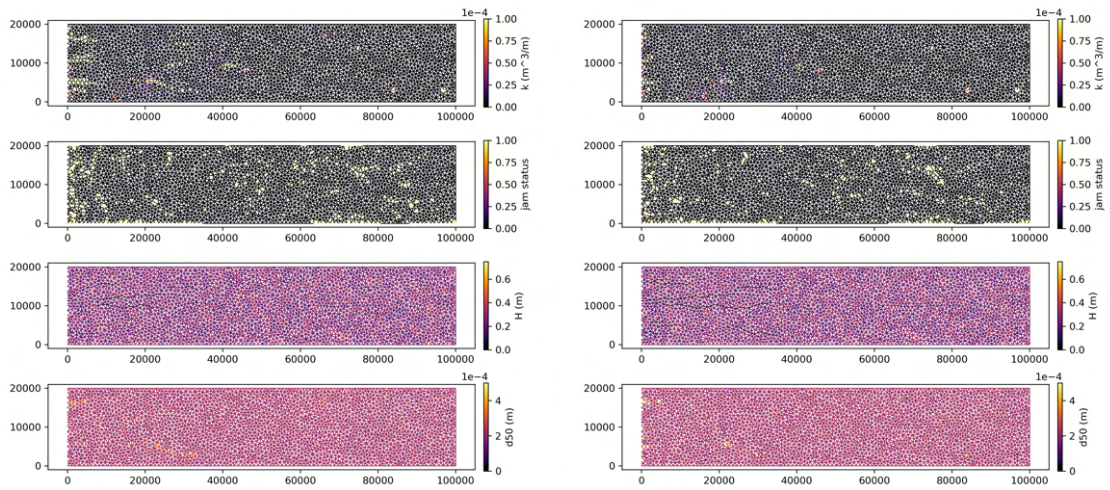

**Figure S118.** Results for the B3 default model rerun at a) week 0 and b) week 25

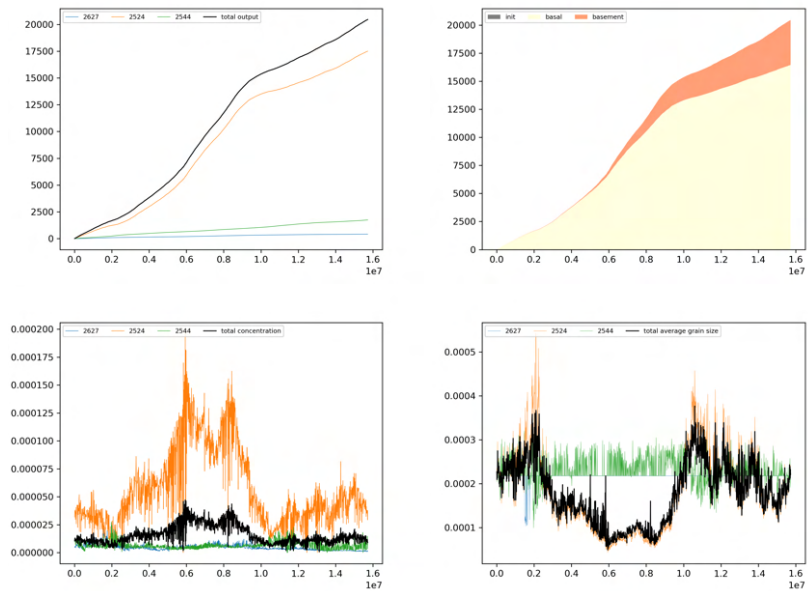

**Figure S119.** Outputs from the B3 default model rerun with a) volume flux b) detritus volume flux c) concentration d) grainsize. In a, c and d numbers indicate outlet node IDs

### 2.3.12 B3D default

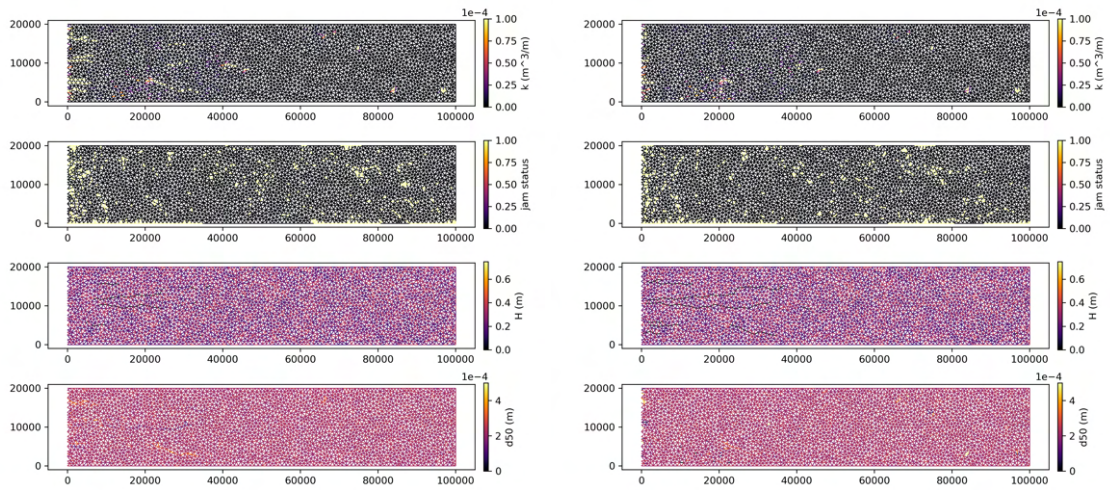

**Figure S120.** Results for the B3D default model run at a) week 0 and b) week 25

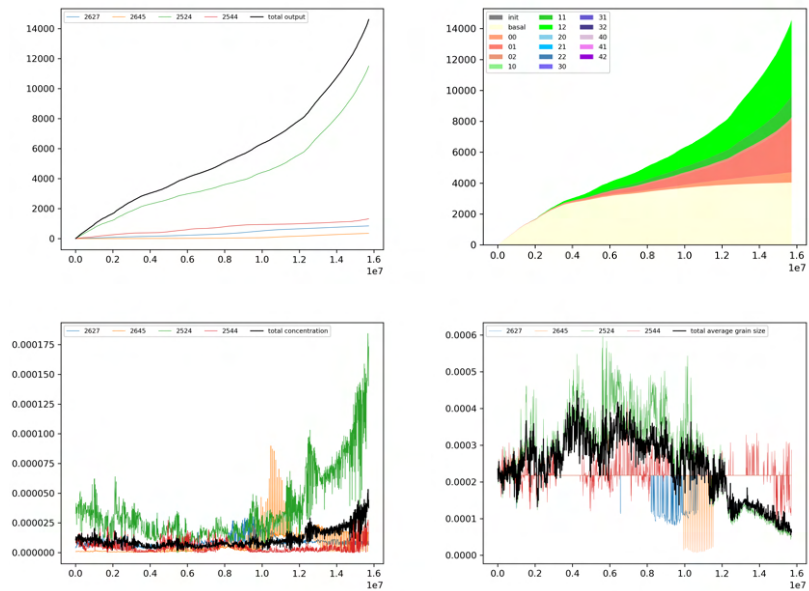

**Figure S121.** Outputs from the B3D default model run with a) volume flux b) detritus volume flux c) concentration d) grainsize. In a, c and d numbers indicate outlet node IDs

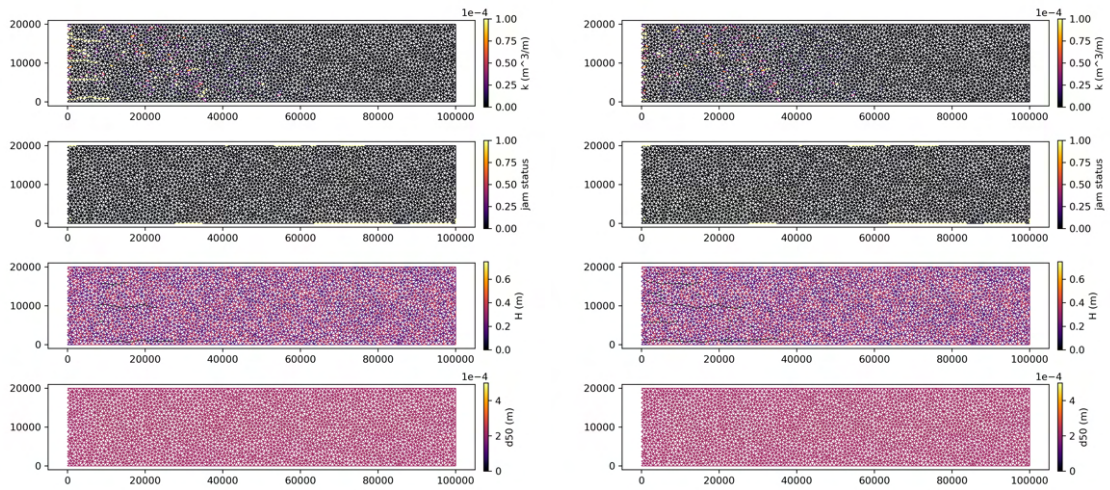

Figure S122. Results for the B4 reference model run at a) week 0 and b) week 25

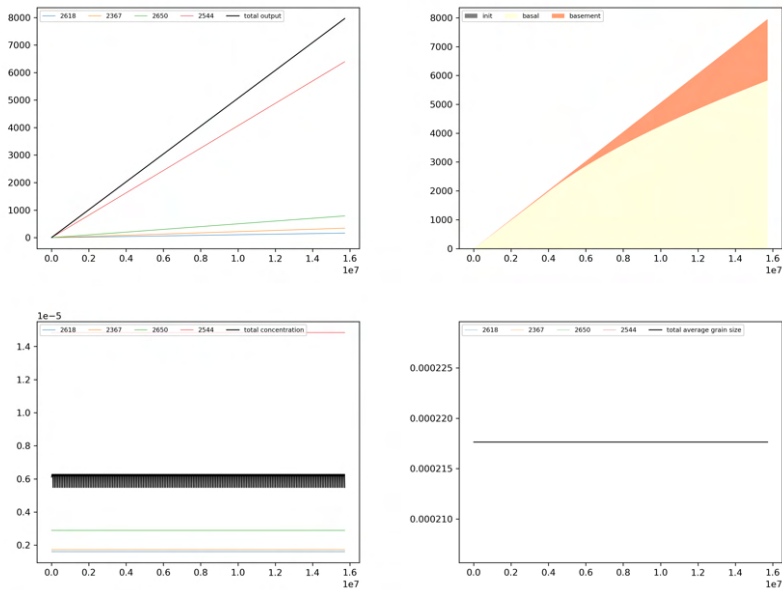

Figure S123. Outputs from the B4 reference model run with a) volume flux b) detritus volume flux c) concentration d) grainsize. In a, c and d numbers indicate outlet node IDs



### 2.3.14 B4 default

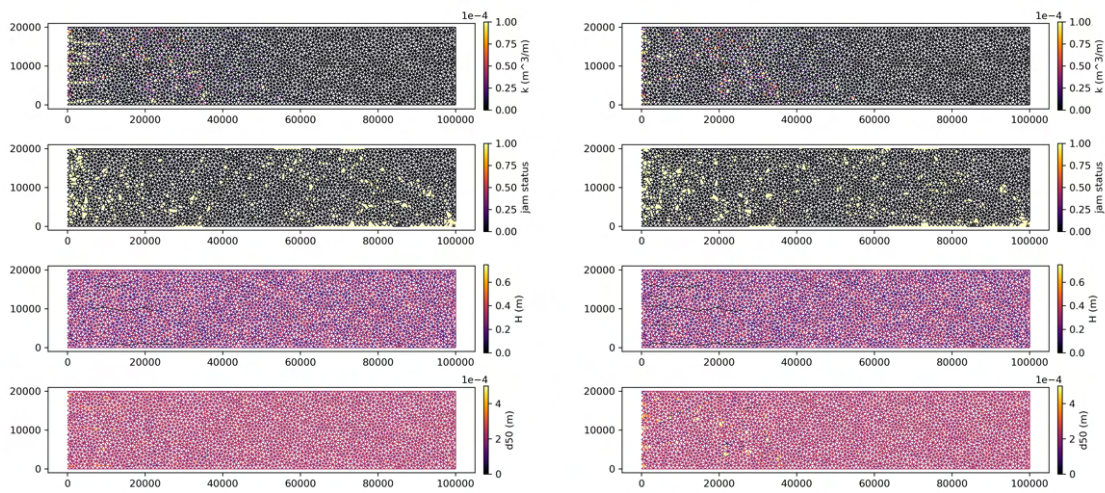

280

**Figure S124.** Results for the B4 default model run at a) week 0 and b) week 25

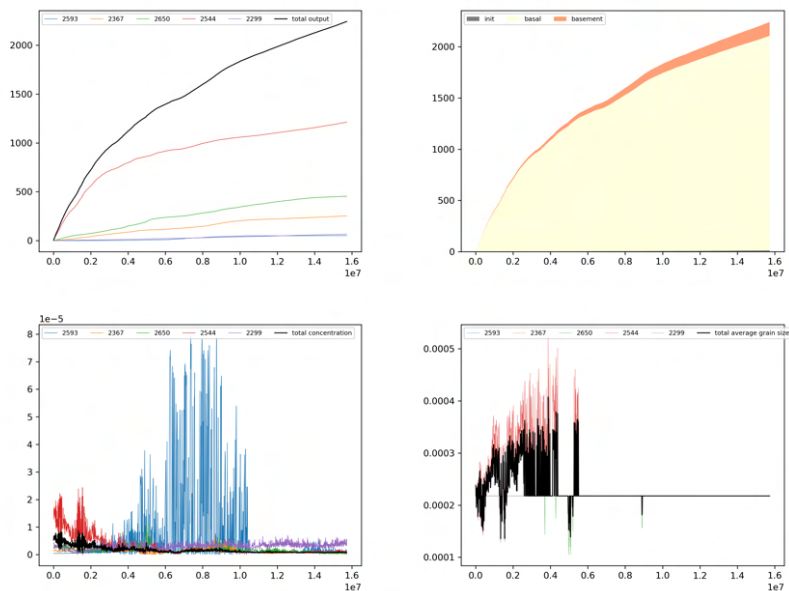

**Figure S125.** Outputs from the B4 default model run with a) volume flux b) detritus volume flux c) concentration d) grainsize. In a, c and d numbers indicate outlet node IDs

### 2.3.15 B4 default rerun

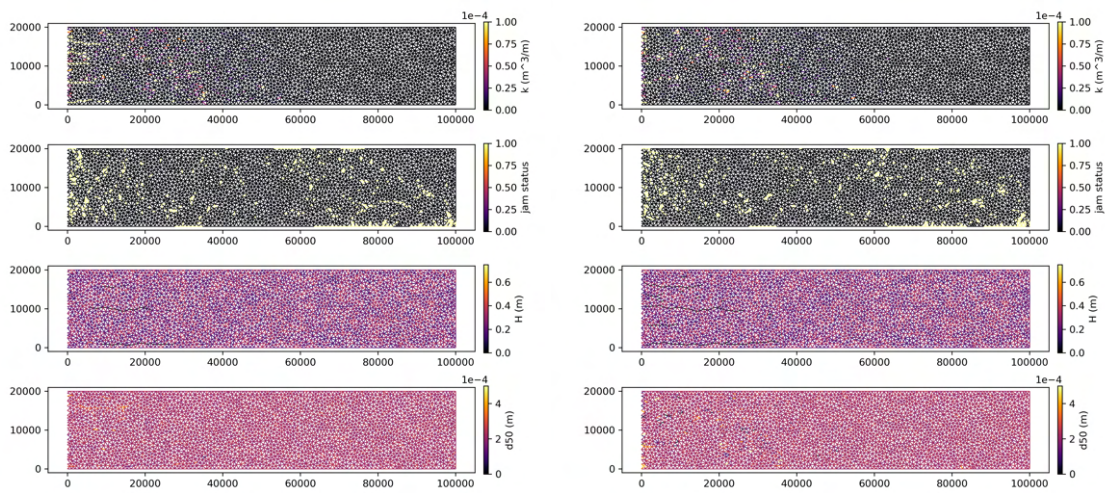

**Figure S126.** Results for the B4 default model rerun at a) week 0 and b) week 25

285

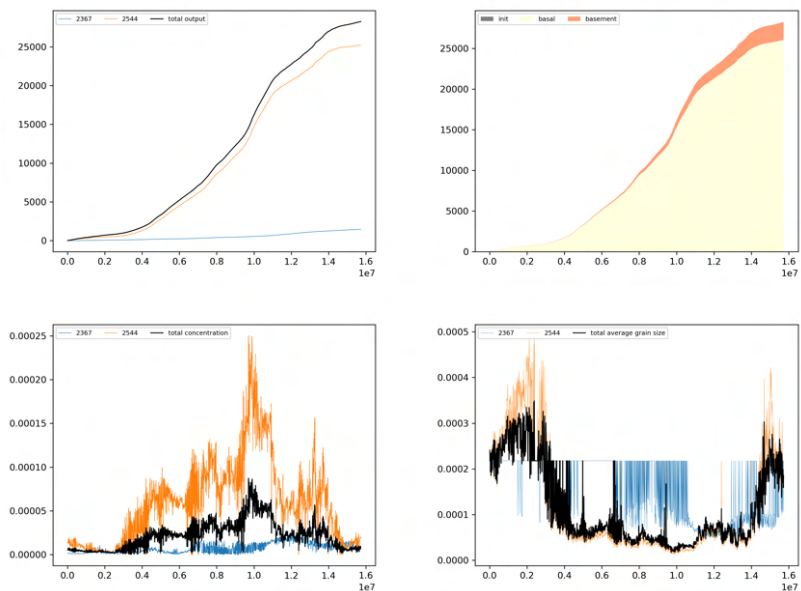

**Figure S127.** Outputs from the B4 default model rerun with a) volume flux b) detritus volume flux c) concentration d) grainsize. In a, c and d numbers indicate outlet node IDs

### 2.3.16 B4D default

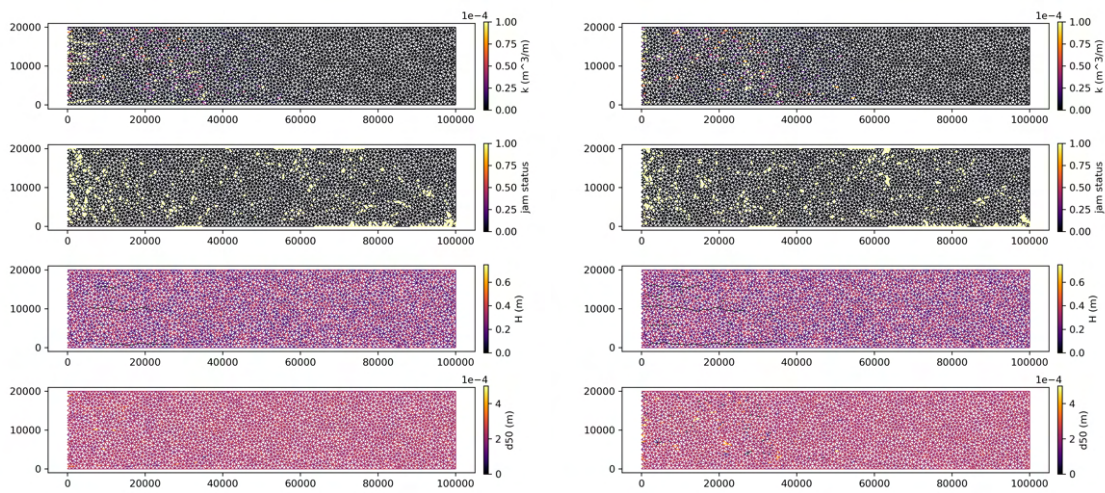

**Figure S128.** Results for the B4D default model run at a) week 0 and b) week 25

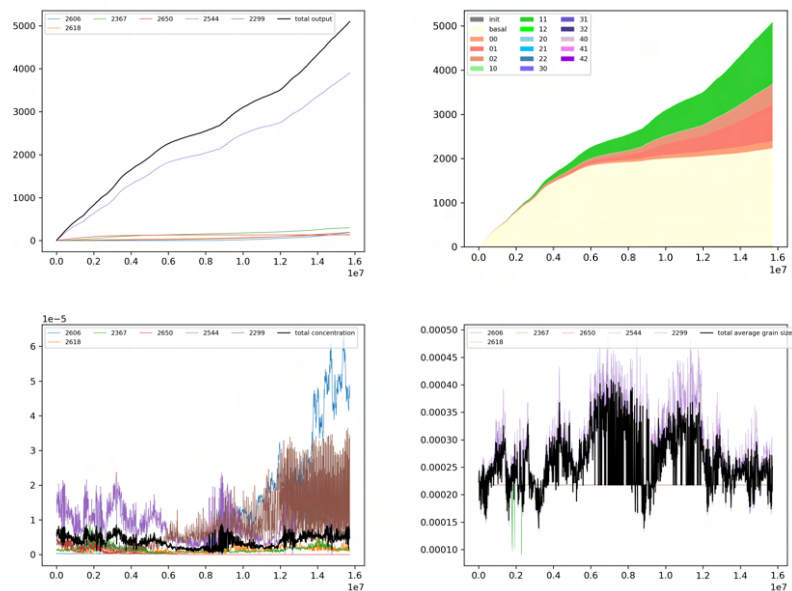

**Figure S129.** Outputs from the B4D default model run with a) volume flux b) detritus volume flux c) concentration d) grainsize. In a, c and d numbers indicate outlet node IDs

### 2.3.17 B5 reference

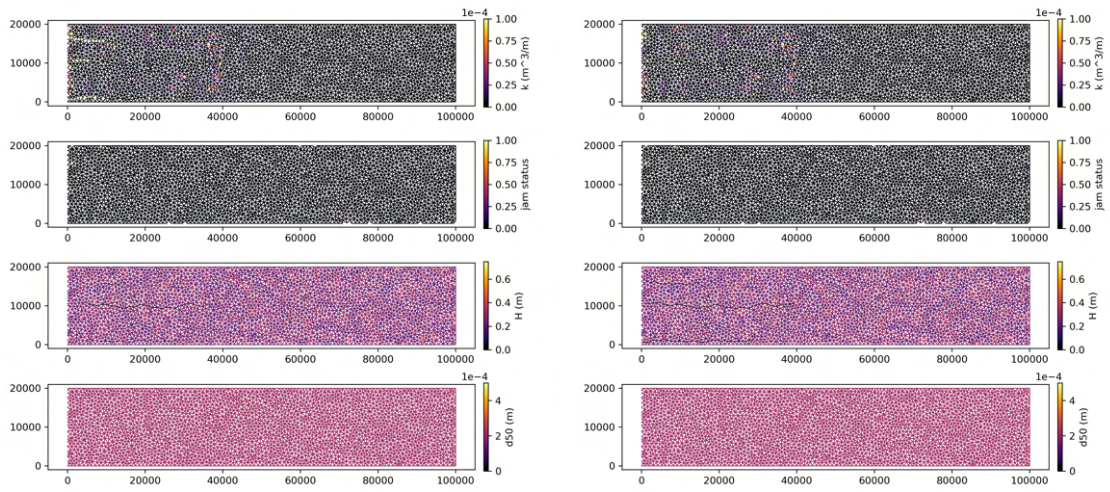

**Figure S130.** Results for the B5 reference model run at a) week 0 and b) week 25

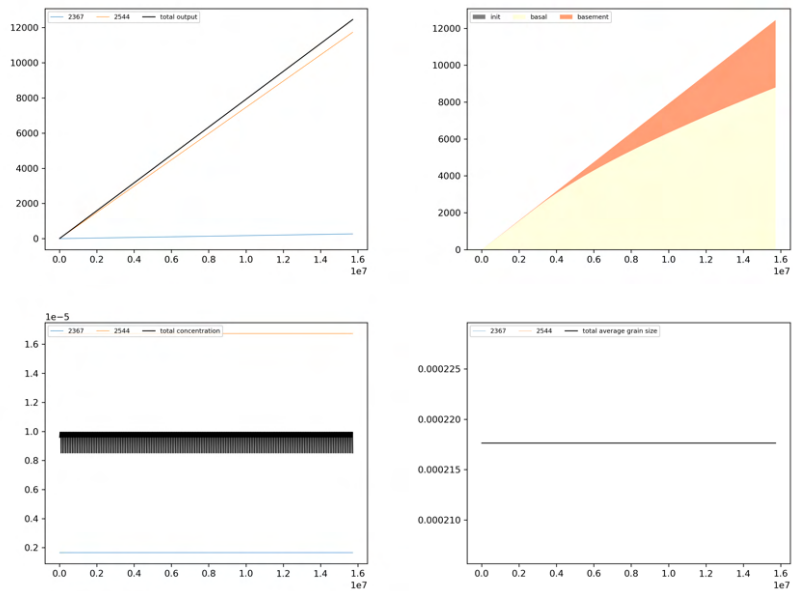

**Figure S131.** Outputs from the B5 reference model run with a) volume flux b) detritus volume flux c) concentration d) grainsize. In a, c and d numbers indicate outlet node IDs

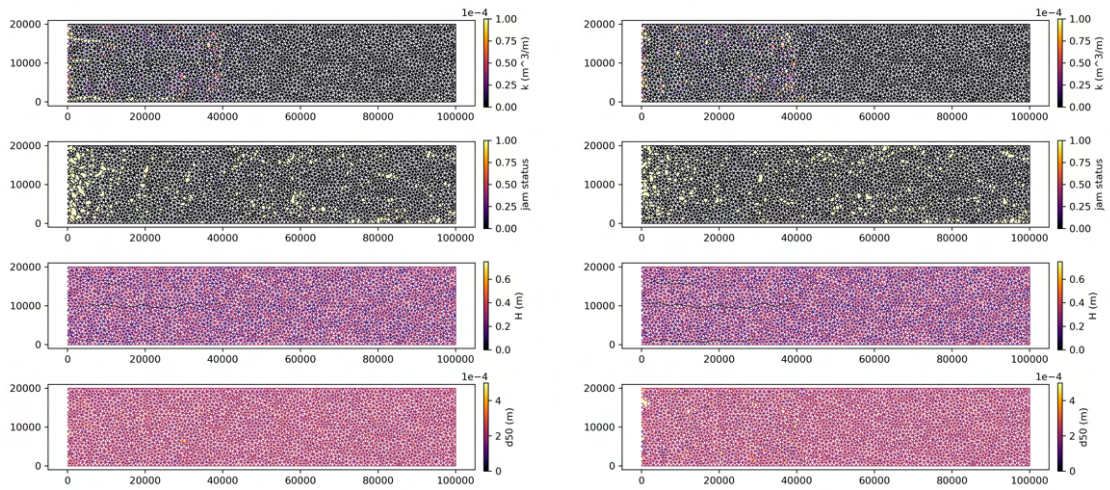

Figure S132. Results for the B5 default model run at a) week 0 and b) week 25

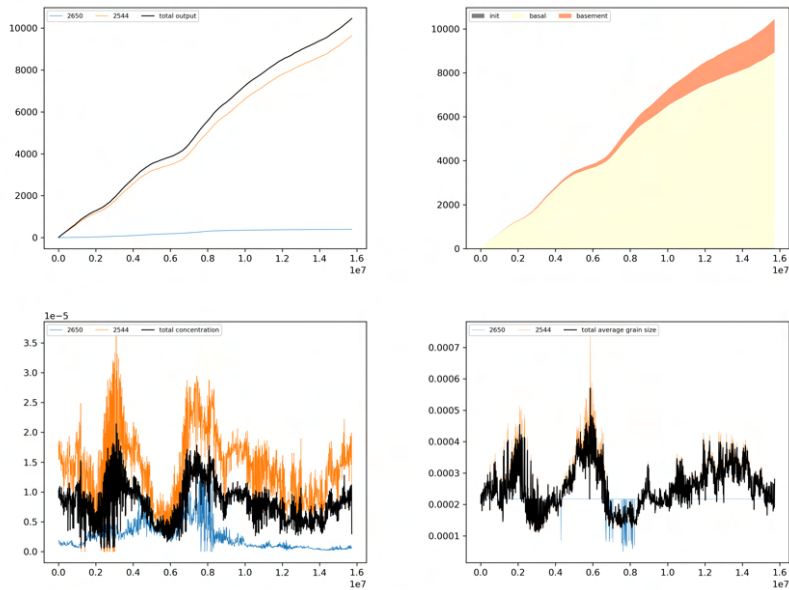

Figure S133. Outputs from the B5 default model run with a) volume flux b) detritus volume flux c) concentration d) grainsize. In a, c and d numbers indicate outlet node IDs

### 2.3.19 B5 default rerun

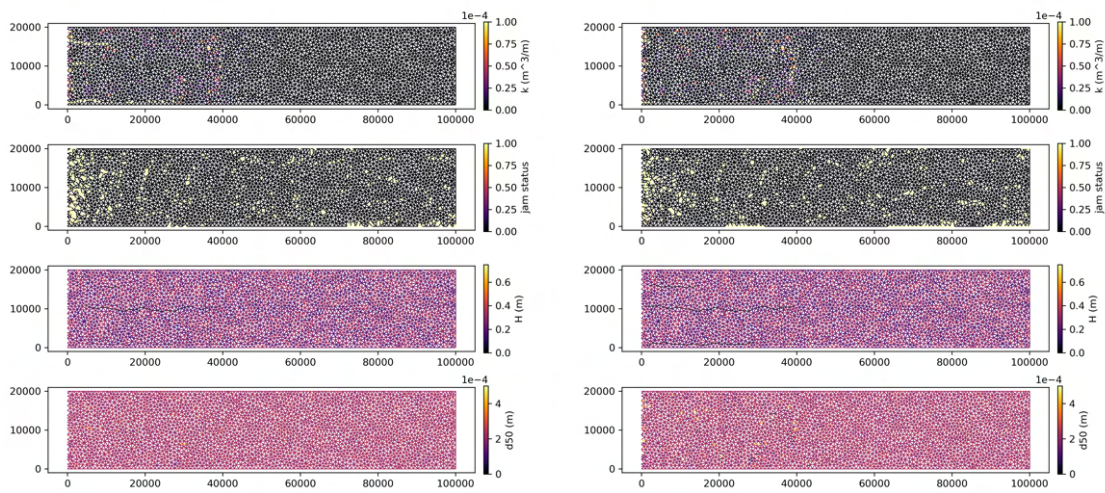

300

**Figure S134.** Results for the B5 default model rerun at a) week 0 and b) week 25

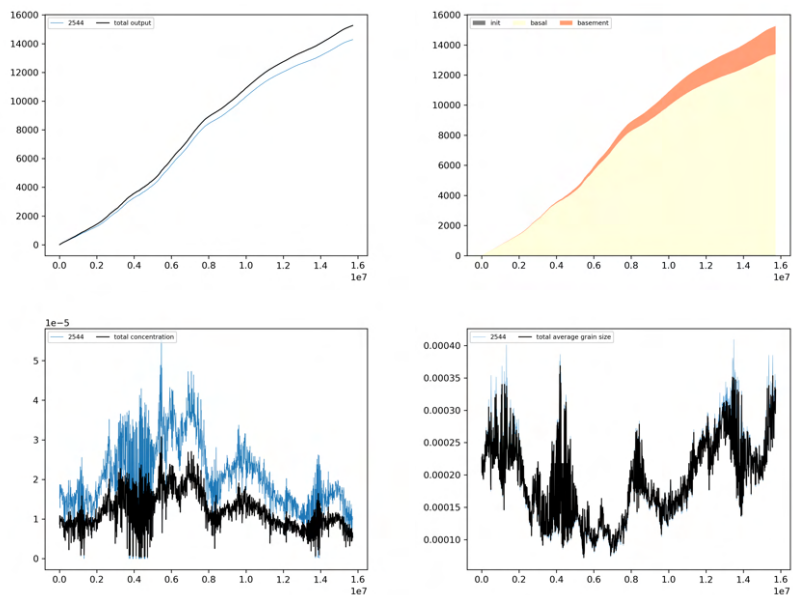

**Figure S135.** Outputs from the B5 default model rerun with a) volume flux b) detritus volume flux c) concentration d) grainsize. In a, c and d numbers indicate outlet node IDs

### 2.3.20 B5D default

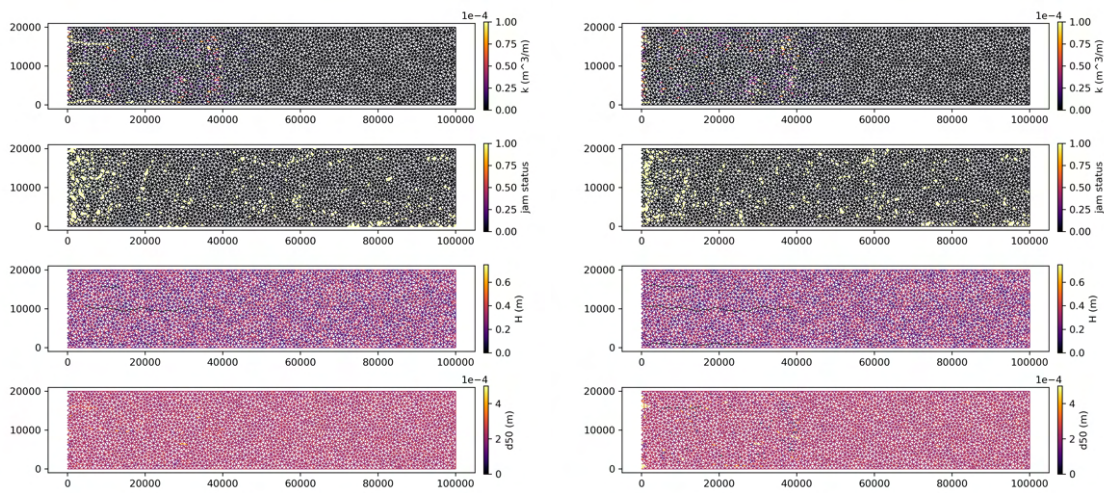

**Figure S136.** Results for the B5D default model run at a) week 0 and b) week 25

305

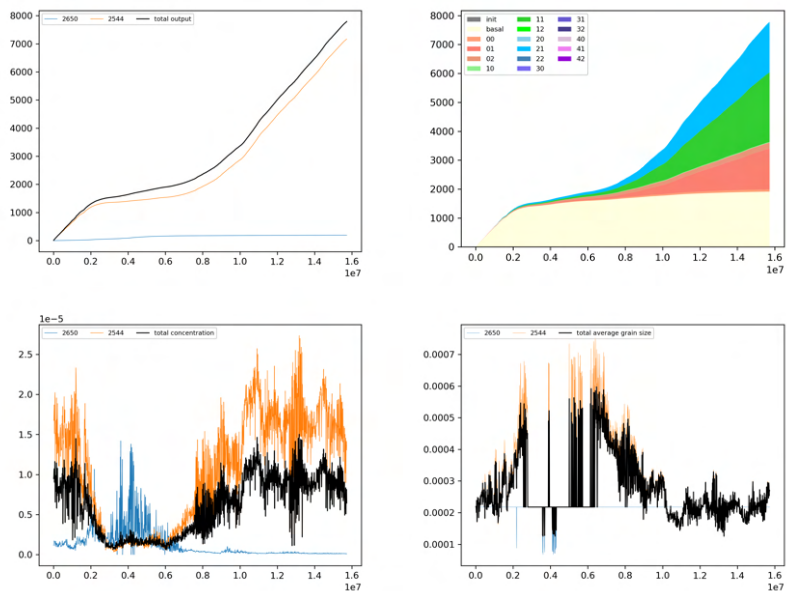

**Figure S137.** Outputs from the B5D default model run with a) volume flux b) detritus volume flux c) concentration d) grainsize. In a, c and d numbers indicate outlet node IDs

## 2.4 Experiment Set 4

### 2.4.1 C0 reference

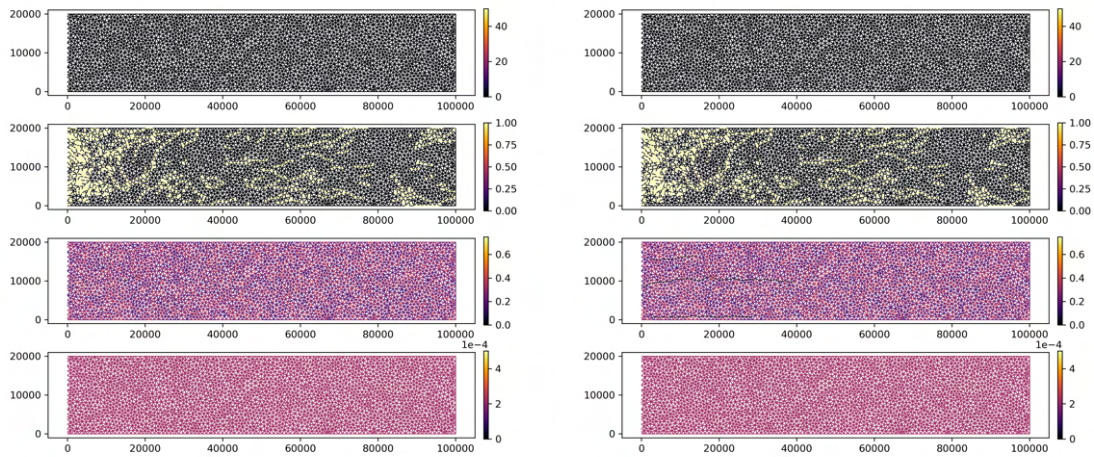

**Figure S138.** Results for the C0 reference model run at a) day 0 and b) day 49

310

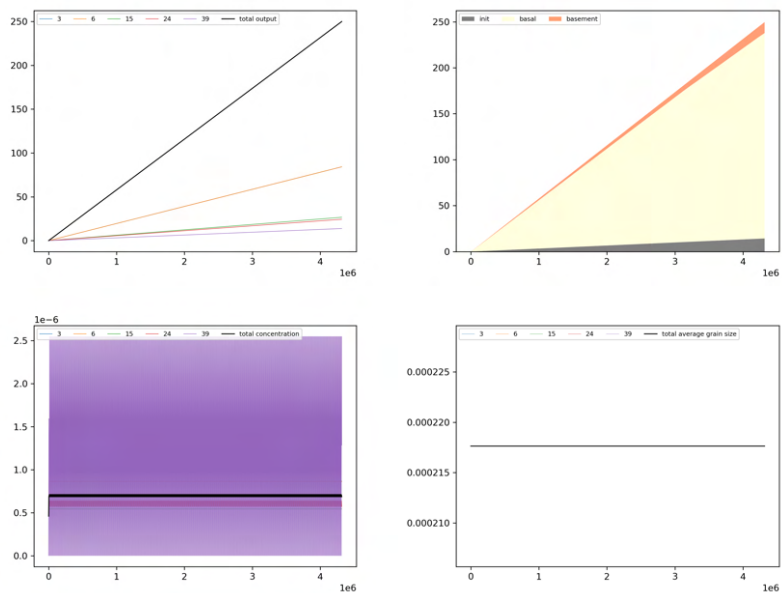

**Figure S139.** Outputs from the C0 reference model run with a) volume flux b) detritus volume flux c) concentration d) grainsize. In a, c and d numbers indicate outlet node IDs



## 2.4.2 C0 default

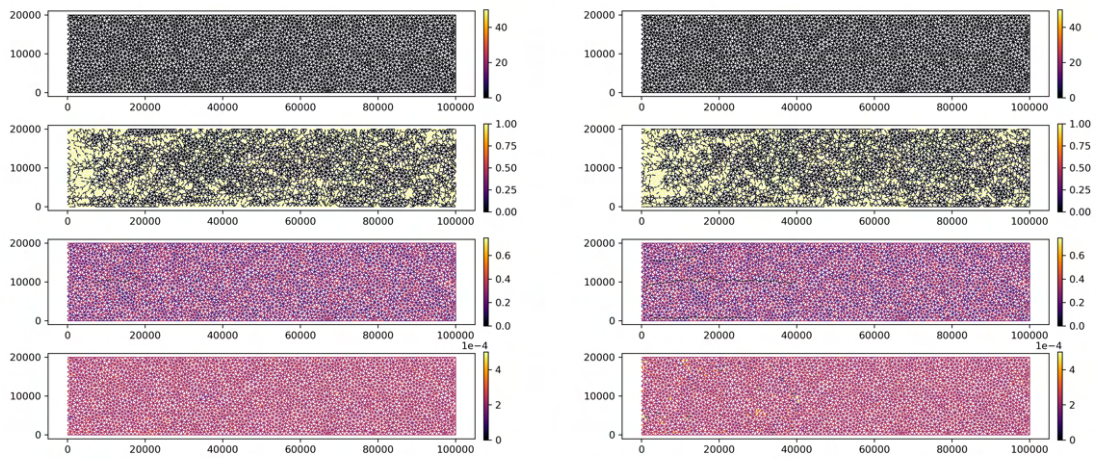

**Figure S140.** Results for the C0 default model run at a) day 0 and b) day 49

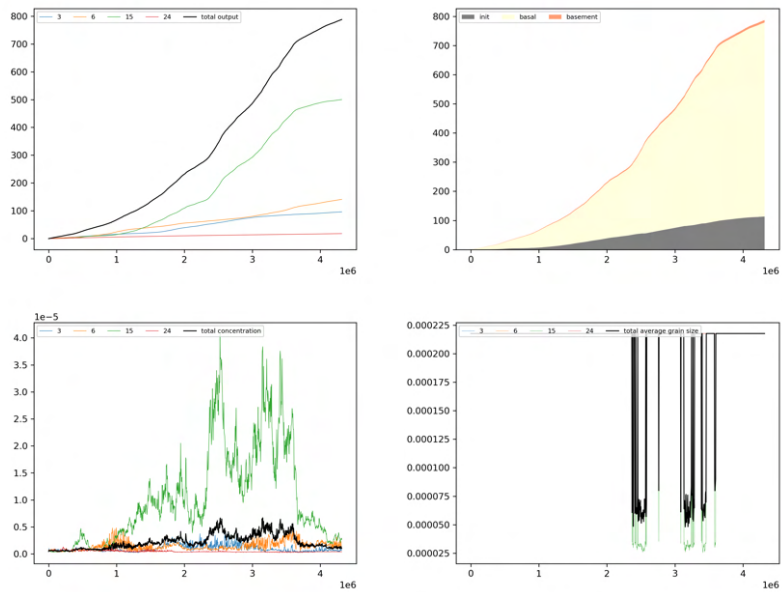

315

**Figure S141.** Outputs from the C0 default model run with a) volume flux b) detritus volume flux c) concentration d) grainsize. In a, c and d numbers indicate outlet node IDs

### 2.4.3 COD default

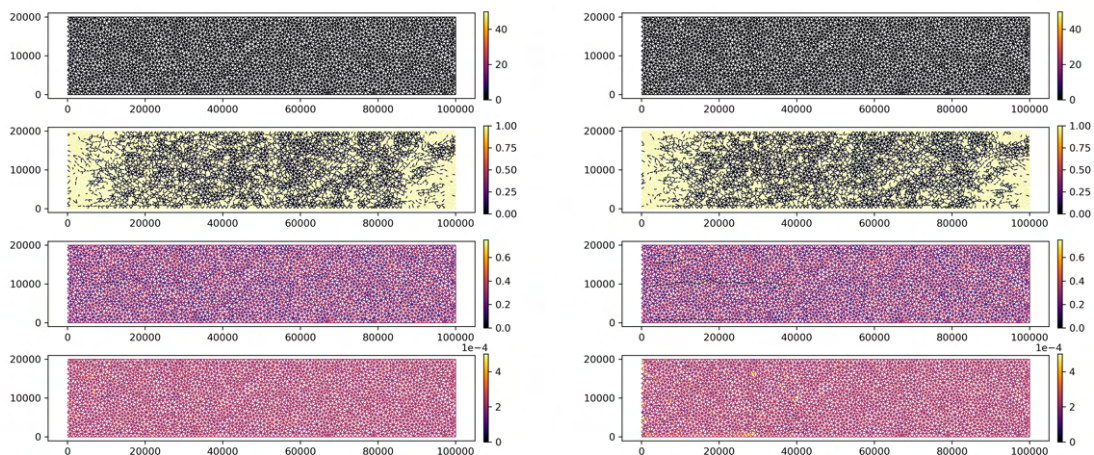

**Figure S142.** Results for the COD default model run at a) day 0 and b) day 49

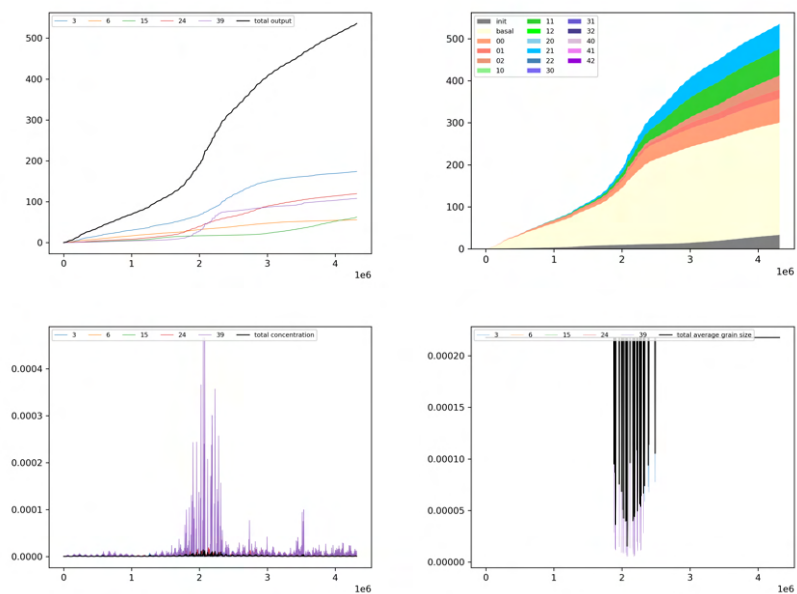

**Figure S143.** Outputs from the COD default model run with a) volume flux b) detritus volume flux c) concentration d) grainsize. In a, c and d numbers indicate outlet node IDs

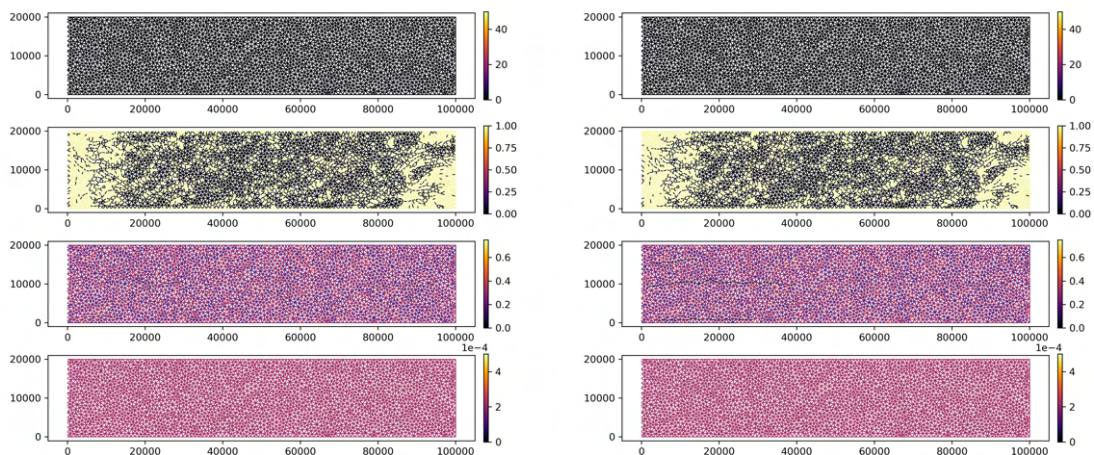

**Figure S144.** Results for the C1 reference model run at a) day 0 and b) day 49

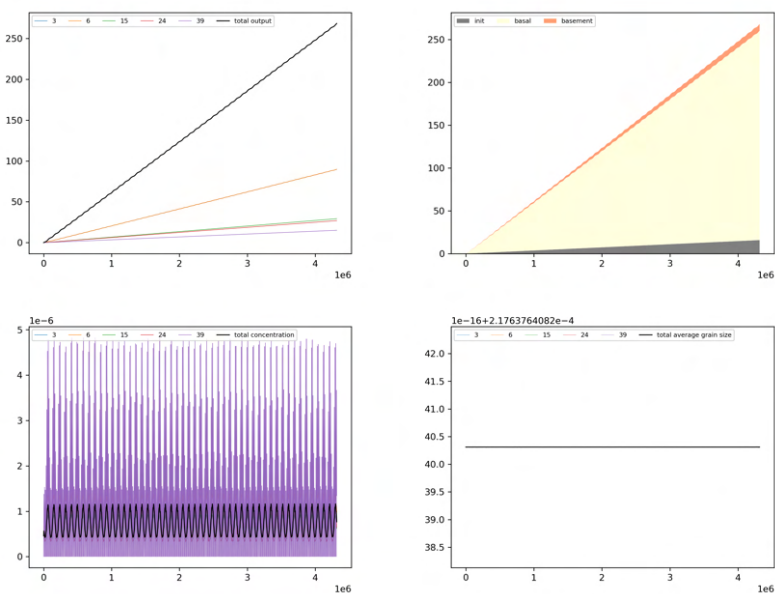

**Figure S145.** Outputs from the C1 reference model run with a) volume flux b) detritus volume flux c) concentration d) grainsize. In a, c and d numbers indicate outlet node IDs

## 2.4.5 C1 default

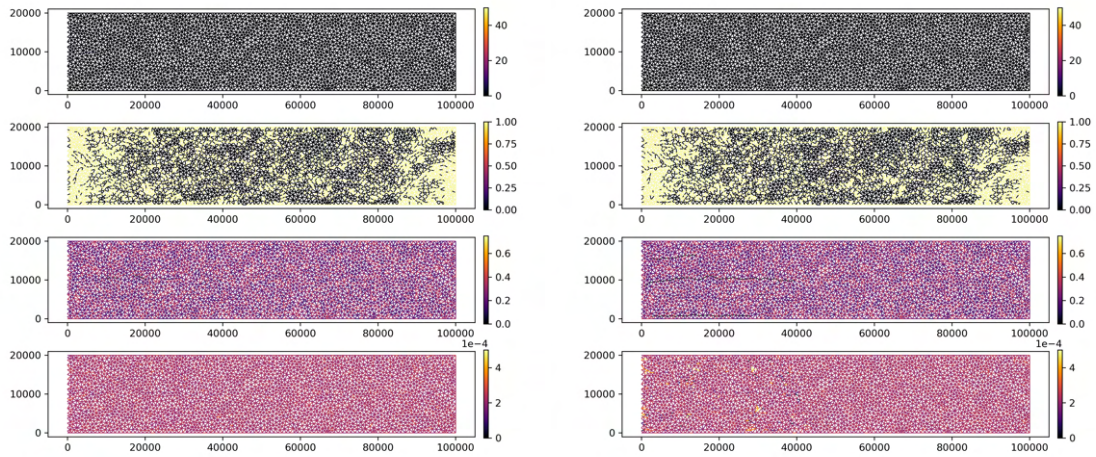

325

**Figure S146.** Results for the C1 default model run at a) day 0 and b) day 49

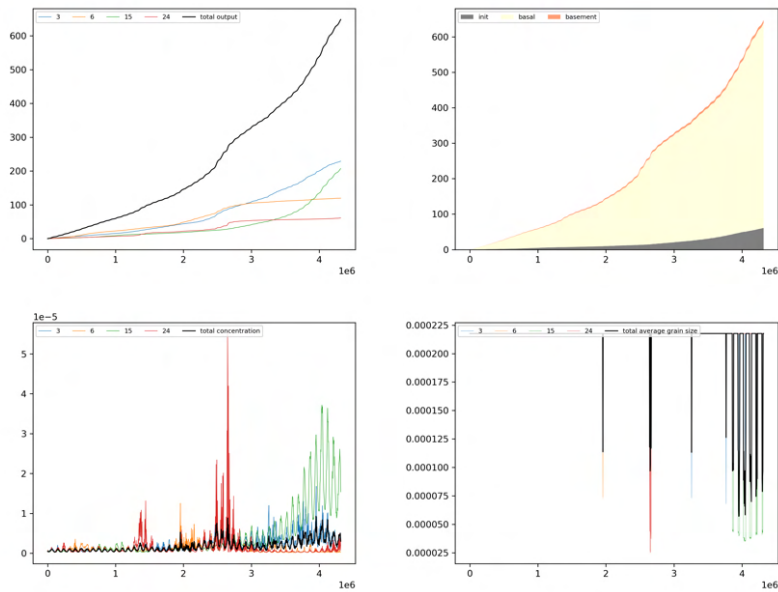

**Figure S147.** Outputs from the C1 default model run with a) volume flux b) detritus volume flux c) concentration d) grainsize. In a, c and d numbers indicate outlet node IDs

## 2.4.6 C1D default

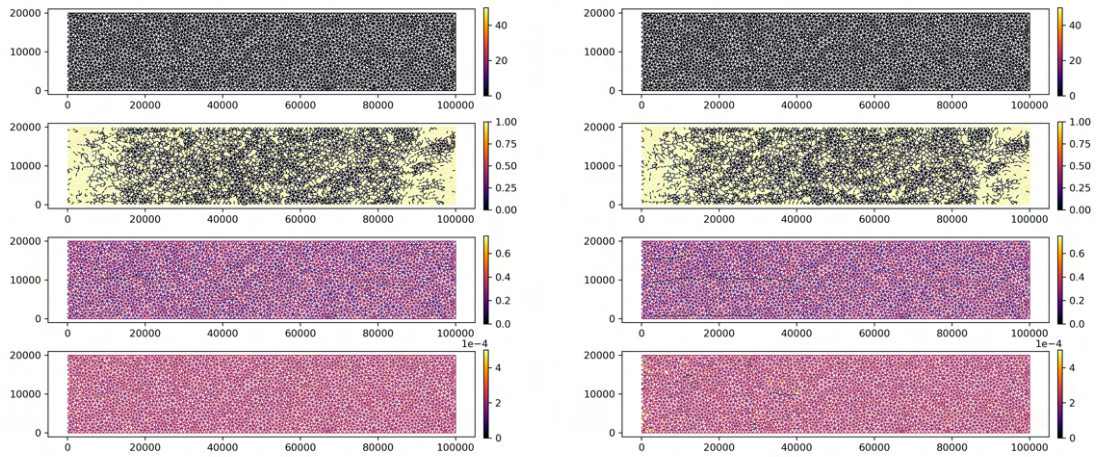

**Figure S148.** Results for the C1D default model run at a) day 0 and b) day 49

330

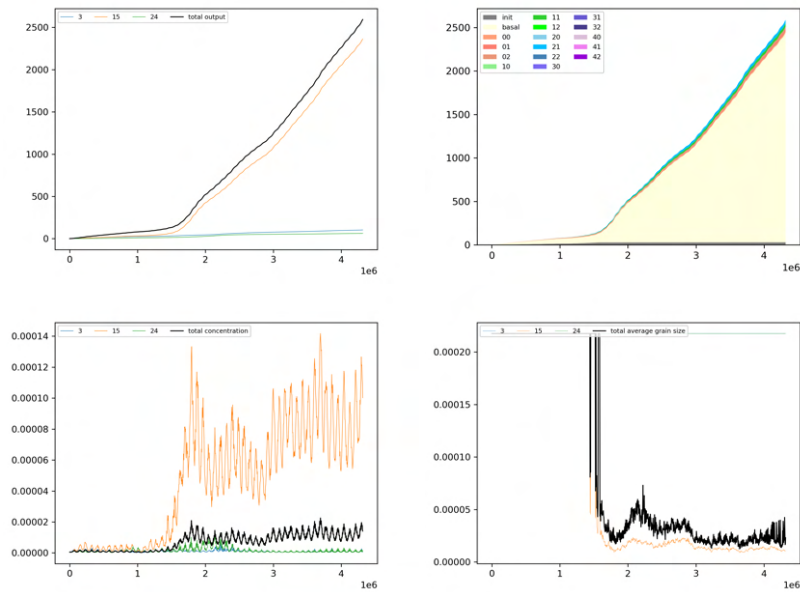

**Figure S149.** Outputs from the C1D default model run with a) volume flux b) detritus volume flux c) concentration d) grainsize. In a, c and d numbers indicate outlet node IDs

## 2.4.7 C2 reference

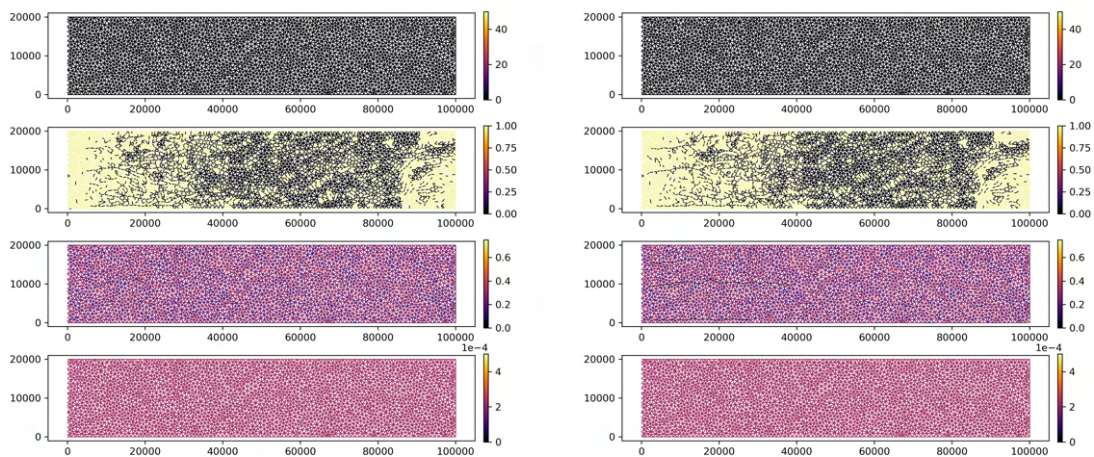

**Figure S150.** Results for the C2 reference model run at a) day 0 and b) day 49

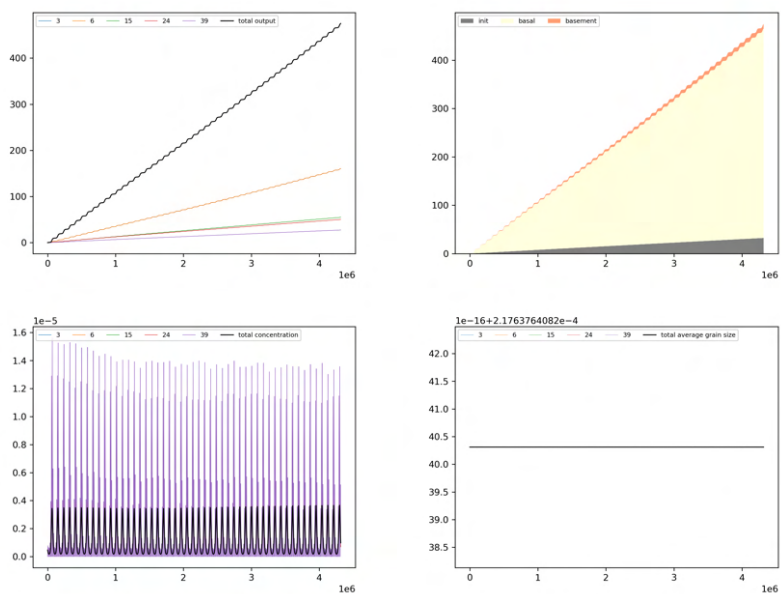

335

**Figure S151.** Outputs from the C2 reference model run with a) volume flux b) detritus volume flux c) concentration d) grainsize. In a, c and d numbers indicate outlet node IDs

## 2.4.8 C2 default

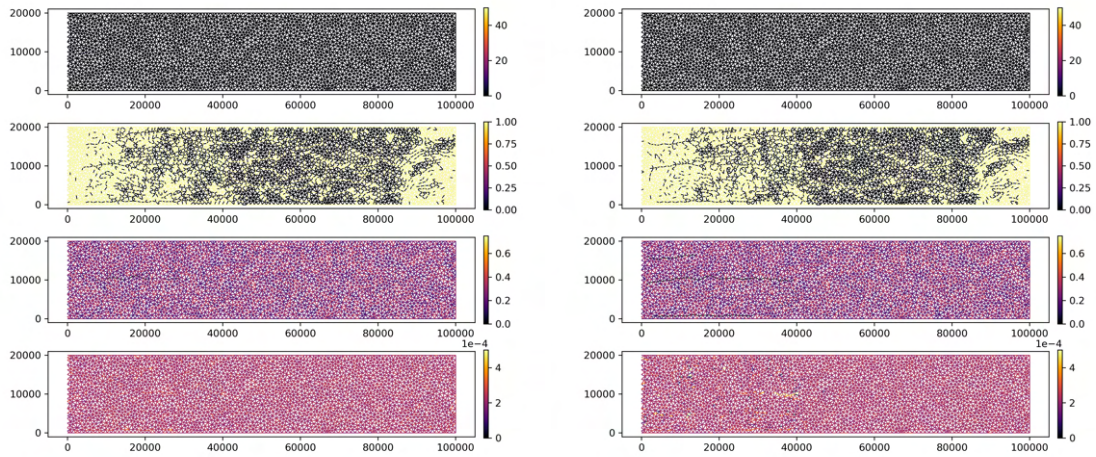

**Figure S152.** Results for the C2 default model run at a) day 0 and b) day 49

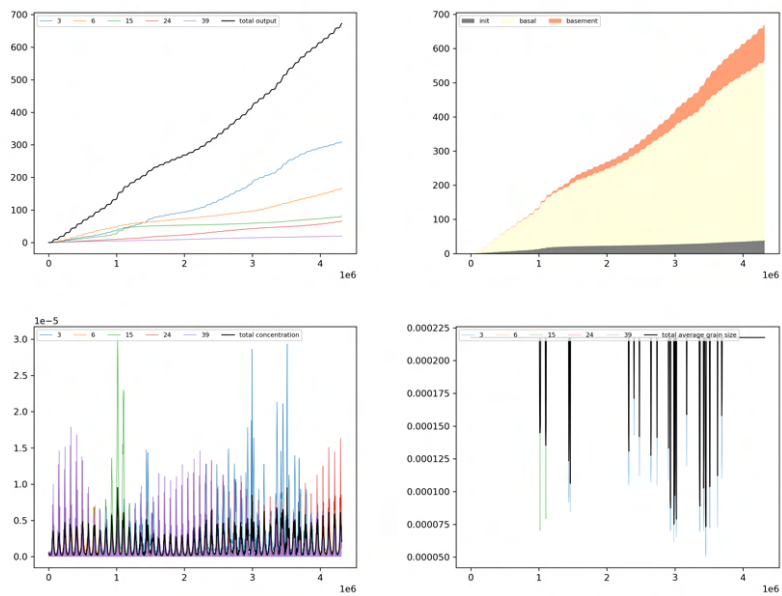

**Figure S153.** Outputs from the C2 default model run with a) volume flux b) detritus volume flux c) concentration d) grainsize. In a, c and d numbers indicate outlet node IDs

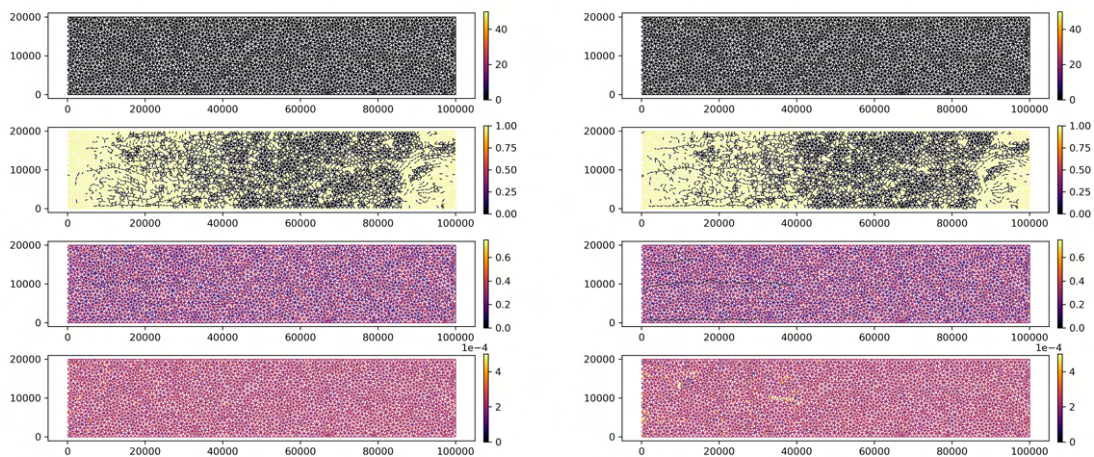

Figure S154. Results for the C2D default model run at a) day 0 and b) day 49

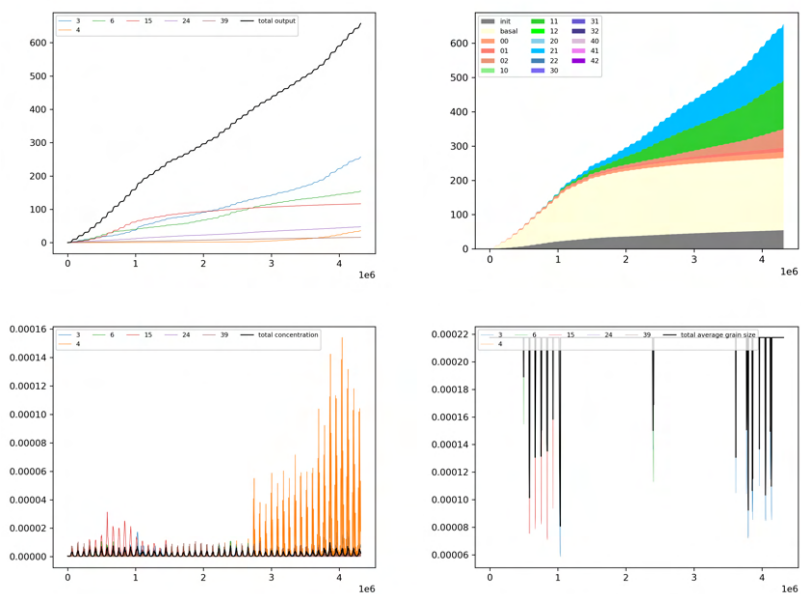

Figure S155. Outputs from the C2D default model run with a) volume flux b) detritus volume flux c) concentration d) grainsize. In a, c and d numbers indicate outlet node IDs



## 2.4.10 C3 reference

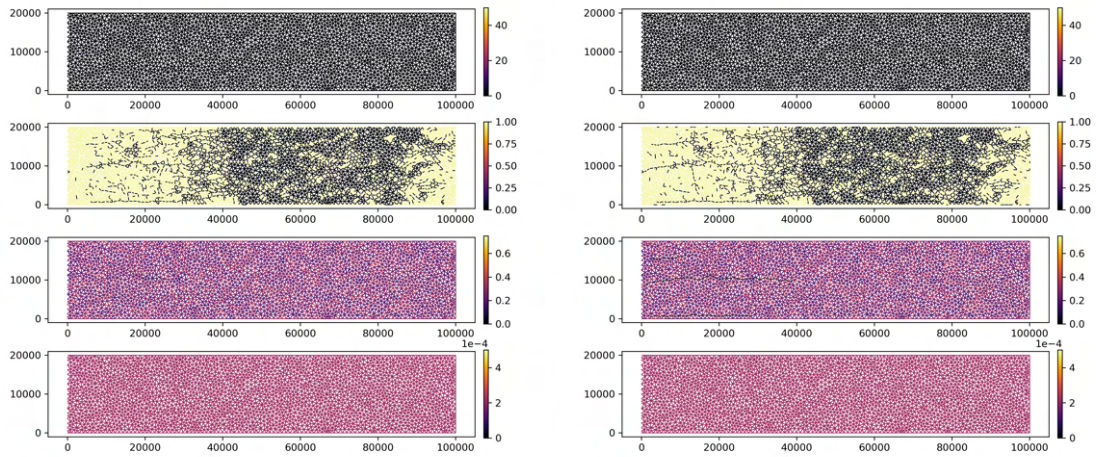

345

**Figure S156.** Results for the C3 reference model run at a) day 0 and b) day 49

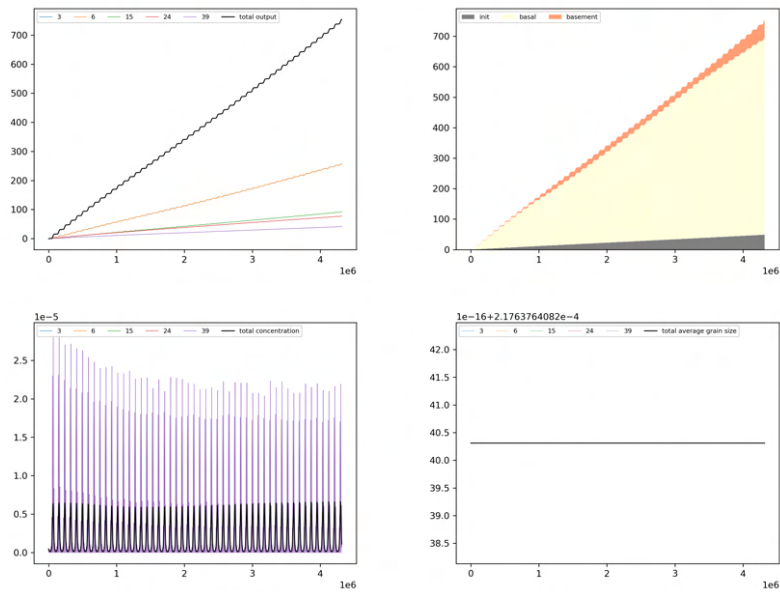

**Figure S157.** Outputs from the C3 reference model run with a) volume flux b) detritus volume flux c) concentration d) grainsize. In a, c and d numbers indicate outlet node IDs

### 2.4.11 C3 default

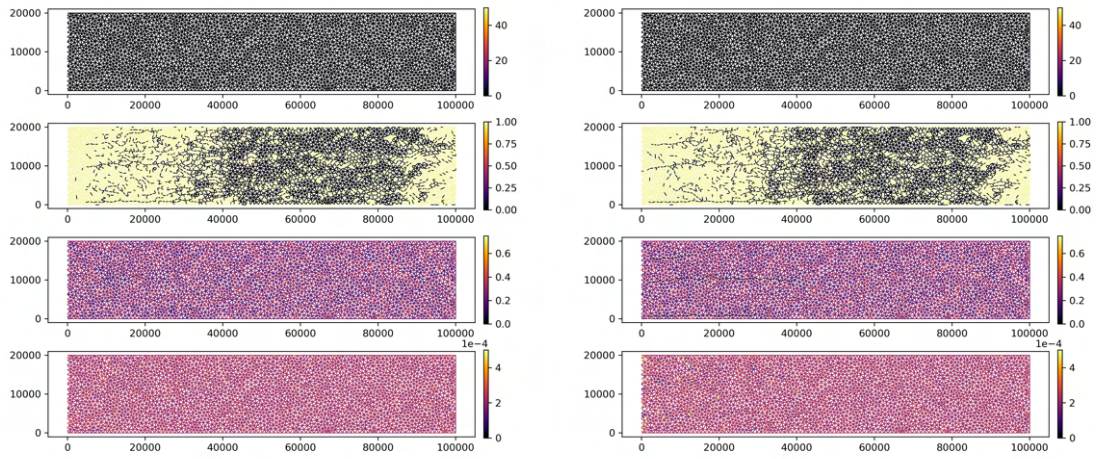

**Figure S158.** Results for the C3 default model run at a) day 0 and b) day 49

350

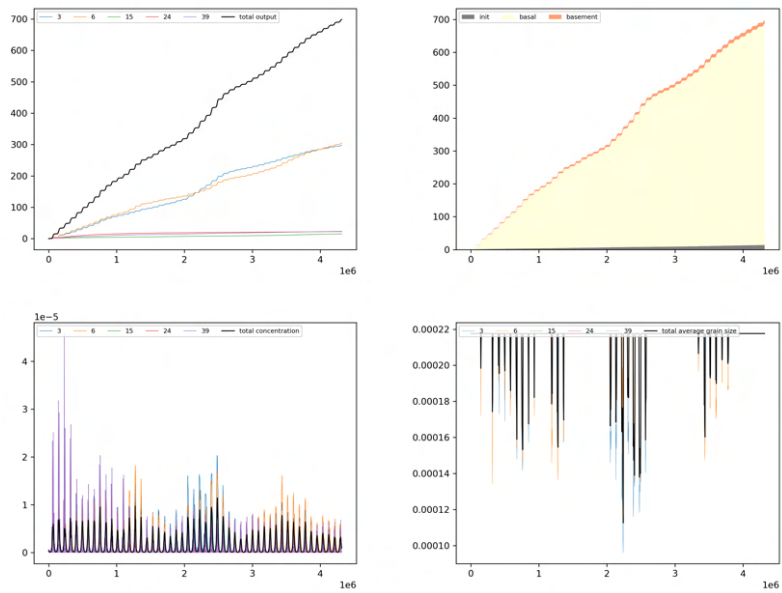

**Figure S159.** Outputs from the C3 default model run with a) volume flux b) detritus volume flux c) concentration d) grainsize. In a, c and d numbers indicate outlet node IDs

## 2.4.12 C3D default

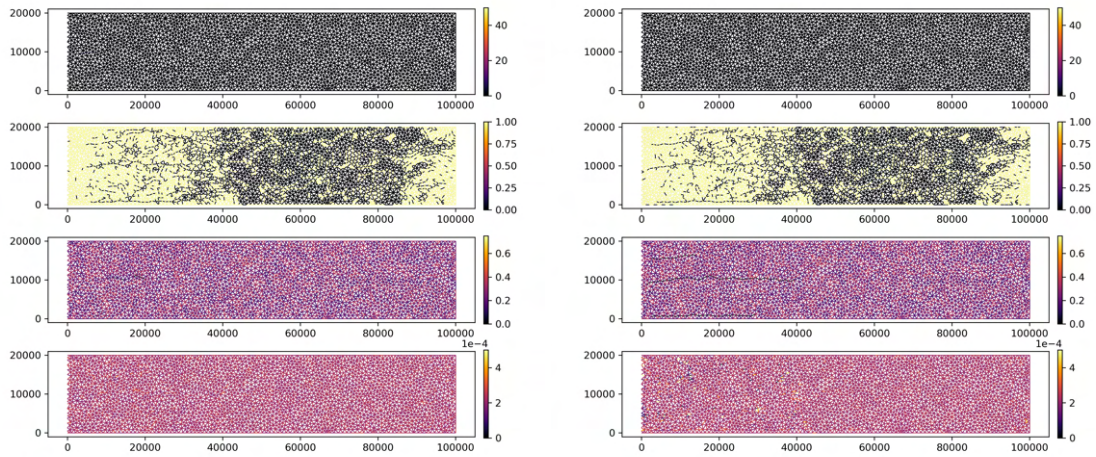

**Figure S160.** Results for the C3D default model run at a) day 0 and b) day 49

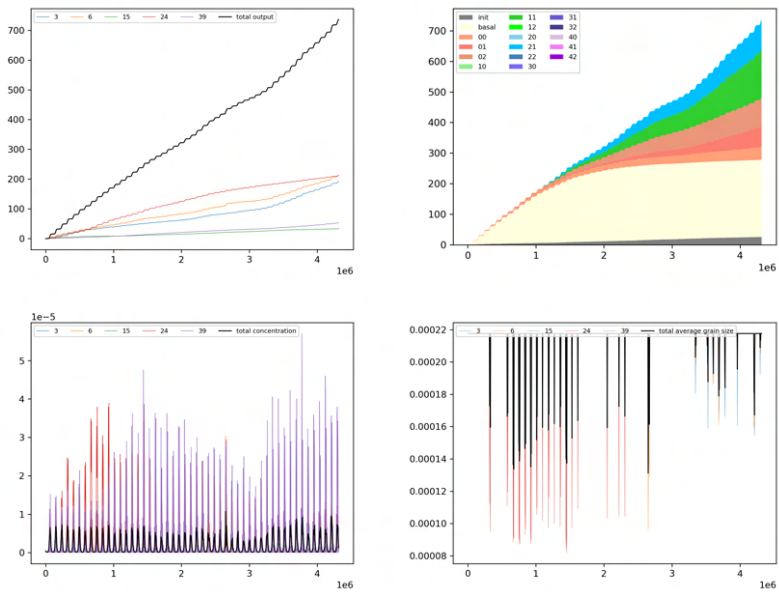

355

**Figure S161.** Outputs from the C3D default model run with a) volume flux b) detritus volume flux c) concentration d) grainsize. In a, c and d numbers indicate outlet node IDs

### 2.4.13 C4 reference

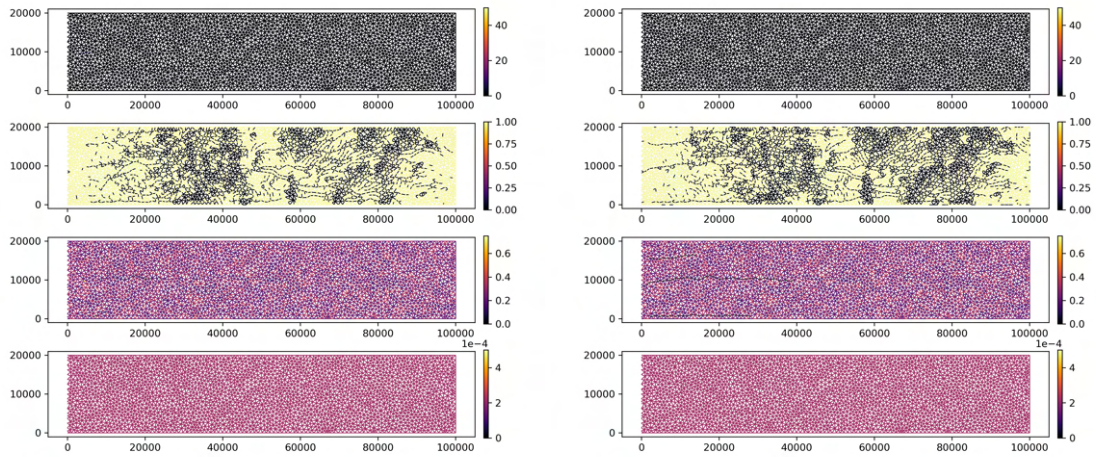

**Figure S162.** Results for the C4 reference model run at a) day 0 and b) day 49

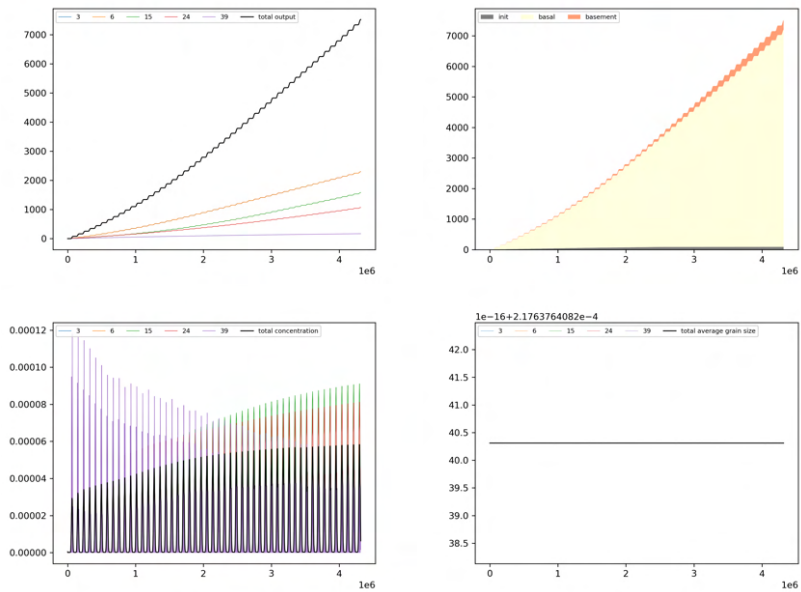

**Figure S163.** Outputs from the C4 reference model run with a) volume flux b) detritus volume flux c) concentration d) grainsize. In a, c and d numbers indicate outlet node IDs

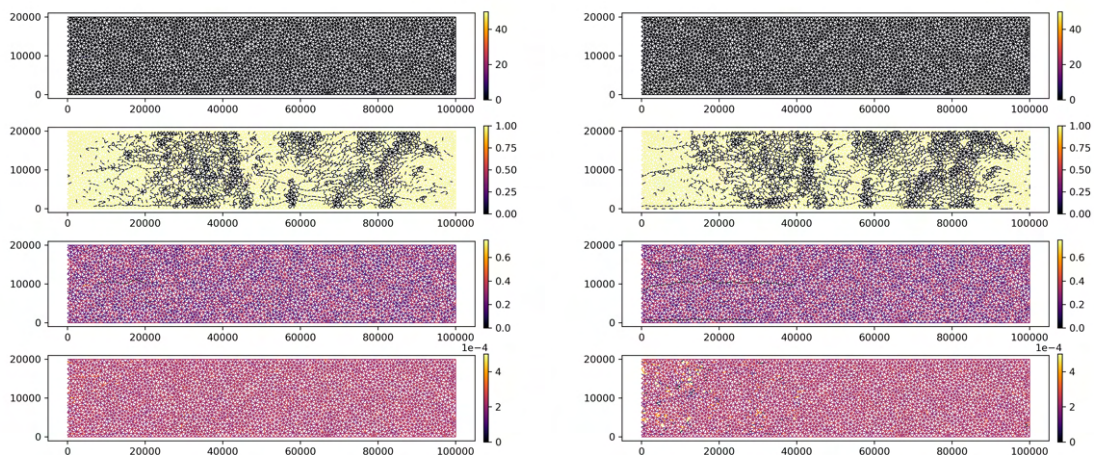

**Figure S164.** Results for the C4 default model run at a) day 0 and b) day 49

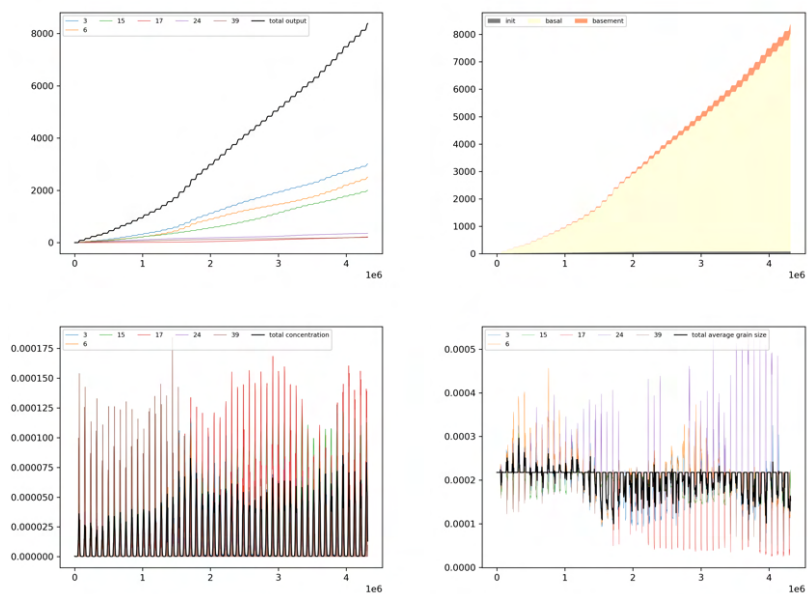

**Figure S165.** Outputs from the C4 default model run with a) volume flux b) detritus volume flux c) concentration d) grainsize. In a, c and d numbers indicate outlet node IDs

## 2.4.15 C4D default

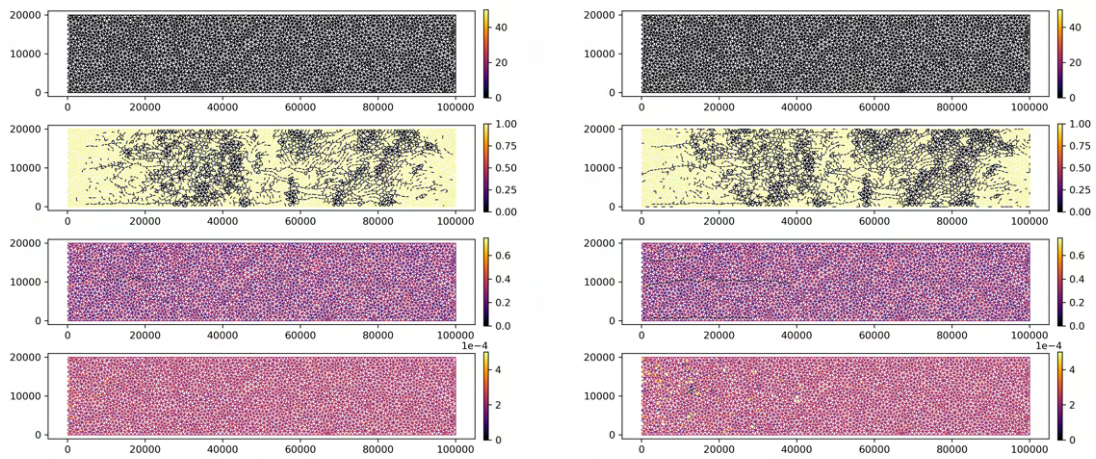

365

**Figure S166.** Results for the C4D default model run at a) day 0 and b) day 49

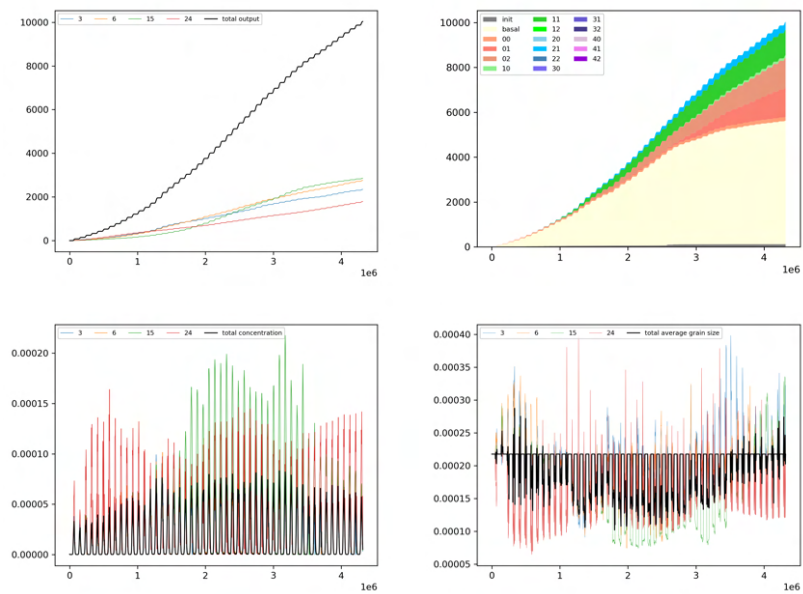

**Figure S167.** Outputs from the C4D default model run with a) volume flux b) detritus volume flux c) concentration d) grainsize. In a, c and d numbers indicate outlet node IDs
